# Supplementary material for: Aqueous extract of Sanghuangporus baumii induces autophagy to inhibit cervical carcinoma growth
Source: Royal Society of Chemistry journal article supplement (doi:10.1039/d2fo02887e), 2023-01-01
Supplement: d2fo02887e2.xlsx [file d2fo02887e2.xlsx]

## Sheet: 总表达量
Gene ID	Gene Symbol	Type	SHWE400 Average Read Count	CC Average Read Count	CC_1 FPKM	CC_2 FPKM	CC_3 FPKM	CC_4 FPKM	SHWE400_1 FPKM	SHWE400_4 FPKM	SHWE400_3 FPKM	SHWE400_2 FPKM	Qvalue (SHWE400/CC)
74277	Chic2	mRNA	513.5	467.75	17.13	10.85	11.05	12.94	16.56	13.64	14.28	12.26	0.765866
67836	Wdr83	mRNA	162.5	160.75	11.59	8.31	7.96	11.02	11.24	8.88	13.18	10.57	0.709245
432552	Fam71b	mRNA	1.16667	1.5	0.03	0.03	0.03	0.1	0.09	0.04	0.03	0.06	0.961183
113848	Vmn1r42	mRNA	0.166667	0.25	0	0	0	0.07	0	0	0	0	0.961183
28109	D10Wsu102e	mRNA	972.333	1382.25	34.92	27.62	27.21	20.54	19.35	22.42	21.76	19.37	0.49677
240427	Setbp1	mRNA	9.16667	22.25	0.1	0.19	0.29	0.03	0.11	0.13	0.02	0.01	0.554364
93685	Entpd7	mRNA	152.858	189.62	1.89	2.13	2.62	2	2.02	1.88	1.61	1.57	0.69395
101488212	Evi2	mRNA	5.36667	5.9925	0	0	0.22	0.2	0.36	0	0	0	0.992335
78929	Polr3h	mRNA	602.667	672.75	29.66	20.8	19.31	22.03	19.63	19.7	23.94	26.71	0.982479
107889	Gcm2	mRNA	0	0.25	0	0	0.02	0	0	0	0	0	0.961183
408067	Zfp874b	mRNA	132.693	131.643	1.47	2.55	2.62	1.93	2.43	2.68	2.47	2.16	0.759727
19042	Ppm1a	mRNA	1225.5	1700.5	56.06	41.78	40.53	32.3	31.2	36.96	26.48	31.67	0.410442
22127	Tsx	mRNA	0.666667	0.25	0.1	0	0	0	0	0.22	0	0	0.961183
432720	Akr1c19	mRNA	0.166667	0	0	0	0	0	0	0.07	0	0	0.961183
619605	Zcchc17	mRNA	444.5	487.75	28.2	24.44	25.29	23.49	22.33	24.33	18.35	26.03	0.958962
100042165	BC005561	mRNA	409.333	254	4.6	3.28	2.44	3.22	3.13	3.63	5.1	4.12	0.650765
22694	Zfp35	mRNA	676.333	712.25	21.96	14.33	14.06	15.65	22.2	13.6	18.1	17.17	0.815575
54648	Ccdc120	mRNA	83.5	97.5	1.79	1.87	1.78	2.03	1.34	1.68	1.17	1.78	0.718533
53380	Psmd10	mRNA	293.5	301.5	16.36	14.95	14.89	15.42	16.03	14.71	13.15	15.8	0.961183
68092	Ncbp2	mRNA	603.667	528.75	12.46	21.65	20.47	20.1	18.86	26.01	17.01	21.26	0.523787
667250	Gm12657	mRNA	291.562	221.06	14.98	16.69	16.84	21.32	22.3	25.76	22.38	26.82	0.0468556
14221	Fjx1	mRNA	2	2.25	0.06	0.09	0.12	0	0.06	0.09	0.06	0	0.967949
83921	Cemip2	mRNA	504.333	823.75	5.4	10.44	11.57	8.09	4.93	7.35	4.39	4.55	0.0874846
56726	Sh3bgrl	mRNA	1034.83	1100.75	15.39	35.46	37.69	21.42	31.97	43.13	19.08	20.73	0.907407
192174	Rwdd4a	mRNA	461	597.75	15.14	15.71	13.99	12.27	9.27	12.48	11.03	10.61	0.415711
233038	Nccrp1	mRNA	0.5	0.75	0	0	0.1	0.05	0	0	0.05	0	0.961183
234967	Slc36a4	mRNA	42	78.25	0.49	1.2	1.66	0.51	1.36	0.64	0.28	0.31	0.77273
13602	Sparcl1	mRNA	170.833	305.5	13.14	6.23	8.84	2.4	3.83	9.69	3.09	2.23	0.526017
245877	Map7d1	mRNA	1326.67	1351	24.22	27.3	27.06	34.54	36.13	31.69	23.42	32.8	0.562934
72461	Prcp	mRNA	487	581.75	8.6	16.75	17.53	12.54	13.16	17.83	8.29	9.09	0.950642
66191	Ier3ip1	mRNA	673.5	627.25	41.19	31.43	28.64	32.02	32.77	33.57	33.94	39.5	0.809355
20926	Supt6	mRNA	1729.33	2709	33.38	30.45	30.02	27.22	23.82	21.55	17.91	21.32	0.0609346
546144	Wdr72	mRNA	0.5	0.5	0.01	0	0.01	0	0.01	0	0	0	0.961183
108167614	Gm46084	mRNA	2.33333	4	0.03	0.05	0.05	0.08	0.01	0.04	0	0.03	0.67842
108167857	LOC108167857	mRNA	1.295	0.27	0	0	0	0.18	0.18	0	0.2	0.73	0.733471
258837	Olfr545	mRNA	0.833333	1.25	0	0	0.08	0.32	0	0	0	0.16	0.950642
93885	Pcdhb14	mRNA	3	2.25	0.06	0.04	0.06	0.02	0.08	0.09	0.06	0.08	0.799225
13035	Ctsg	mRNA	6.5	13.75	0.85	1.18	0.86	1.36	0.6	0.08	0.4	0.45	0.322906
17299	Mettl1	mRNA	658.833	583.5	44.28	38.19	33.3	39.85	31.38	41.75	46.18	49.58	0.641429
381823	Apold1	mRNA	17	26.5	0.98	0.52	0.43	0.33	0.1	0.76	0.26	0.31	0.751933
68067	Mrnip	mRNA	118.667	100.25	6.81	4.59	4.5	10.08	11.74	5.16	11.35	10.15	0.414077
228368	Slc35c1	mRNA	603.5	617.5	10.85	16.6	14.79	17.42	14.5	19.87	13.07	17.53	0.817952
233020	Hipk4	mRNA	5.33333	7.5	0.56	0.09	0.2	0.23	0.25	0.22	0	0.19	0.89933
11475	Acta2	mRNA	260.667	176.25	2	5.46	6.52	5.48	18.33	10.73	2.55	3.37	0.382583
244144	Usp35	mRNA	202.833	214.25	3.17	3.62	3.78	2.78	3.83	4.4	2.34	2.82	0.953486
16803	Lbp	mRNA	52.6667	202	2.49	6.42	13.69	0.33	1.17	5.42	0.49	0.16	0.555197
229214	Qrfpr	mRNA	0.166667	0.5	0.04	0	0.04	0	0	0	0	0	0.950642
15898	Icam5	mRNA	11.1667	13.25	0.12	0.46	0.36	0.32	0.16	0.41	0.15	0.3	0.961183
108900	Fam72a	mRNA	156.833	166	9.62	9.2	8.32	9.28	8.7	8.4	6.99	10.16	0.994233
66156	Anapc11	mRNA	2016.61	1385.37	25.32	22.71	22.05	44.7	40.91	43.9	40.36	46.91	0.104683
27973	Vkorc1	mRNA	841.667	669.25	79.93	61.75	69.1	78.77	81.75	98.51	107.29	86.29	0.191723
18992	Pou3f2	mRNA	0.166667	0	0	0	0	0	0	0.01	0	0	0.961183
55990	Fmo2	mRNA	28.8333	64	1.63	1.24	1.24	0.15	1.16	0.84	0.44	0.06	0.75048
97541	Qars	mRNA	2182.17	2056.25	54.84	55.69	56.75	65.98	68.75	64.73	74.16	62.47	0.288236
12813	Col10a1	mRNA	1.83333	1.75	0.07	0	0.05	0.04	0.09	0.02	0.07	0.04	0.938459
67931	Serpini2	mRNA	0	0.75	0	0	0.16	0	0	0	0	0	0.908836
74691	Tdrd9	mRNA	0.666667	0.25	0	0.02	0	0	0.02	0.02	0	0.02	0.936837
16005	Igfals	mRNA	0	0.5	0	0	0	0.07	0	0	0	0	0.950642
67186	Rplp2	mRNA	13994.3	9981.94	2668.66	1523.24	1673.98	2570.56	2647.7	2479.03	3964.01	2993.62	0.212365
23795	Agr2	mRNA	0.333333	0	0	0	0	0	0	0.23	0	0	0.940082
15377	Foxa3	mRNA	17.8333	16.75	0.18	0.61	0.75	0.83	0.55	0.72	0.76	0.75	0.856784
213019	Pdlim2	mRNA	88.3333	81	2.69	3.38	5.1	3.84	6.23	5.69	3.04	2.82	0.700543
327826	Frs2	mRNA	286	546.5	6.19	7.19	7.43	5.75	3.7	4.13	2.53	3.52	1.89544e-05
18619	Penk	mRNA	16.1667	10.25	0.52	0.32	0.64	0.65	1.5	1.43	0.58	0.59	0.356637
224630	Bnip1	mRNA	271.5	221.75	14.37	12.4	12.83	20.69	20.77	19.5	20.13	24.24	0.174014
13660	Ehd1	mRNA	3041	3276.5	80.44	73	71.42	64.4	70.23	74.34	72.1	60.17	0.961183
112422	Zfp979	mRNA	104.405	129.425	2.31	4.65	4.68	3.66	4.95	3.66	1.91	3.12	0.961183
103142	Rdh9	mRNA	3	3.25	0.1	0.11	0.05	0.08	0.15	0.14	0	0.13	0.961183
105000	Dnal1	mRNA	92.5	113.5	0.92	1.49	1.58	1.37	1.67	1.19	1.04	1.1	0.994239
56644	Clec7a	mRNA	1034.5	486.75	4.22	6.01	8.14	45.85	73.99	44.3	21.99	44.83	0.271175
101055854	Gm29733	mRNA	1	0.25	0.08	0	0	0	0.15	0.08	0	0.15	0.799805
93886	Pcdhb15	mRNA	0.666667	1	0	0.03	0.05	0.02	0.02	0	0.05	0	0.990161
73149	Clec4a3	mRNA	347.667	478.25	1.37	52.49	43.12	14.28	29.54	42.66	16.64	8.65	0.983382
18129	Notch2	mRNA	817.5	1161.75	5.78	8.4	9.09	6.97	7.21	5.88	4.06	5.33	0.300259
666145	Armh2	mRNA	1.33333	0.5	0	0.06	0	0.06	0.17	0.12	0.06	0.06	0.705347
320709	Tmem117	mRNA	96.6667	65.25	0.61	1.39	1.21	3.38	3.31	3.07	1.65	3.42	0.322906
213211	Rnf26	mRNA	814.833	973	30.08	30.27	30.4	31.54	23.12	29.99	20.5	31.37	0.799805
333588	Gm15104	mRNA	0.5	0	0	0	0	0	0	0.03	0	0	0.961183
625018	C4a	mRNA	9.965	13.1025	0.12	0.14	0.25	0.17	0.2	0.25	0.05	0.17	0.969372
14422	B4galnt2	mRNA	8.33333	12.5	0.14	0.47	0.22	0.05	0.16	0.17	0.07	0.17	0.874448
20311	Cxcl5	mRNA	40.1667	109.5	8.16	4.39	6.15	0.69	2.3	3.18	1.45	0.6	0.275203
280411	Lix1l	mRNA	353.667	468.5	12.19	15.29	14.64	11	9.85	14.49	8.06	8.66	0.49677
18813	Pa2g4	mRNA	6246	6664.75	212.41	198.11	184.77	184.14	171.94	186.85	176.81	240.96	0.908328
60533	Cd274	mRNA	774.167	593.5	5.06	10.82	12.08	17.5	40.31	13.25	12.63	10.96	0.279727
83945	Dnaja3	mRNA	1041.17	1087.25	22.32	31.09	29.08	38.08	28.48	30.9	27.23	33.07	0.896342
68939	Rasl11b	mRNA	41.3333	41.5	2.13	1.04	1.58	2.05	1.98	1.68	2.24	1.47	0.90386
240660	Slc35g1	mRNA	10.3333	26	0.16	0.68	1.1	0.18	0.37	0.15	0.17	0.14	0.414101
20391	Sgca	mRNA	8.5	38	2.8	0.17	2.44	1.33	0	0	0	0.21	0.00306517
56451	Suclg1	mRNA	1012.67	1040.75	55.36	53.82	54.3	58.05	64.1	55.19	45.03	73.19	0.631453
236727	Slc9a7	mRNA	10.8333	14.5	0.1	0.22	0.28	0.03	0.13	0.18	0.03	0.06	0.871094
13382	Dld	mRNA	2672.33	3504.75	119.84	117.62	107.52	94.75	82.21	85.69	89.24	90.02	0.505093
66419	Mrpl11	mRNA	789.167	835.5	24.67	19.45	17.59	18.97	17.59	18	20.68	20.56	0.978697
13494	Drg1	mRNA	1793.67	1787.75	87.92	87.99	81.33	86.71	80.78	86.07	89.4	89.71	0.819995
208666	Diras1	mRNA	12.5	26.75	0.58	0.83	0.95	0.24	0.14	0.39	0.07	0.28	0.20463
56389	Stx5a	mRNA	652.167	620.75	23.19	22.84	22.76	23.54	26.78	26.07	28.29	26.34	0.329735
93882	Pcdhb11	mRNA	1.83333	1.5	0	0.02	0.06	0.04	0.07	0.06	0.02	0.04	0.882282
76501	Commd9	mRNA	176.667	185.5	12.8	10.77	12.02	12.05	13.35	12.53	11.2	11.64	0.840429
545884	Gm5885	mRNA	0.166667	0.25	0	0	0	0.13	0	0	0	0.12	0.992335
108156	Mthfd1	mRNA	1208.33	1584.75	32.33	36.48	36.31	28.71	25.28	25.51	25.57	28.79	0.415223
13728	Mark2	mRNA	734.667	961.25	13.41	17.26	16.48	16.43	13.5	14.65	11.18	13.04	0.338883
68917	Hint2	mRNA	25.3333	22	0.87	2.8	5.27	3.8	5.87	7.48	1.92	1.82	0.812081
70099	Smc4	mRNA	4403.5	5237.75	88.96	94.64	83.07	90.33	83.78	72.1	86.34	83.12	0.968441
319352	Pianp	mRNA	9.5	16	0.1	0.18	0.21	1.66	0.68	0.19	0.69	0.1	0.966947
238896	Cdc20b	mRNA	3	2	0.11	0.01	0.02	0.03	0.07	0.07	0.05	0.04	0.835837
68585	Rtn4	mRNA	4395.39	4696.51	88.79	75.71	74.81	68.63	69.4	101.25	75.53	70.66	0.997834
100129	Gpr153	mRNA	59	106.25	0.67	2.23	4.48	0.42	1.54	2.4	0.48	0.39	0.769045
240817	Teddm2	mRNA	0.166667	0.25	0	0	0	0.04	0	0	0.05	0	0.992335
57265	Fzd2	mRNA	112.667	122.75	1.55	2.25	2.98	2.68	2.1	3.14	1.17	2.35	0.987229
93735	Wnt16	mRNA	1	0.5	0	0.04	0.04	0	0	0.28	0	0	0.903959
11843	Arf4	mRNA	2835.67	2531	90.05	90.83	88.55	86.82	102.52	116.82	107.6	84.04	0.275575
18196	Nsg1	mRNA	9.00833	39.5525	0.65	1.98	2.54	0.17	0.41	0.46	0.22	0.14	0.111862
226777	C130074G19Rik	mRNA	31.8333	32.75	0.22	1.13	1.4	0.51	0.79	2.21	0.15	0.5	0.961183
66410	Mterf3	mRNA	654.552	608.855	27.91	33.26	26.29	28.06	29.34	31.87	34.26	30.55	0.562934
17868	Mybpc3	mRNA	3	7.5	0.13	0.19	0.08	0.1	0.05	0.09	0.03	0.08	0.659628
13982	Esr1	mRNA	42.6667	38.75	0.16	0.64	0.72	0.49	1.3	0.58	0.46	0.26	0.819791
330122	Cxcl3	mRNA	95.6667	90.5	8.51	4.22	6.87	7.67	9.34	6.67	6.89	7.76	0.793414
74103	Nebl	mRNA	3.16667	2	0.02	0.01	0.05	0	0.11	0.03	0.02	0.05	0.930108
239552	Apol8	mRNA	19.3333	12.75	0.08	0.18	0.08	1.13	0.99	0.6	0.59	0.76	0.498351
11546	Parp2	mRNA	679.667	748	31.57	29.33	28.97	31.09	32.64	26.64	29.53	32.82	0.855457
100040048	Ccl27b	mRNA	0.261667	0.3075	0.07	0	0.14	0.05	0	0	0.07	0
19946	Rpl30	mRNA	28951.5	21714.1	4333.5	3274.14	3051.3	3936.26	4860.09	3935.84	6546.4	5123.53	0.162623
17314	Mgmt	mRNA	11.3333	9.5	0.21	0.64	1.49	1.33	2.16	2.33	0.5	0.47	0.805725
213573	Cracr2b	mRNA	24.1667	19.25	0.26	0.76	1.61	0.56	2.05	1.62	0.38	0.43	0.803683
268747	Carmil3	mRNA	1	1.5	0.03	0.03	0.02	0.04	0.03	0.08	0	0	0.982718
20773	Sptlc2	mRNA	1249.33	1282.5	11.65	12.87	12.77	15.21	14.6	14.11	12.39	13.88	0.56563
228061	Agps	mRNA	1268.83	1853.25	16.81	20.12	18.81	13.51	12.21	13.21	10.13	11.76	0.0504418
16764	Aff3	mRNA	3.5	3	0.01	0.02	0.07	0.02	0.02	0.12	0	0.01	0.961183
11798	Xiap	mRNA	829.833	1286.25	8.02	18.91	17.18	10.48	8.76	11.37	6.16	7.51	0.175195
110147	Ehmt2	mRNA	2356.67	1951.25	28.59	30.29	34.25	49.67	58.62	45.34	44.63	52.48	0.0781288
329919	Skint2	mRNA	0.166667	0	0	0	0	0	0.06	0	0	0	0.961183
20931	Surf2	mRNA	941.333	819	52.35	55.93	48.24	57.95	54.72	61.98	65.76	77.49	0.253409
27059	Sh3d19	mRNA	491.167	483.5	2.17	5.94	5.77	10.68	10.06	7.91	4.87	6.4	0.686964
26443	Psma6	mRNA	2663.83	2815	264.43	217.65	211.21	178.7	184.87	208.68	219.26	228.82	0.961183
404242	Mrgprx1	mRNA	0	0.25	0	0.06	0	0	0	0	0	0	0.961183
80744	Cwc22	mRNA	667	1195	23.74	31.46	32.91	15.68	13.97	12.6	13.76	13.71	0.0224207
66469	Fam213b	mRNA	64.1667	57.5	0.51	6.23	10.03	6.78	7.99	15.19	3.76	3.96	0.834963
18256	Oc90	mRNA	0	0.25	0.05	0	0	0	0	0	0	0	0.961183
209462	Hace1	mRNA	217.167	293.5	5.91	6.11	5.48	4.56	4.07	4.93	4.57	4.25	0.473011
74528	Mgme1	mRNA	592	786.5	21.66	20.96	20.58	15.61	14.25	15.08	14.12	17.19	0.422495
70354	Secisbp2l	mRNA	662.333	960.5	7.19	11.5	11.07	9.24	7.44	8.71	5.33	5.42	0.128468
170757	Adgrl4	mRNA	44.6667	58.75	0.59	1.15	1.9	0.37	0.62	1.74	0.44	0.46	0.950642
14425	Galnt3	mRNA	28.1667	19.25	0.04	0.25	0.34	0.83	0.99	0.65	0.61	0.28	0.625957
102632	Acad11	mRNA	93.1667	99.25	1.77	2	1.95	2.58	3.58	2.12	1.34	1.93	0.883558
243653	Clec1a	mRNA	13.1667	20	0.41	0.66	0.43	0.32	0.19	0.51	0.27	0.16	0.725246
216393	D930020B18Rik	mRNA	0	0.25	0	0	0.02	0	0	0	0	0	0.961183
383787	Ankrd63	mRNA	27.6667	23.25	0.18	0.33	0.4	0.4	0.33	0.55	0.21	0.4	0.899845
330863	Trim67	mRNA	0	0.25	0.01	0	0	0	0	0	0	0	0.961183
60455	Rxylt1	mRNA	167.667	267.25	4.57	5.89	6.47	3.9	2.89	4.28	1.9	3.46	0.119638
20418	Shc3	mRNA	0	0.75	0.05	0	0.1	0	0	0	0	0	0.903234
56150	Mad2l1	mRNA	2235.33	2070.75	96.8	94.9	92.15	85.84	95.21	104.2	94.56	110.4	0.364678
218121	Mboat1	mRNA	749	808.75	13.8	22.85	23.08	19.56	17.44	21.77	15.19	18.97	0.992824
67770	Caap1	mRNA	111.333	115.25	3.2	4.61	4.11	3.69	3.75	4.46	2.83	3.08	0.961183
66413	Psmd6	mRNA	1355.83	1614.25	116.44	89.44	87.11	79.07	78.37	80.44	77.91	92.3	0.94734
76123	Gpsm2	mRNA	1060.34	1236.16	25.85	27.54	29.83	26.96	25.43	23.53	25.27	28.8	0.961183
66126	Elof1	mRNA	711.833	651	56.24	53.88	51.67	51.43	63.67	65.66	54.94	65	0.162461
71685	Galnt14	mRNA	0.333333	0.5	0.05	0	0	0	0.03	0	0	0	0.961183
237222	Ofd1	mRNA	337.667	500.5	10.81	6.81	7.04	7.24	7.14	5.25	5.88	6.27	0.62228
75731	Idnk	mRNA	470.833	286	7	11.56	11.14	27.3	32.5	23.59	24.41	26.52	0.089618
18018	Nfatc1	mRNA	156.833	186.25	1.12	3.02	4.46	2.85	3.88	3.39	1.83	2.01	0.972038
71063	Zfp597	mRNA	177	299.5	3.9	4.08	4.38	2.47	1.77	2.18	1.73	1.96	0.0116879
15213	Hey1	mRNA	15.6667	8	0.11	0.2	0.43	0.37	0.44	1.05	0.3	0.29	0.519768
381410	Zfp408	mRNA	236.167	334	7.57	5.61	5.92	4.89	4.92	5	4.04	4.52	0.549943
14790	Grcc10	mRNA	1038.5	667.5	77.15	84.24	86.43	156.92	161.17	154.32	177.25	148.57	0.0633421
226791	Lyplal1	mRNA	15	15	0.2	0.68	1.35	0.7	1.39	1.44	0.24	0.3	0.950642
70178	Abhd17c	mRNA	769.667	746.75	20.29	24.84	23.29	26.87	22.25	28.39	20.92	25.67	0.757259
381917	Dnah3	mRNA	1.83333	1.75	0.01	0.02	0	0.01	0.01	0.04	0.01	0	0.961183
76646	Wdr38	mRNA	0.5	0.75	0.07	0	0.13	0	0.13	0	0	0	0.965036
23836	Cdh20	mRNA	0.333333	0.75	0	0	0.02	0.04	0	0	0	0	0.906397
19070	Mob4	mRNA	899.918	817.9	20.6	21.11	20.2	19.84	22	22.6	23.67	21.82	0.410385
15254	Hint1	mRNA	3476.33	2625.5	421.07	355.3	324	467.71	491.11	471.04	530.35	568.83	0.140151
15893	Ica1	mRNA	5.83333	6.25	0.28	0.32	0.28	0.08	0.46	0.42	0.05	0.15	0.980952
100862388	Gm21698	mRNA	34.2433	24.67	0.48	1.47	0.43	0	0	0.96	0.34	0	0.920094
665113	Tnik	mRNA	16	29	0.09	0.31	0.48	0.16	0.21	0.14	0.07	0.08	0.489604
102637189	Gm34066	mRNA	0.333333	0.5	0	0.06	0	0.06	0	0	0	0	0.950642
66704	Rbm4b	mRNA	278.903	350.74	2.93	5.47	5.58	3.8	3.8	4.77	3.45	4.1	0.746807
72119	Tpx2	mRNA	2176.33	2815	63.81	62.42	59.59	61.67	54.79	44.34	45.91	57.15	0.426318
667803	H2-T-ps	mRNA	65.2267	38.655	1.02	2.1	2.23	4.7	6.16	5.77	5.21	4.08	0.11015
58802	Kcnmb4	mRNA	0.666667	0	0	0	0	0	0	0.25	0	0	0.883558
70021	Nt5dc2	mRNA	1437.5	1583.25	52.33	69.65	66.79	65.54	62.79	71.32	42.59	75.97	0.982718
432555	Gm5431	mRNA	69.1167	49.41	0.06	0.81	1.21	2.58	2.81	3.23	1	1.93	0.52205
75469	Spata19	mRNA	0	0.25	0.12	0	0	0	0	0	0	0	0.961183
545291	Hpse2	mRNA	0.5	0.25	0	0	0.02	0	0.02	0	0	0.02	0.961183
108169171	Gm46977	mRNA	0.666667	1.75	0.12	0.13	0	0.02	0	0.04	0	0.02	0.892103
12237	Bub3	mRNA	1738.83	1881.5	76.19	62.41	62.5	59.37	64.3	58.89	63.7	63.76	0.961183
11536	Gpr182	mRNA	4.33333	7	0.13	0.31	0.7	0.08	0.17	0.51	0	0.12	0.935047
19324	Rab1a	mRNA	2076.9	2110.16	45.95	61.86	65.85	51.51	60.44	65.31	53.54	53.72	0.58206
52815	Ldhd	mRNA	120	88	1.73	1.93	1.89	5.7	6.72	3.89	3.64	4.15	0.327972
99334	Zscan29	mRNA	249	295.5	4.98	5.19	5.65	4.51	4.22	4.32	4.19	5.03	0.723506
381059	Gm1604b	mRNA	0.166667	0.25	0	0	0	0.1	0	0	0	0	0.961183
71884	Chit1	mRNA	1.33333	0.25	0	0	0.04	0	0.08	0.05	0.05	0.12	0.583237
21331	T2	mRNA	0.5	0.5	0	0	0.16	0	0	0.09	0	0.16	0.961183
72136	Chst14	mRNA	231.5	266.5	7.18	9.42	9.2	10.79	7.77	11.33	5.97	7.19	0.939478
78937	Avl9	mRNA	370	498	5.52	5.59	5.71	4.88	5.07	4.95	4.13	3.41	0.438097
545384	Ifi214	mRNA	3.12667	4.47	0	0.38	0.25	0.41	0.57	0.33	0.06	0.06	0.992335
20303	Ccl4	mRNA	134.5	103.5	17.27	10.64	9.43	14.37	42.11	13.98	10.29	15.75	0.401875
75482	Hspb9	mRNA	4.16667	5.5	0.56	0.68	0.68	0.55	0.43	0.6	0.34	0.54	0.961183
241070	Gpr1	mRNA	0.833333	1.5	0	0.08	0.08	0.08	0	0.13	0.04	0	0.961183
71718	Telo2	mRNA	563.5	588.25	15.82	11.49	11.73	13.78	16.23	15.57	12.63	17.46	0.81226
75079	Zbtb49	mRNA	86.6667	108.25	3.46	3.21	2.86	2.68	2.43	3.13	2.37	2.53	0.797223
66161	Pop4	mRNA	226.833	297	26.78	15.42	15.94	15.2	14.69	14.21	13.6	18.19	0.862156
56334	Tmed2	mRNA	8116.66	8197.03	331.78	291.41	294.3	278.01	254.5	321.16	286.96	272.42	0.965936
76788	Klhdc10	mRNA	1356.67	1753.75	19.97	21.47	20.71	20.22	18.34	16.5	14.78	17.74	0.381352
72397	Rbm12b1	mRNA	301.593	258.712	2.25	6.2	6.27	4.98	5.11	6.39	5.05	5.58	0.755282
381085	Tbc1d22b	mRNA	312.5	471.5	11.06	9.47	8.9	8.05	6.97	7.44	4.85	7.06	0.199891
52530	Nhp2	mRNA	5164.33	4261	364.59	309.92	278.55	353.48	328.92	348.02	417.59	500.16	0.352665
69802	Cox11	mRNA	217.537	176.593	4.54	5.48	5.34	6.94	7.27	6.86	6.42	7.55	0.194085
66839	Dele1	mRNA	1803.5	1926.75	56.8	56.95	54.14	60.1	51.87	56.67	54.81	68.63	0.800074
68644	Abhd14a	mRNA	434	331.5	20.59	22.72	20.28	30.32	27.81	34.56	29.6	35.21	0.114185
66977	Nuf2	mRNA	762.333	908	24.22	34.03	27.25	35.52	31.49	24.35	25.66	28.68	0.961183
100040563	Dynlt1c	mRNA	786.985	871.727	126.94	97.39	96.7	93.29	119.72	99.29	85.71	82.12	0.992335
68212	Tmbim4	mRNA	631.167	490.5	47.92	43.47	44.65	57.43	67.33	62.11	64.02	60.16	0.0874846
15525	Hspa4	mRNA	5365.5	6313	95.56	99.15	94.31	88.34	90.65	79.44	77.33	94.77	0.961183
17755	Map1b	mRNA	2466.5	3334	10.94	25.24	23.31	17.44	11.36	15.35	9.84	12.86	0.174948
20787	Srebf1	mRNA	1197.83	1544.5	26.23	27.56	25.05	21.16	14.65	28.55	19.6	17.66	0.676981
72083	Mzt2	mRNA	154.667	206.25	28.36	14.28	15.37	10.91	11.19	14.23	8.83	14.64	0.591284
66447	Mgst3	mRNA	1039.17	890.5	130.05	96.69	114.13	129.74	129.44	140.36	128.22	135.99	0.428055
98752	Fcrla	mRNA	4.5	1.25	0.04	0.04	0.09	0.04	0.17	0.28	0.14	0.17	0.411045
64705	Dpys	mRNA	1.5	0.5	0	0	0.03	0.03	0.06	0.2	0	0	0.782539
381924	Itgad	mRNA	56.4083	137.923	0.14	6.97	2.7	0.23	0.2	3.02	2.8	0.07	0.953598
116837	Rims1	mRNA	0.166667	0	0	0	0	0	0	0.02	0	0	0.961183
211922	Dennd6a	mRNA	644.833	871.58	9.49	19.45	19.06	13.05	10.29	13.5	8.83	9.84	0.288245
235320	Zbtb16	mRNA	10.6667	40.25	0.28	0.34	0.77	0.14	0.11	0.08	0.01	0.05	0.0242788
20770	Mucl2	mRNA	0	555	0	0	0	283.8	0	0	0	0	8.93084e-11
108168393	LOC108168393	lncRNA	0	0.25	0.01	0	0	0	0	0	0	0	0.961183
13871	Ercc2	mRNA	637.458	636.12	14.52	10.59	9.89	15.02	14.89	12.8	11.02	16.8	0.707739
17777	Mttp	mRNA	59.8333	126.25	2.82	2.65	2.45	1	0.85	1.08	0.63	1.21	0.0581062
66358	Adprm	mRNA	238.833	225.5	12.12	12.24	11.45	12	12.48	14.16	13.13	10.41	0.715997
73720	Cst6	mRNA	5	13.25	0.25	0.07	0.16	0.45	0.02	0.11	0.05	0.1	0.339466
245880	Wasf3	mRNA	1	3	0	0	0.14	0.03	0.01	0.06	0	0	0.866581
18211	Ntrk1	mRNA	0.166667	0	0	0	0	0	0	0	0	0
11607	Agtr1a	mRNA	22.6667	30.75	0.38	1.29	2.26	0.28	2.03	0.94	0.28	0.3	0.977581
104771	Jkamp	mRNA	351.333	320.25	10.27	13.94	11.87	12.41	11.8	15.19	12.54	15.33	0.619874
102638268	1700014D04Rik	mRNA	0.666667	0.75	0.02	0.02	0.02	0	0	0.02	0	0.02	0.961183
18054	Ngp	mRNA	56.3333	195.5	25.05	10.65	8.29	6.94	3.21	2.53	8.15	1.2	0.119177
224705	Vps52	mRNA	563.333	656	14.93	17.82	17.21	17.87	18.48	18.96	11.79	14.84	0.971672
235184	Msantd2	mRNA	810.667	769.72	8.4	18.97	17.61	21.76	24.54	19.74	17.37	24.51	0.658727
68099	Fam92a	mRNA	30.8333	33.75	0.6	1.27	2.05	1.33	2.2	2.48	0.74	0.41	0.961183
240913	Adamts4	mRNA	44.1667	68.75	1.04	1.37	1.46	1.36	0.81	1.29	0.82	0.39	0.468786
78903	Wrnip1	mRNA	807.333	952	27.48	24.01	25.08	25.43	20.16	21.93	18.59	22.98	0.568976
76282	Gpt	mRNA	55.1667	47	0.61	1.77	1.97	3.25	2.63	2.23	1.58	2.32	0.853913
12745	Clgn	mRNA	0.166667	0	0	0	0	0	0.02	0	0	0	0.961183
68552	Smim14	mRNA	520.5	464.5	15.89	13.19	12.22	15.84	20.48	20.81	16.06	14.36	0.288121
103968	Plin1	mRNA	1	7.5	0	0	1.07	0.08	0.11	0.04	0.04	0	0.569998
72129	Pex13	mRNA	514.167	519.5	10.82	7.27	8.36	8.58	10.2	9.21	10.41	8.67	0.684494
69623	Zfp33b	mRNA	63.5567	73.0675	1.01	1.97	1.46	1.31	1.63	1.19	1.08	1.5	0.989066
666207	Gm7980	mRNA	0.166667	0	0	0	0	0	0.05	0	0	0.05
67602	Necap1	mRNA	894.5	974.25	28.43	27.34	28.55	31.47	30.13	28.92	30.63	23.54	0.942557
268780	Egflam	mRNA	2.33333	2	0.06	0	0.04	0.04	0.1	0	0.02	0.02	0.994639
17219	Mcm6	mRNA	4077	5997	148.55	149.7	149.36	116.31	90.53	96.11	122.16	100.09	0.388676
230579	Fam151a	mRNA	0.355	0.26	0.04	0	0	0	0	0	0	0	0.961183
243912	Hspb6	mRNA	150.333	290.75	18.37	7.93	15.38	23.26	9.46	6.51	7.04	12.33	0.223693
78757	Rictor	mRNA	891.833	1624.25	13.97	14.41	12.16	7.24	6.27	7.89	6.49	5.46	0.0427462
380850	Gm5141	mRNA	96.335	82.5625	0.89	2.37	1.5	2.3	2.19	1.82	1.52	2.74	0.72528
67945	Rpl41	mRNA	16779.3	11577	2392.58	2103.68	2055.66	3066.43	2896.95	3128.25	4089.38	3502.51	0.104671
15437	Hoxd8	mRNA	258	289.25	14.66	9.72	11.65	9.68	8.83	11.23	9.46	13.33	0.967949
20598	Smpd2	mRNA	67.1667	71	2.39	2.98	3.15	4.6	4.33	2.79	3.14	3.46	0.957967
99899	Ifi44	mRNA	323.833	254.75	0.22	1.33	1.87	20.99	12.63	12.34	15.05	5.63	0.774229
100043918	LOC100043918	mRNA	0.763333	0.25	0	0	0	0.19	0	0	0.53	0	0.961183
12571	Cdk6	mRNA	1187.17	1710.25	7.95	12.31	11.8	8.5	6.76	9.46	6.69	6.15	0.253409
225266	Klhl14	mRNA	0	0.25	0.02	0	0	0	0	0	0	0	0.961183
12514	Cd68	mRNA	1268.67	1154.25	40.61	64.57	90.31	82.04	174.1	95.55	64.39	58.01	0.353792
319734	Cacna2d4	mRNA	0.166667	0	0	0	0	0	0	0.01	0	0	0.961183
20278	Scnn1g	mRNA	0.166667	0.25	0	0.03	0	0	0	0	0	0.03	0.992335
74188	Prl8a8	mRNA	0.166667	0	0	0	0	0	0	0	0	0
13081	Cyp24a1	mRNA	0.5	0.25	0	0	0.02	0	0	0	0	0.02	0.992335
628308	Zfp970	mRNA	930.007	811.065	6.29	16.27	12.57	13.15	8.92	18.14	9.58	15.07	0.840429
71745	Cul2	mRNA	738.833	903.75	21.53	19.83	20.72	19.83	20.71	15.86	17.26	18.77	0.889392
236149	Slc22a26	mRNA	0	0.25	0	0	0.02	0	0	0	0	0	0.961183
107373	Fam111a	mRNA	1465.83	1547.75	17.07	42.6	37.09	38.89	43.4	39.33	25.18	33.86	0.850233
20471	Six1	mRNA	6.5	20.75	0.27	0.28	0.95	0.56	0.02	0.27	0.08	0.1	0.128711
99982	Kdm1a	mRNA	1109.67	1488.25	40.07	34.61	35.81	32.14	30.28	30.24	27.28	26.02	0.468507
14050	Eya3	mRNA	648	721.25	6.68	11.95	11.67	10.48	9.96	10.47	6.82	8.93	0.992976
234396	Ankle1	mRNA	107.167	93	0.39	2.73	2.86	3.8	2.75	3.56	1.61	3.94	0.815977
22412	Wnt9b	mRNA	0	0.75	0	0	0.02	0.03	0	0	0	0	0.906397
101055731	Gm29719	pseudo	0.183333	0.65	0	0	0.14	0	0	0	0	0	0.950642
70625	Med26	mRNA	371.167	423.5	11.89	9.64	8.2	10.07	10.17	8.86	10.11	9.62	0.961183
100036521	Umad1	mRNA	106.5	113.5	3	4.62	4.3	3.03	3.72	4.71	2.84	3.09	0.964059
193838	Eme2	mRNA	63	67.75	1.35	3.68	3.42	4.63	2.76	2.66	3.23	3.89	0.961183
53420	Syt5	mRNA	3.33333	1.5	0.04	0.08	0.08	0.04	0.04	0.4	0.12	0.04	0.692436
17877	Myf5	mRNA	0.666667	3.25	0.17	0	0.1	0.17	0	0	0	0.03	0.431398
100504234	Ccdc170	mRNA	1	0.25	0	0	0.03	0	0.05	0.05	0.03	0	0.790484
74150	Slc35f5	mRNA	251.5	334	8.08	9.39	11.01	7.62	6.97	8.93	5.59	4.82	0.398926
101113	Snx21	mRNA	368.562	316.87	9.27	12.21	10.73	17.9	16.07	16.97	15.82	15.01	0.337028
106572	Rab31	mRNA	1391	1834.75	26.9	45.92	45.16	30.14	26.33	39.7	23.28	27.33	0.613359
104099	Itga9	mRNA	127.667	188.75	0.88	3.09	2.86	1.41	2.34	2.92	1.29	0.65	0.920309
233328	Lrrk1	mRNA	585.5	703.75	6.29	8.48	7.83	7.04	9.37	8.64	6.13	6.66	0.998828
213956	Fam83f	mRNA	26.8333	17.75	0.23	0.38	0.31	0.74	1.68	0.61	0.46	0.57	0.331068
269037	Ctif	mRNA	105.167	140.5	1.2	1.6	1.57	1.91	1.53	1.37	0.94	1.3	0.771042
68036	Zfp706	mRNA	5610.09	5211.22	77.86	80.32	74.98	94.04	84.12	89.59	96.1	100.06	0.377475
13605	Ect2	mRNA	1989.83	2854	41.55	57.56	53.74	45.44	33.49	35.4	35.22	33.11	0.0609689
140493	Kcnn3	mRNA	2.16667	8.5	0.06	0.02	0.12	0.11	0.02	0.01	0	0.01	0.13895
73284	Ddit4l	mRNA	7.5	12	0.08	0.16	0.87	0.15	0.05	0.08	0	0.08	0.216534
54219	Cd320	mRNA	822.5	785.75	32.46	24.13	24.04	21.1	19.37	27.81	26.03	29.23	0.940082
12362	Casp1	mRNA	314.667	183.25	1.16	8.64	11.69	14.07	27.8	14.61	12.73	25.05	0.15028
56089	Ramp3	mRNA	1099.83	973.25	78.26	56.41	58.13	45.43	32.71	85.58	52.71	70.14	0.959016
94062	Mrpl3	mRNA	486.833	644.5	34.01	32.12	32.35	25.34	24.9	24.92	24.64	27.75	0.714355
69664	Krtap1-5	mRNA	1.5	0.5	0.15	0	0	0	0.07	0	0.38	0	0.882295
67815	Sec14l2	mRNA	95.6667	137.5	4.49	4.39	3.32	3.24	3.34	2.81	1.59	3.32	0.501792
230766	Fam167b	mRNA	18	13.25	0.25	1.26	1.75	1.13	1.43	3.37	0.76	0.88	0.757088
56294	Ptpn9	mRNA	844.667	1191.5	18.74	21.85	22.71	18.54	12.89	18.65	12.3	14.75	0.108797
619441	Tnfsfm13	mRNA	19.3317	25.84	0.47	0.85	1.47	0.54	1.47	0.94	0.63	0.36	0.961183
320910	Itgb8	mRNA	0.5	0.25	0	0	0.02	0	0	0.05	0	0	0.961183
140500	Acap3	mRNA	325.5	329.5	4.24	5.84	6.17	5.84	5.34	7.18	3.39	7	0.922508
15931	Ids	mRNA	251.667	466	5.5	8.58	9.11	3.57	3.49	5.34	2.43	2.99	0.111136
108168478	Gm14853	pseudo	0.5	0.5	0.08	0	0.09	0	0	0.09	0.09	0.08	0.961183
72141	Adpgk	mRNA	1703.17	1631.25	38.46	48.72	46.05	53.14	43.47	56.35	44.96	53.07	0.567116
17883	Myh3	mRNA	6.5	27.75	0.02	0.14	0.8	0.3	0.03	0.02	0	0.14	0.207323
230734	Yrdc	mRNA	795.5	863.75	63.64	30.6	31.25	37.31	31.25	37.49	39.9	41.43	0.981678
14793	Cdca3	mRNA	1119.83	1214.75	63.83	56.61	53.07	60.4	58.6	51.1	54.66	65.43	0.956746
18507	Pax5	mRNA	1.33333	1.25	0	0	0.06	0.12	0.06	0	0	0.02	0.961183
17922	Myo7b	mRNA	0.666667	1.5	0.01	0.03	0.01	0.01	0	0	0.01	0.01	0.826008
30925	Slamf6	mRNA	46.5	39.75	0.39	0.91	1.62	1.24	3.38	1.2	0.67	1.07	0.690816
22642	Zbtb17	mRNA	320.833	328	9.81	6.09	6.94	7.96	10.3	6.95	8.36	9.71	0.725576
269952	Gdpgp1	mRNA	144.003	152.028	1.56	3.37	3.23	3.91	3.21	3.17	2.21	3.43	0.956619
100039053	Gm2023	mRNA	6.83167	5.3275	0	0.41	1.11	0.47	0	1.78	0.33	0.52	0.958233
100033459	Ifi208	mRNA	62.8433	40.8975	0.14	0.53	1.02	2.18	4.03	2.29	0.8	1.23	0.367426
67939	Prorsd1	mRNA	138.833	156	5.65	5.55	5.82	4.7	5.11	4.2	5.31	4.99	0.971062
269053	Gpr152	mRNA	4.83333	5	0	0.07	0.14	0.14	0.14	0.15	0.07	0.07	0.950642
19015	Ppard	mRNA	640	649.25	12.25	14.93	12.63	16.77	19.69	17.24	10.73	15.17	0.575908
18072	Nhlh2	mRNA	0.333333	0	0	0	0	0	0.06	0	0	0	0.942557
54353	Skap2	mRNA	434.667	484	20.85	22.18	25.08	18.26	22.69	23.63	16.25	18	0.992335
13124	Cyp8b1	mRNA	0.166667	1	0	0.04	0.11	0	0.04	0	0	0	0.938045
60363	Cldn15	mRNA	16.3333	22	0.54	0.44	1.98	0.5	0.23	1.1	0.12	0.83	0.862156
242667	Dlgap3	mRNA	0.5	0.25	0	0	0.02	0	0	0.03	0.02	0.03	0.920519
329679	Fnip2	mRNA	614.435	649.01	4.93	6.31	6.31	7.6	11.17	6.12	4.53	5.64	0.792948
69917	Nabp2	mRNA	771.167	779	64.91	53.22	51.97	52.43	54.13	56.1	48.96	68.38	0.899717
12567	Cdk4	mRNA	4537.83	4529.5	226.83	277.89	254.28	251.95	219.18	286.66	221.44	294.54	0.776514
653016	Mymx	mRNA	0.333333	1.5	0	0.4	0.2	0	0	0	0	0	0.787909
19225	Ptgs2	mRNA	211	124	0.84	1.98	1.82	3.06	7.55	2.42	3.62	2.56	0.108416
237858	Trarg1	mRNA	5.5	7.5	0.02	0.04	0.48	0.11	0.13	0.35	0	0.04	0.961183
14705	Bscl2	mRNA	510.015	522.472	19.21	21.33	26.05	28.77	24.94	29.31	23.47	27.43	0.603793
237898	Usp32	mRNA	587.667	769.25	5.73	9.06	9.34	6.39	6.41	7.16	4.31	5.02	0.403359
16493	Kcna5	mRNA	1.5	2.5	0.05	0.02	0.12	0.05	0	0	0	0.11	0.929095
17752	Mt4	mRNA	16.8333	11	2.3	1.29	0.77	6.63	9.77	1.36	4.6	5.39	0.5954
228602	4930402H24Rik	mRNA	278.23	328	2.12	4.18	4.03	3.45	3.56	3.78	2.49	2.43	0.95853
76938	Rbm17	mRNA	2044.33	2207.75	132	89.25	89.09	111.73	110.99	99.47	114.22	103.24	0.909321
239611	Muc19	mRNA	0.5	1.25	0.03	0.01	0	0	0.01	0	0	0	0.871094
14659	Glrp1	mRNA	3.16667	4	0	0.22	0.07	0.29	0.11	0.12	0.11	0.14	0.972955
108168208	Gm45521	mRNA	0.166667	0.5	0	0	0.09	0	0	0	0	0	0.950642
353310	Zfp703	mRNA	363.5	398.75	7.25	6.93	10.48	10.58	11.07	7.76	8.37	9.19	0.838487
66557	Bpifb2	mRNA	8.66667	4.5	0.21	0.21	0.14	0.41	0.67	0.45	0.57	0.34	0.424859
93686	Rbfox2	mRNA	1609.67	1872.5	13.96	22.7	21.43	24.54	18.91	20.28	14.89	21.19	0.991997
68188	Sympk	mRNA	1791.5	2172.75	34.98	38.08	38.85	34.57	35.46	32.71	27.03	37.81	0.956451
20448	St6galnac4	mRNA	547.667	564.5	8.64	8.76	9.82	15.26	18.98	9.46	11.51	11.27	0.556493
20392	Sgce	mRNA	15.5	31.75	0.67	1.65	2.81	0.34	1.07	1.21	0.09	0.33	0.625713
21822	Tgtp1	mRNA	1718.33	765.753	2.05	19.83	18.87	35.95	121.1	19.5	57.96	44.02	0.223693
16528	Kcnk4	mRNA	3.33333	4.75	0.07	0.2	0.11	0.19	0.07	0.31	0.15	0.04	0.99993
97820	4833439L19Rik	mRNA	1381.5	1966.75	67.83	54.17	55.06	45.03	46.36	52.38	39.56	49.73	0.309482
235661	Dync1li1	mRNA	613.167	975.75	37.7	36.88	35.84	26.81	23.18	26.08	19.82	19.8	0.0468176
109212	Pimreg	mRNA	629	596.5	25.43	30.87	25.01	40.49	32.75	36	31.62	34.98	0.552632
66590	Farsa	mRNA	1166.33	1252.25	55.69	49.88	47.22	47.16	52.27	51.12	47.57	52.3	0.798341
18845	Plxna2	mRNA	20.6667	38.75	0.2	0.26	0.36	0.15	0.11	0.21	0.04	0.13	0.353593
213819	Casd1	mRNA	330.167	396	3.49	9.54	9.67	6.44	4.12	8.94	3.06	5.47	0.718933
74191	P2ry13	mRNA	54.1667	44	0.22	1.43	1.93	1.37	1.95	3.06	1.24	0.71	0.712732
223664	Lrrc14	mRNA	735.667	782.25	19.85	23.97	21.97	31.72	24.84	25.44	26.12	25.9	0.86705
235567	Dnajc13	mRNA	1220.83	2025.25	11.69	21.94	23.6	15.09	12.55	13.03	8.54	10.82	0.0799667
338368	Pheta2	mRNA	41.5	40.5	0.49	1.31	0.88	1.49	1.02	1.53	0.56	0.82	0.998554
100039953	Gfy	mRNA	0.166667	0	0	0	0	0	0.04	0	0	0	0.961183
245631	Mum1l1	mRNA	65.3333	96	1.47	2.28	1.36	0.98	1.91	0.99	0.82	0.73	0.67472
67880	Dcxr	mRNA	119.667	137.5	12.9	10.69	11.16	11.55	14.29	12.82	8.78	11.31	0.927191
15247	Mfsd14a	mRNA	1909	2216	58.7	59.08	57.27	50.89	37.75	54.63	52.43	43.27	0.806912
209601	Erich3	mRNA	0.5	0.5	0	0.04	0	0.04	0	0	0.04	0	0.961183
26458	Slc27a2	mRNA	0	0.25	0	0	0	0.03	0	0	0	0	0.961183
100043876	Gm4705	pseudo	5.845	3.32	0.42	0.39	0.71	1.2	0.58	0.74	2.2	1.52	0.708468
56175	Bace2	mRNA	5.66667	9.25	0.09	0.22	0.26	0.15	0.17	0.12	0.15	0.11	0.904392
230126	Shb	mRNA	645.833	567	20.65	10.78	12.6	14.27	16.93	17.1	17.23	18.84	0.54758
70432	Rufy2	mRNA	836.89	906.655	8.79	9.83	9.19	8.86	7.84	8.58	6.89	7.35	0.836805
26385	Grk6	mRNA	1983.5	2475.5	78.15	65.04	60.44	56.58	55.59	64.51	50.82	74.81	0.855457
244654	Mtss1l	mRNA	47.1667	55.5	0.35	0.58	1.11	1.04	0.89	0.71	0.49	0.67	0.961183
69482	Nup35	mRNA	509	508.75	7.07	16.64	15.27	13.76	12.83	12.11	12.57	14.69	0.935194
66492	Zmat2	mRNA	1504.83	1600.25	51.81	49.53	46.4	54.6	50.74	50.89	50.08	49.97	0.860183
68545	Ecscr	mRNA	549.833	407.5	17.8	24.67	20.4	34.04	44.3	40.21	32.44	34.6	0.027406
108168952	108168952	mRNA	0.166667	0.25	0	0.01	0.01	0	0	0.01	0	0
108167344	Gm45951	mRNA	602.63	568	6.77	16.58	12.42	12.75	14.92	15.88	11.72	17.55	0.684536
28240	Trpm2	mRNA	81.8333	94.5	0.27	1.62	2.35	1.1	2.75	2.07	0.78	0.55	0.961183
66979	Pole4	mRNA	1580.5	1278	74.39	63.34	59.06	71.94	74.32	76.08	84.82	90.55	0.0790584
74202	Fblim1	mRNA	365.333	281.75	4.38	6.45	5.79	9.31	12.74	13.08	6.08	6.6	0.224682
12268	C4b	mRNA	634.035	1861.9	6.23	33.63	50.97	5.4	15.61	12.42	4.99	3.39	0.436137
67457	Frmd8	mRNA	668.667	676.75	13.6	17.4	15.93	16.12	18.14	19.64	13.12	14.64	0.645221
67226	Tmem19	mRNA	447.333	569	14.21	14.02	13.96	10.4	9.52	13.37	8.62	9.03	0.415646
14857	Gsta1	mRNA	53.095	30.0525	3.56	1.22	0.74	5.38	12.98	4.41	1.57	8.66	0.307003
210757	Themis	mRNA	19.5	20.25	0.1	0.34	0.47	0.23	0.53	0.44	0.2	0.25	0.87842
103537	Mbtd1	mRNA	466	741.75	11.9	10.76	10.55	7.1	5.28	7.28	4.4	5.95	0.0449798
26992	Brd7	mRNA	392.167	397.75	9.89	11.32	12.78	12.36	14.65	12.54	11.62	11.02	0.482439
632687	2021-03-10	mRNA	0	0.25	0	0	0	0.02	0	0	0	0	0.961183
75647	Ssmem1	mRNA	1	0.75	0.11	0.09	0	0	0.05	0	0.11	0	0.992335
14630	Gclm	mRNA	818	746.75	24.2	23.86	24.62	30.65	39.58	23.83	24.72	37.73	0.364678
21354	Tap1	mRNA	394.667	444	3.3	12.56	16.55	10.13	25.46	8.91	3.18	8.36	0.952194
108169102	Gm42627	pseudo	6.5	4.75	1	0.58	0.58	0.56	0.83	0.46	1.31	0.97	0.873538
22353	Vip	mRNA	0.333333	0	0	0	0	0	0	0.1	0	0	0.940082
66237	Atp6v1g2	mRNA	25.3333	22.75	0.28	1.5	1.73	1.26	1.25	2.84	0.63	1.09	0.923701
67212	Mrpl55	mRNA	490.667	458.25	44.23	34.4	29.99	40.62	42.16	39.2	40.38	44.84	0.614686
69823	Fyttd1	mRNA	1404.33	1534.75	33.54	35.49	32.26	31.08	31.92	30.07	28.5	27.77	0.942557
108167482	Gm46011	mRNA	0.166667	0	0	0	0	0	0	0	0.03	0	0.961183
223776	Selenoo	mRNA	224.712	251.368	8.35	8.12	6.88	6.99	6.17	8.7	6.85	7.93	0.961183
268949	Mucl3	mRNA	12.1667	30.5	0.95	1.52	1.33	0.24	0.38	0.5	0.15	0.41	0.201988
71722	Cic	mRNA	1061.67	1447.75	11.28	16.36	17.08	15.05	11.18	16.26	6.47	13.76	0.588111
213068	Tmem71	mRNA	41.6667	52.5	1.29	1.29	1.41	1.06	1.63	1.32	0.82	0.75	0.961183
94067	Mrpl43	mRNA	1030.79	1000.1	69.41	60.75	55.57	62.17	64.2	65.74	65.69	69.64	0.625299
69195	Tmem121	mRNA	2.16667	1.5	0.05	0.05	0.09	0.09	0.18	0.1	0	0.09	0.961183
68515	Myadml2	mRNA	1.16667	11.25	0.25	0.06	0.62	0.45	0	0	0.04	0.07	0.0538617
215476	Prr14l	mRNA	630.667	930.75	5.64	7.98	7.33	4.84	4.28	5.07	2.8	4.86	0.12017
99326	Garnl3	mRNA	130.333	168.5	4.02	2.85	3.34	3.09	3.41	3.31	1.74	2.78	0.795175
68270	Dnaaf1	mRNA	1.64667	1.4825	0.06	0.03	0.06	0	0.06	0.03	0.13	0	0.950642
69930	Zfp715	mRNA	278.333	276.75	4.06	5.04	4.8	4.77	6.76	4.94	4.94	4.24	0.553833
71947	Tmem94	mRNA	421.667	429.25	2.44	6.49	6.39	8.47	6.43	6.99	4.45	6.67	0.92664
66686	Dcbld1	mRNA	87	105.5	2.28	2.56	2.5	2.73	2.55	2.9	1.61	2.7	0.952433
27084	Xlr5c	mRNA	0	0.25	0.08	0	0	0	0	0	0	0	0.961183
226245	Plekhs1	mRNA	6.16667	3.75	0.18	0.15	0.04	0.07	0.41	0.48	0.34	0.02	0.531834
72947	Phykpl	mRNA	154.725	168.455	6.33	7.25	5.87	6.04	6.07	7.09	5.07	5.77	0.992335
16452	Jak2	mRNA	581.5	792.25	10.1	14.1	13.82	9.79	11.48	12.4	6.77	7.96	0.455494
228829	Phf20	mRNA	942.667	1139.75	12.63	15.22	15.11	12.59	12.32	13.52	11	12.05	0.624304
217169	Tns4	mRNA	191.5	139.25	0.65	1.46	2.13	3.83	2.37	3.16	2.37	3.91	0.477183
244183	Trim30b	mRNA	5.76167	5.6875	0.05	0.13	0.13	0.27	0.17	0.29	0.16	0.17	0.811172
76571	Styxl1	mRNA	2.5	1.5	0.13	0.09	0.04	0.05	0.33	0.22	0.04	0	0.870071
668727	Mrgpra2a	mRNA	2.49167	1.9525	0.07	0.12	0.29	0	0.22	0.45	0	0.06	0.927696
100529082	Gm11127	mRNA	354.29	230.955	13.12	10.33	10.54	16.97	15.39	21.47	20.88	18.92	0.103721
22341	Vegfc	mRNA	6.83333	14.25	0.15	0.62	1.28	0.15	0.63	0.25	0.12	0.15	0.755333
105244931	Gm40453	mRNA	1.625	1.0425	0	0	0.18	0.15	0.14	0.1	0.12	0.32	0.825253
629242	Gm6958	mRNA	1236.5	951	8.19	18.92	16.28	27.16	23.54	26.21	15.37	36.85	0.307003
66246	Osgep	mRNA	258.833	237	9.69	11.28	12.37	9.83	13.8	13.33	9.77	11.63	0.360828
15366	Hmmr	mRNA	941.583	1285	17.13	25.03	22.57	26.75	16.66	17.83	15.72	18.8	0.308056
109032	Sp110	mRNA	131.51	125.995	1.13	4.05	6.13	7.83	5.02	9.52	3.79	5.99	0.757708
11754	Aoc3	mRNA	96	116.75	1.26	2.83	4.11	1.92	3.07	4.14	1.22	1.61	0.961183
72413	Kcnmb2	mRNA	0.333333	0	0	0	0	0	0	0	0.07	0	0.929095
216157	Tmem259	mRNA	1952.83	1957.5	80.66	52.96	52.38	64.66	69.24	76.07	57.04	78.86	0.646215
94090	Trim9	mRNA	2.16667	3.5	0.02	0.08	0.05	0.06	0.05	0.05	0	0.03	0.891825
330319	Wipf3	mRNA	0.5	7.75	0.07	0.1	0.1	0.23	0	0	0	0	0.0322694
68268	Zdhhc21	mRNA	694.167	1066.25	8.38	9.65	8.8	6.76	5.05	7.05	4.15	4.77	0.029493
106581	Fam234a	mRNA	547.667	527.75	9.27	12.27	15.83	15.5	23	14.75	10.82	13.68	0.55239
57785	Rangrf	mRNA	970.333	759.75	65.62	67.91	74.45	82.01	79.8	102.76	80.71	111.92	0.0801047
21341	Taf1c	mRNA	334.02	319.267	10.02	5.62	5.8	7.54	9.47	8.52	5.78	10.58	0.685304
229706	Slc6a17	mRNA	2.16667	2	0.01	0.06	0.02	0	0.07	0.04	0	0	0.978961
68054	Serpina12	mRNA	0.166667	0.25	0	0	0	0.02	0	0.02	0	0	0.992335
434756	Akap14	mRNA	0.5	0.75	0.08	0.04	0	0	0	0	0.08	0.04	0.992335
216892	Spns2	mRNA	218.167	234	5.71	4.86	5.4	5.76	7.07	5.88	5.73	5.11	0.627179
70615	Ankrd24	mRNA	183.167	144.25	1.68	2.42	2.46	3.8	3.96	3.95	2.77	5.17	0.300062
78252	Nxpe2	mRNA	2.16667	1.25	0.03	0.09	0.05	0.02	0.08	0.09	0.05	0.06	0.792209
319997	A630001G21Rik	mRNA	17.8333	26.25	0.44	1.44	2.15	0.78	0.86	0.91	0.46	0.62	0.711175
192653	Ttc36	mRNA	0.833333	0.25	0.11	0	0	0	0.1	0.23	0.11	0.1	0.725246
22171	Tyms	mRNA	1315.56	1147.6	19.32	22.47	19.77	22.77	22.36	23.53	22.09	28.98	0.286264
229937	Znhit6	mRNA	792.833	812.25	62.37	43.74	39.5	49.36	51.4	48.49	61.68	54.29	0.713618
64654	Fgf23	mRNA	25.1667	54.75	2.37	1.41	1.48	0.49	0.96	0.87	0.73	0.53	0.426318
67345	Herc4	mRNA	1674.83	2163.5	37.79	45.87	42.22	29.68	30.62	35.86	29.44	31.88	0.458192
381290	Atp2b4	mRNA	32.8333	39.5	0.09	0.46	0.59	0.19	0.33	0.55	0.13	0.24	0.996764
78921	9130019O22Rik	mRNA	13.6467	15.7825	0.18	0.4	0.4	0.16	0.42	0.35	0.11	0.18	0.996632
170735	Arr3	mRNA	0.166667	0	0	0	0	0	0	0.03	0	0	0.961183
23797	Akt3	mRNA	519.348	494.408	3.01	7.4	7.19	7.2	8.05	6.64	8.53	5.4	0.602796
57914	Crlf2	mRNA	188.667	183.75	11.27	9.33	9.07	11.39	11.69	12.69	9.62	10.49	0.692527
27083	Xlr4b	mRNA	267.013	293.873	22.54	19.38	17.67	13.24	13.97	18.48	15.16	17.14	0.961183
102693	Phldb1	mRNA	1053	1239.25	22.12	17.33	17.16	16.03	16.17	20.81	14.83	16.96	0.950642
109700	Itga1	mRNA	99.8333	110	0.48	1.59	1.49	1.51	1.34	1.84	0.72	1.16	0.961183
110891	Slc8a2	mRNA	1	0.75	0.02	0.02	0.02	0	0.03	0	0.02	0	0.992335
231769	Sfswap	mRNA	873.667	1178.25	27.56	18.66	19.08	16.63	17	15.56	10.5	18.71	0.675021
56349	Net1	mRNA	1523.83	1910	31.47	30.08	34.39	40.4	33.4	24.94	29	28.46	0.830349
230085	Phf24	mRNA	0.333333	3.75	0	0.04	0.05	0.04	0	0	0	0	0.348815
72656	Ints8	mRNA	692.293	668.885	12.54	14.48	13.31	10.44	12.45	14.58	9.99	12.58	0.765189
22763	Zfr	mRNA	1717.17	2230.5	36.71	36.4	33.78	28.67	26.14	29.52	27.76	25.75	0.526065
52184	Odf2l	mRNA	438.667	548	16.32	14.18	12.38	13.66	11.83	12.35	12.25	12.11	0.772249
68010	Bambi	mRNA	8.5	12	0.08	0.15	0.32	0.11	0.23	0.22	0.08	0.07	0.991561
80707	Wwox	mRNA	145.333	234.5	9.66	7.6	8.24	6.41	4.6	6.05	5.17	5.42	0.217023
78506	Micu3	mRNA	84.6667	110	2.37	2.7	2.54	1.43	2.04	2.01	1.59	1.64	0.762604
19260	Ptpn22	mRNA	207	201.75	2.69	7.82	6.12	3.76	5.73	8.47	5.94	3.04	0.81734
80880	Kank3	mRNA	140.833	149	2.89	4.51	4.5	3.56	3.83	4.76	2.41	2.81	0.961183
30957	Mapk8ip3	mRNA	1556	1584.25	22.63	15.75	16.58	24.39	24.9	21.25	18.14	25.87	0.608064
16978	Lrrfip1	mRNA	3545.17	4849	113.54	97.6	93.69	64.43	58.28	72.53	77.36	53.9	0.451103
243771	Parp12	mRNA	404.167	411	3.65	7.88	10.5	13.62	14.03	10.8	10.96	8.09	0.600368
18563	Pcx	mRNA	93.1667	130	2.57	1.67	2.36	2.13	2.87	1.49	1.12	1.8	0.888704
108168152	Gm8126	mRNA	0.961667	1.5	0	0.14	0	0.18	0.08	0.08	0.09	0.04	0.992335
12727	Clcn4	mRNA	454.667	432	4.08	7.69	9.1	7.58	7.39	9.01	5.7	6.14	0.956607
51796	Srrm1	mRNA	2639.33	3650.25	75.36	56.64	60.77	60.35	60.71	47.41	43.78	50.84	0.598777
74309	Osbp2	mRNA	28.1667	40.25	0.86	0.62	0.64	0.91	1.08	0.42	0.38	1.02	0.953963
67472	Mtfr1	mRNA	1132.5	1281.25	32.54	33.18	29.82	30.4	27.92	28.72	29.98	28.49	0.961183
56690	Mlycd	mRNA	103.667	94.25	2.1	2.84	2.91	4.88	4.48	4.55	3.27	3.93	0.469118
20585	Hltf	mRNA	452	539	9.5	8.51	8.42	7.44	6.96	9.37	6.57	7.65	0.888468
23985	Slc26a4	mRNA	0	0.25	0.02	0	0	0	0	0	0	0	0.961183
11298	Aanat	mRNA	0	0.75	0	0	0.06	0.1	0	0	0	0	0.906397
68796	Tmem214	mRNA	1745.33	1881.75	57.98	44.79	45.43	50.13	51.74	53.41	53.06	55.36	0.867552
20088	Rps24	mRNA	35813.8	25837	2880.96	2163.41	2061.64	2575.59	3399.68	2729.95	4651.75	3437.16	0.116319
110616	Atxn3	mRNA	285.833	410.25	5.05	7.64	6.12	4.47	3.84	4.83	3.49	3.09	0.142623
20301	Ccl27a	mRNA	80.1917	53.52	6.13	9.14	8.42	18.15	9.67	16.38	24.65	14.36	0.415223
72927	Hepacam	mRNA	0.166667	0.5	0.03	0.03	0	0	0	0	0	0.02	0.961183
104709	Pik3r6	mRNA	29.5	48.5	0.3	1.16	1.85	0.98	0.98	0.86	0.2	0.69	0.711152
225651	Mppe1	mRNA	674.133	583.577	15.09	16.2	17.46	28.72	20.64	23.92	27.28	24.34	0.409539
20355	Sema4f	mRNA	4.33333	8.5	0.14	0.12	0.29	0.07	0.11	0	0.06	0.09	0.616707
100126824	Sco2	mRNA	593.138	542.105	34.76	36.43	36.95	35.31	34.67	43.04	47.2	37.59	0.439602
216350	Tspan8	mRNA	45.8333	52.75	4.82	2.87	3.83	3.65	1.95	4.08	3.03	1.55	0.781831
14710	Gngt2	mRNA	123.667	86.25	1.99	20.59	10.07	12.59	26.78	22.64	23.62	13.87	0.293492
241201	Cdh7	mRNA	0.166667	0	0	0	0	0	0	0	0	0.02	0.961183
67416	Armcx2	mRNA	25.8333	23.25	0.1	0.76	0.66	0.37	0.67	1.03	0.19	0.16	0.961183
72154	Zfp157	mRNA	215.333	277	3.86	3.49	3.16	3.28	3.41	2.96	2.7	2.56	0.707739
227099	Pms1	mRNA	165.833	260	5.78	6.92	7.09	4.09	4.22	4.21	3.76	4.55	0.285632
67444	Ilkap	mRNA	1152.44	943.125	53.63	43.15	40.52	58.3	67.79	59.59	65.47	63.97	0.165647
18162	Npr3	mRNA	2.83333	10	0.02	0.01	0.2	0.18	0.01	0.12	0	0.01	0.621335
108903	Tbcd	mRNA	379.927	628.587	13.78	11.4	11.55	8.24	9.77	8.1	5.8	8	0.190094
104836	Cbll1	mRNA	583.833	673.25	12.94	10.98	11.09	11.7	9.43	11.66	9.29	10.68	0.865886
66871	Cpne8	mRNA	61.4417	74.255	4.42	5.53	8.45	3.98	4.78	8.29	4.91	5.45	0.950642
243374	Gimap8	mRNA	46	42.75	0.29	1.13	1.22	0.68	1.07	1.42	0.55	0.84	0.859886
109575	Tbx10	mRNA	0.333333	0.75	0.07	0	0	0.03	0	0	0.04	0	0.952207
14702	Gng2	mRNA	298.833	295.25	1.53	5.23	7.5	8.11	11.07	7.63	5.06	4.02	0.739978
192231	Hexim1	mRNA	559.667	567	8.91	11.61	12.48	13.67	10.91	11.79	13.12	10.65	0.887829
238161	Akap6	mRNA	13.6667	30	0.11	0.07	0.26	0.29	0.12	0.03	0.03	0.09	0.228462
629378	Dact3	mRNA	33.1667	37.75	1.37	0.89	0.76	0.76	1.35	1.32	0.59	0.68	0.961183
381113	Cdkl4	mRNA	6.83333	8.5	0.08	0.35	0.3	0.13	0.17	0.16	0.16	0.14	0.950642
20321	Frrs1	mRNA	1082.83	990	10.4	14.96	15.23	29.49	25.36	17.36	20.98	16.31	0.611282
209334	Gen1	mRNA	268.998	374.25	4.47	8.82	8.48	6.49	6.26	6.06	3.56	5.91	0.503372
51869	Rif1	mRNA	1292.33	1687.75	8.42	16.65	13.54	12.31	8.81	10.14	9.34	9.97	0.482984
16621	Klkb1	mRNA	0.833333	0	0	0	0	0	0.03	0	0	0.01	0.890499
245828	Trappc1	mRNA	629.833	542.5	51.3	62.6	58.21	63.98	62.92	77.43	49.79	69.95	0.400569
11966	Atp6v1b2	mRNA	1340.17	1726.75	32.79	48.52	51.29	45.58	49.39	41.88	29.79	27.15	0.779027
77794	Adamtsl2	mRNA	0.166667	6.5	0	0	0.57	0	0	0.03	0	0	0.493821
100502698	Rubcn	mRNA	561.833	715	6.52	11.29	11.62	8.57	7.53	8.7	5.3	8.84	0.690266
12475	Cd14	mRNA	217.667	337	23.04	11.82	16.51	7.91	12.82	14.1	8.48	7.06	0.62699
22755	Zfp93	mRNA	109.667	117.25	1.45	2.45	1.93	3.39	1.76	2.82	2.73	1.66	0.961183
11308	Abi1	mRNA	1114.9	1266.12	24.43	28.96	31.75	22.82	30.11	31.75	20.22	21.44	0.990636
13544	Dvl3	mRNA	488.5	673	8.93	11.43	10.61	10.39	7.83	8.99	5.28	7.73	0.21928
14375	Xrcc6	mRNA	1142.67	1309.75	42.27	45.88	42.52	39.11	36.06	38.89	35.09	48.7	0.950642
78248	Armcx1	mRNA	10.6667	14.5	0	0.62	0.83	0.32	0.54	0.36	0.17	0.32	0.961183
19325	Rab10	mRNA	3486.46	3778.12	68.45	80.53	80.44	71.66	72.13	75.75	69.64	70.84	0.94263
331524	Xkrx	mRNA	2	9.75	0.41	0.19	0.26	0.14	0.07	0.07	0.08	0.05	0.219935
59046	Arpp19	mRNA	1650.83	1588	30.81	25.33	24.49	30.03	25.19	27.47	30.15	32.58	0.794625
66510	Rnf181	mRNA	959.833	821.25	42.36	40.76	43.1	48.6	65.7	56.27	53.69	55.23	0.0236915
69129	Pex11g	mRNA	48.6667	48	1.73	2.4	1.91	3.61	2.77	2.81	2.86	2.96	0.870941
53374	Chst3	mRNA	2.16667	4.25	0.02	0.04	0.08	0.04	0.03	0.02	0	0.05	0.887944
105244063	Gm39743	mRNA	699.24	805.442	56.23	22.67	19.34	17.87	22.14	32.19	19.09	31.42	0.961183
93765	Ube2n	mRNA	2665.67	2521.5	97.37	104.4	95.93	85.52	92.1	117.43	93.11	117.41	0.637697
108168727	Gm46725	mRNA	2.33333	0.75	0	0.02	0	0.04	0.04	0	0.07	0.06	0.796262
94212	Pag1	mRNA	28	59.75	0.3	0.52	0.93	0.33	0.5	0.27	0.18	0.23	0.471225
18181	Nrf1	mRNA	628.213	834.22	19.21	22.32	22.03	20.78	19.71	16.17	17.71	19.75	0.376808
114715	Spred1	mRNA	1049.67	1259	11.26	15.83	16.45	11.79	11.99	13.9	9.28	10.95	0.658673
216974	Proca1	mRNA	11.5	5	0.09	0.26	0.31	0.52	0.68	0.57	0.23	1.4	0.479503
80334	Kcnip4	mRNA	1.16667	1.75	0.03	0.1	0.07	0.03	0.09	0.07	0	0	0.961183
104086	Cyp27a1	mRNA	31.1667	64	0.25	2.16	5.53	1.41	1.77	1.84	0.34	0.76	0.62699
74039	Nfam1	mRNA	117.333	242.25	0.88	5.59	8.33	2.43	2.98	3.13	0.96	1.81	0.417844
404634	H2afy2	mRNA	20.8817	19.94	0.48	0.58	0.85	0.93	1.42	1.06	0.31	0.81	0.828964
320633	Zbtb26	mRNA	305.167	284.25	0.82	5.02	4.27	4.82	3.53	4.41	3.46	4.18	0.937834
18223	Numbl	mRNA	111.5	157	4.01	3.61	4.38	4	4.29	4.55	1.76	2.59	0.772239
14184	Fgfr3	mRNA	106.833	135	2.04	2.57	2.11	2.39	1.95	2.75	1.54	1.82	0.950642
320208	Tmem91	mRNA	9.00167	13.75	0.92	0.36	0.23	0.45	0.43	0.32	0.19	0.27	0.848626
74203	Eif4enif1	mRNA	1477.33	1847.25	35.82	36.7	34.04	33.81	27.9	32.59	24.72	33.67	0.642835
72982	Tmem138	mRNA	217.53	183.205	8.05	10.59	9.46	9	12.1	13.93	10.75	10.63	0.0801047
321007	Serac1	mRNA	300.667	364.897	4.27	5.34	5.06	3.83	3.89	4.46	2.55	4.13	0.637943
12982	Csf2ra	mRNA	163.638	187.298	2.63	7.7	9.64	7.99	14.46	9.12	1.77	4.5	0.956269
19736	Rgs4	mRNA	28.6667	30	0.5	1.07	1.11	0.21	0.65	1.06	0.32	0.46	0.961183
54169	Kat6b	mRNA	487.833	766.75	5.85	8.72	8.46	5.39	4.48	6.2	2.54	5.23	0.213518
18861	Pms2	mRNA	599.667	633	14.65	13.3	12.92	14.29	15.77	11.2	14.19	16.16	0.798341
227394	Slco4c1	mRNA	0.333333	0.75	0	0.03	0.01	0	0	0	0.03	0	0.987186
108961	E2f8	mRNA	840.5	1157.25	24.06	24.11	21.39	22.78	19.57	20.51	12.36	19.5	0.300459
77531	Anks1b	mRNA	0.833333	2.75	0.08	0.08	0.02	0	0	0	0.04	0.02	0.762439
226432	Ipo9	mRNA	1090.5	1627.75	14.08	20.5	21.85	17.47	13.71	14.82	10.38	13.1	0.0641959
751865	Sap25	mRNA	106.667	107.5	6.8	7.37	8.13	8.55	7.35	8.27	3.38	11.75	0.961183
70790	Ubr5	mRNA	7334.33	10866.5	87.27	94.44	96.37	83.62	70.63	71.03	62.38	65.88	0.00206445
68279	Mcoln2	mRNA	29.1667	69.25	1.89	2.59	2.45	0.86	1.45	1.28	0.44	0.43	0.243807
53320	Folh1	mRNA	0.5	2.25	0	0.07	0.17	0	0	0.05	0	0	0.84035
74270	Usp20	mRNA	171.333	227	3.99	3.24	3.26	4.65	3.77	3.24	2.12	3.08	0.706195
73032	Ttc9b	mRNA	0	0.5	0.09	0	0	0.08	0	0	0	0	0.950642
57373	Akip1	mRNA	221	213.25	19.34	15.4	14.83	19.23	20.52	16.15	18.99	21.98	0.61598
67729	Mansc1	mRNA	9.66667	11	0.09	0.3	0.7	0.23	0.61	0.61	0.12	0.06	0.961183
12305	Ddr1	mRNA	533.833	455	5.68	7.45	8.23	12.69	15.23	9.25	11.16	10.25	0.307017
18121	Nog	mRNA	97.6667	55.25	1.05	0.5	1.71	4.96	2.94	1.9	4.17	7.46	0.379172
70297	Gcc2	mRNA	269.333	456.25	4.5	6.07	5.29	3.73	3.14	3.74	2.37	2.48	0.0265416
102641467	Gm20684	mRNA	0.166667	0.25	0	0	0.03	0	0	0.03	0	0	0.992335
100861640	Rhox4a2	mRNA	0.333333	0	0	0	0	0	0.24	0	0	0	0.942557
109689	Arrb1	mRNA	445.833	657	2.29	9.67	9.77	4.14	3.31	7.24	2.06	4.27	0.62264
83767	Wasf1	mRNA	116.333	129.75	3.6	3.65	2.99	3.79	2.85	3.21	2.46	3.37	0.805425
56444	Actr10	mRNA	1113.5	1279.28	28.1	22.28	20.64	17.58	18.61	19.86	20.32	21.44	0.961183
66473	Ctrb1	mRNA	0.5	0.25	0	0.09	0	0	0	0.19	0	0	0.961183
12919	Crhbp	mRNA	15.3333	14.75	0.39	1.15	0.53	0.51	0.13	1.4	0.36	0.38	0.97092
16656	Hivep3	mRNA	26	45.5	0.79	1.26	3.35	0.41	0.51	0.28	0.16	0.39	0.699471
100503085	Klhl3	mRNA	0.833333	0.75	0	0.03	0.02	0.03	0.05	0.11	0	0	0.950642
18806	Pld2	mRNA	700.667	764.75	15.66	13.4	14	15.24	16.63	16.28	11.73	14.36	0.895949
216238	Eea1	mRNA	845	1117.5	10.06	9.11	8.7	11.14	11.18	7.28	7.01	8.2	0.874448
224432	Scaf4	mRNA	561.667	791.25	10.69	13.86	13.78	13.21	10.17	10.24	6.31	11.39	0.165546
74841	Usp38	mRNA	536.833	656.25	12.88	12.19	11.82	10.2	11.63	11.81	11.13	11.99	0.662077
239731	Rimbp3	mRNA	20.8333	31.25	0.37	0.38	0.36	0.36	0.26	0.33	0.18	0.31	0.728899
18081	Ninj1	mRNA	1512.67	1374	83.93	83.66	99.08	101.26	158.24	127.16	85.23	88.83	0.237613
19024	Ppfibp2	mRNA	21.5	23.75	0.12	0.52	0.88	0.54	1.05	0.8	0.45	0.09	0.961183
77593	Usp45	mRNA	602.833	827.25	9.45	10.43	10.38	8.26	6.8	7.94	5.15	7.69	0.122933
217463	Snx13	mRNA	229	388.5	3.68	4.88	5.64	3.24	3.47	3.34	2.14	1.92	0.131297
193385	Ripor2	mRNA	45.5	71.0425	0.67	1.42	1.77	0.41	0.73	0.93	0.51	0.53	0.486959
19128	Pros1	mRNA	102.5	344.5	1.83	11.43	16.57	1.23	3.76	4.14	1.22	0.68	0.374599
16859	Lgals9	mRNA	833	723	15.76	26.46	31.78	67.49	64.68	57.37	47.29	41.54	0.323809
140765	Tmprss3	mRNA	0	0.25	0	0	0	0.03	0	0	0	0	0.961183
19328	Rab12	mRNA	977.333	1125.5	58.7	35.44	36.68	37.94	42.62	43.38	35.2	38.88	0.962124
93877	Pcdhb6	mRNA	0	0.25	0	0	0.03	0	0	0	0	0	0.961183
22025	Nr2c1	mRNA	277.833	273.5	3.38	4.67	5.32	6.04	6.34	4.63	5.03	4.97	0.709245
19364	Rad51d	mRNA	326.667	317.25	5.35	8.42	8.4	10.83	10.73	11.07	7.76	10.12	0.558127
13972	Gnb1l	mRNA	89.3333	69.25	1.11	1.09	1.09	2.1	2.09	1.59	1.8	2.14	0.343555
94041	Allc	mRNA	0.166667	1.25	0.1	0	0.11	0.05	0.05	0	0	0	0.822988
69694	Tatdn1	mRNA	422.83	299.038	16.65	14.06	13.81	17.71	20.74	18.12	19.25	23.35	0.0554275
75007	Mindy1	mRNA	606	685.5	19.95	16.56	16.11	25.25	29.61	24.14	20.82	21.19	0.982718
69540	Klk10	mRNA	27	60.5	5.74	2.62	3.5	1.45	1.01	0.59	1.97	2.45	0.383882
69957	Cdc16	mRNA	1101.67	1324.75	41.64	43.11	43.12	39.26	35.88	37.66	39.2	36.92	0.956849
237082	Nxt2	mRNA	669.333	852.5	28.55	24.36	21.35	21.41	21.44	21.52	19.39	17.76	0.73781
213011	Zfp583	mRNA	7.66667	10.25	0.03	0.39	0.31	0.25	0.25	0.39	0	0.2	0.971252
19069	Nup88	mRNA	1658.67	2073	68.95	59.65	56.52	54.77	53.91	49.34	47.84	53.01	0.780615
319508	Syt15	mRNA	9.68667	14.4775	0.06	0.47	0.57	0.06	0.2	0.37	0.06	0.1	0.900676
13430	Dnm2	mRNA	1410.61	1825.67	38.18	36.35	39.32	36.05	37.2	35.06	25.45	32.52	0.639212
13179	Dcn	mRNA	525.667	1747.25	39.56	122.83	107.23	4.34	19.85	59.78	12.06	4.27	0.516745
54526	Syt10	mRNA	0	0.25	0	0	0.01	0	0	0	0	0	0.961183
102580	Alg9	mRNA	185.5	182.5	3.24	4.88	5.16	5.21	4.84	5.04	4.47	5.08	0.73418
102639870	Gm38523	mRNA	0.166667	0.75	0.14	0	0.09	0.14	0	0	0	0	0.902571
329702	Dcst2	mRNA	3.16667	7	0.3	0.21	0.18	0.14	0.17	0.16	0.09	0.03	0.742607
67495	Tmem167b	mRNA	573.833	693.25	15.28	16.81	18.09	18.09	16.57	15.43	14.78	12.67	0.862982
216001	Micu1	mRNA	522.333	664.25	22.08	17.8	19.5	20.78	19.36	17.55	16.13	15.98	0.822896
17344	Pias2	mRNA	465.667	596.75	15.08	14.2	13.11	7.37	9.31	9.58	6.94	8.39	0.511715
52837	Tmx4	mRNA	511.5	798.25	10.85	11.55	11.91	8.62	7	7.83	7.37	5.75	0.0830411
74041	Ddias	mRNA	331.833	459.25	10.54	11.16	9.02	6.55	7.3	7.85	4.54	7.06	0.345815
76527	Il34	mRNA	225.167	273.5	12.58	13.84	10.84	8.28	8.53	9.87	12.54	8.03	0.950642
12144	Blm	mRNA	515.333	866.75	12.42	15.39	14.34	10.84	8.73	7.54	7.48	8.72	0.00875795
28081	Fam104a	mRNA	1263.62	981.125	27.47	22.6	21.64	34.18	33.5	34.36	35.66	40.53	0.134481
11304	Abca4	mRNA	4.83333	6.25	0.11	0.06	0.08	0.06	0.04	0.05	0.07	0.04	0.828964
12789	Cnga2	mRNA	0.333333	0.25	0	0	0.02	0	0	0	0	0.05	0.961183
100859931	Gm20604	mRNA	102.785	101.733	0.68	2.73	1.6	2.4	2.25	1.39	1.59	2.8	0.889534
547349	LOC547349	mRNA	78.0917	24.5025	0.63	0.94	0.78	3.79	1.55	4.84	10.67	6.37	0.0667705
67042	Ift27	mRNA	44.3333	54.75	3.33	5.55	5.37	2.45	4.47	4.5	2.88	3.6	0.994239
211389	Suox	mRNA	772.667	1068.25	29.12	34.32	33.9	32.3	23.93	24.2	26.93	23.1	0.322956
66085	Eif3f	mRNA	7366.5	6499.75	373.32	278.75	259.71	354.84	432.74	337.23	486.32	385.91	0.259825
66070	Cwc15	mRNA	2005.83	2251	196.83	139.12	134.16	124.82	136.38	121.52	136.47	165.77	0.992335
17463	Psmd7	mRNA	2312.17	2822.75	139.46	126.52	126.98	123.38	118.94	102.37	114.86	113.6	0.890499
13717	Eln	mRNA	24.5	119.5	0.97	1.87	5.91	0.21	0.35	1.68	0	0.12	0.501792
381091	H2-Eb2	mRNA	2.5	1.25	0	0	0.21	0.05	0.06	0.11	0	0.13	0.852616
14853	Gspt2	mRNA	2.83333	4.25	0.03	0.12	0.29	0.06	0.19	0.06	0	0.08	0.960982
100504608	Eef1akmt3	mRNA	2.33333	1.25	0	0.48	0.12	0	0.56	0.38	0.12	0.23	0.813492
67656	4930548H24Rik	mRNA	0.833333	1.25	0.15	0.05	0.05	0	0	0.06	0	0	0.820798
54217	Rpl36	mRNA	7359.67	5666.5	1638.34	756.79	1100.48	1783.94	1682.65	1481.43	1714.51	2461.37	0.329937
216049	Zfp365	mRNA	140	340	6.75	5.57	5.25	4.64	2.51	2.29	1.51	2.83	0.000187897
103466	Nt5dc3	mRNA	712.817	1129.01	13.94	14.49	14.12	10.57	7.22	9.82	6.33	8.52	0.0111866
20194	S100a10	mRNA	12238.2	14253.5	2815.6	1694.83	1568.62	1246.93	1325.77	1388.89	2032.72	1601.97	0.961183
20912	Stxbp3	mRNA	700.667	786.75	16.33	27.43	27.59	21.89	23.36	24.74	22.66	16.42	0.981678
67105	Timm21	mRNA	145.333	143.5	6.92	8.78	9.25	7.16	7.73	9.83	6.97	9.34	0.746047
269614	Pank4	mRNA	637.333	661.5	21.55	15.85	16.54	19.35	23.22	17.45	17.59	23.23	0.636011
67996	Srsf6	mRNA	4855	5075	105.22	100.01	95.93	98.85	91.4	102.59	94.56	110.58	0.856327
73936	Ccdc175	mRNA	0.166667	0	0	0	0	0	0	0.02	0	0	0.961183
192157	Socs7	mRNA	389	546.25	4.52	5.4	5.99	5.04	3.9	4.06	2.57	4.37	0.143297
56361	Pus1	mRNA	652.167	545	22.53	20.02	22.56	31.28	36.56	27.84	31.27	40.06	0.126905
11810	Apobec1	mRNA	810.5	742.25	5.84	28.75	28.63	30.18	46.52	35.85	25.27	20.79	0.548535
15558	Htr2a	mRNA	0.5	3	0.02	0.14	0.07	0.05	0	0	0.05	0	0.583237
20935	Surf6	mRNA	405.167	536.5	16.29	13.97	14.65	14.33	11.9	11.85	11.17	13.32	0.611282
73333	Slc25a31	mRNA	0.833333	0.75	0	0.03	0	0.07	0	0.15	0	0	0.961183
327956	Vmo1	mRNA	0	0.25	0	0	0.12	0	0	0	0	0	0.961183
212898	Dse	mRNA	101.333	170.25	0.66	3.69	6.77	2.19	4.06	3.2	1.2	1.15	0.82413
170767	Rfxap	mRNA	364	390.75	17.33	11.3	11.48	11.6	11.11	12.35	12.33	14.34	0.961183
80981	Arl4d	mRNA	529.667	370	14.32	12.05	16	36.52	41.23	20.07	45.01	25.73	0.229321
233812	Mosmo	mRNA	362.833	457.75	6.87	8.52	8.42	7.94	6.67	7.91	5.68	7.8	0.196848
93700	Pcdhgb2	mRNA	18.235	25.3625	0.62	0.13	0.34	0.43	0.8	0.19	0.45	0	0.999573
20555	Slfn1	mRNA	189.167	229	1.82	8.07	12.24	13.49	15.58	10.66	4.28	7.43	0.953218
17827	Mtx1	mRNA	1030.17	968.5	53.83	42.88	39.65	50.01	56.08	49.29	51.73	59.74	0.41506
57890	Il17re	mRNA	5.5	6.5	0.2	0.08	0.05	0.31	0.47	0.08	0.05	0.09	0.976599
20463	Cox7a2l	mRNA	3407	2795.25	241.81	167.01	158.53	220.83	218.7	225.35	322.13	262.86	0.302675
627569	Vmn2r12	mRNA	0.5	0.5	0	0.06	0.06	0	0	0	0	0.06	0.961183
101055806	Gm10378	mRNA	0.666667	0.5	0	0	0	0.1	0.15	0	0	0.05	0.961183
107515	Lgr4	mRNA	188.833	293	4.01	4.22	4.38	3.43	2.54	2.92	2.22	2.58	0.029493
17751	Mt3	mRNA	80.8333	52.75	5.56	5.32	5.45	17.79	21.9	6.68	6.64	24.5	0.458474
258266	Olfr247	mRNA	0.166667	0	0	0	0	0	0	0	0	0
11776	Ap3d1	mRNA	1265.17	1335.75	16.97	18.92	21.32	21.12	25.29	21.51	15.76	19.02	0.669832
16678	Krt1	mRNA	0.166667	0	0	0	0	0	0	0	0	0
11695	Alx4	mRNA	2	2	0	0.01	0.01	0.08	0.01	0.1	0	0.03	0.961183
107995	Cdc20	mRNA	1406.5	1679.75	73.45	66.63	61.93	70.97	70.46	53.16	57.62	68.9	0.964395
22718	Zfp60	mRNA	209.833	196.25	1.17	4.42	4.74	3.84	4.12	4.28	3.2	3.5	0.885154
80909	Castor2	mRNA	55	113	0.98	1.89	2.51	1.21	1.03	1.16	0.37	0.73	0.16825
574437	Xlr3b	mRNA	235.95	211.74	9.7	10.28	8.51	9.45	9.17	11.92	9.89	9.8	0.667698
433813	Pusl1	mRNA	298.1	276.1	13.02	16.32	17.12	16.6	16.81	18.71	12.82	23.63	0.468431
217715	Eif2b2	mRNA	634.667	792.5	46.42	35.1	33.17	29.83	35.94	30.41	31.23	32.06	0.961183
71927	Itfg1	mRNA	1021.17	1225.5	30.75	26.35	24.65	20.68	18.64	26.32	20.3	20.95	0.800074
54199	Ccrl2	mRNA	129.667	94.5	6.19	1.84	2.87	3.91	14.81	3.38	4.61	3.99	0.380134
66290	Atp6v1g1	mRNA	1462.5	1123	79.19	70.88	65.31	96.95	106.77	100.37	110.79	98.68	0.114157
240261	Ccdc112	mRNA	161.667	177.75	2.26	5.57	5.84	4.44	5.09	4.19	3.79	3.41	0.992335
56546	Sec1	mRNA	9.16833	12.6675	0.24	0.5	0.21	0.75	0.34	0.49	0.25	0.2	0.936253
22144	Tuba3a	mRNA	0.166667	0.5	0	0	0.05	0.05	0	0.05	0	0	0.961183
28042	Selenoi	mRNA	1789.33	2331.75	19.55	26.92	27.25	21.11	13.88	21.45	17.5	18.28	0.379198
18000	2021-09-02	mRNA	5081	5466.5	101.98	125.78	129.76	118.33	116.25	126.22	112.83	109.4	0.852024
333605	Frmpd4	mRNA	0.333333	0	0	0	0	0	0	0.01	0	0	0.961183
271305	Phf21b	mRNA	118.833	139.75	2.23	3.73	3.12	2.13	1.91	2.57	1.55	3.28	0.950642
18812	Prl2c3	mRNA	13644.4	5912.46	202.51	303.71	433.76	1248.43	2430.08	874.47	2046.14	1074.06	0.178971
245195	Retnlg	mRNA	53	65.5	13.97	8.24	11.59	2.99	10.24	5.86	9.96	1.76	0.937987
108168959	LOC108168959	mRNA	0.833333	2	0.07	0.07	0.11	0.04	0.03	0.04	0.04	0	0.798455
664608	Rhox4g	mRNA	0	0.25	0	0	0.08	0	0	0	0	0	0.961183
170733	Klra17	mRNA	65.1667	64.5	0.19	10.05	4.03	2.23	2.39	10.33	8.91	1.06	0.830275
56454	Aldh18a1	mRNA	1503.5	1640	28.1	35.47	29.99	36.48	25.92	32.8	26.75	38.88	0.961183
108168108	LOC108168108	mRNA	0.333333	2	0.04	0.03	0.03	0.01	0	0	0	0	0.491511
98404	AI597479	mRNA	373	464.25	8.53	9.87	9.43	9.76	7.4	8.84	6.73	8.46	0.611282
20845	Star	mRNA	31.3333	51	1.14	0.9	0.86	0.65	0.57	0.51	0.16	0.79	0.439572
109075	Exosc4	mRNA	944.333	794.25	37.81	31.05	23.76	35.94	40.75	37.84	42.16	44.22	0.253409
69912	Nup43	mRNA	715.333	750.75	47.53	47.48	40.09	38.89	40.56	38.06	50.15	49.3	0.839158
76457	Ccdc134	mRNA	339.333	315.5	10.38	10.29	10.17	9.75	11.84	12.29	10	12.87	0.42574
57321	Terf2ip	mRNA	374.333	364	6.74	7.42	7.14	6.98	6.51	7.26	8.2	7.26	0.762047
12819	Col15a1	mRNA	379.167	367	2.09	7.13	8.32	2.94	9.9	7.66	3.08	2.01	0.939237
320162	Cep95	mRNA	232.5	191.75	3.24	6.05	5.63	5.45	5.73	7.5	4.58	6.31	0.414077
231986	Jazf1	mRNA	11.5	8	0.07	0.15	0.33	0.24	0.29	0.6	0.23	0.19	0.625554
225870	Rin1	mRNA	617.667	719.75	9.2	12.73	11.53	14.89	10.21	12.16	8.4	13.6	0.961183
22169	Cmpk2	mRNA	50.5	47.75	0.22	0.69	0.87	2.39	2.9	1.5	1.18	0.53	0.739928
630579	Zfp808	mRNA	199.842	163.5	2.46	5.11	3.73	4.19	4.14	5.67	2.57	5.7	0.594559
76332	Cog2	mRNA	505.833	617.75	18.46	14.56	14.7	13.94	15.49	13.64	15.52	12.57	0.992335
53356	Eif3g	mRNA	3055.67	3046.75	274.64	181.22	179.57	234.81	242.63	200.9	269.72	244.93	0.70828
12062	Bdkrb2	mRNA	246.833	146.5	1.71	2.07	1.7	5.86	9.74	3.59	5.87	4.59	0.0943126
74254	Gpn1	mRNA	641.333	670	28.28	23.44	23.34	25.98	29.47	23.79	24.83	28.56	0.792209
19285	Cavin1	mRNA	3397	3074.5	53.36	62.03	65.6	87.23	64.76	85.93	78.09	75.36	0.458712
11554	Adrb1	mRNA	5.83333	15.25	0	0.87	0.66	0.22	0	0.58	0.12	0	0.809279
74114	Crot	mRNA	598.333	712.25	15.63	20.07	18.06	16.82	13.22	17.75	14.57	14.93	0.781831
75770	Brsk2	mRNA	0	1.25	0.02	0.02	0	0.05	0	0	0	0	0.799391
21350	Tal2	mRNA	0.666667	1.5	0.13	0	0.27	0	0	0.21	0	0.06	0.961183
67755	Ddx47	mRNA	1671.17	1757	79.23	70.83	66.93	72.12	68.1	67.11	79.81	80.55	0.820234
68219	Nudt21	mRNA	2360.17	2266.75	180.31	153.99	142.34	143.72	132.32	151.17	186.7	162.42	0.859291
12970	Crygs	mRNA	0.333333	0.25	0	0	0.12	0	0	0.12	0	0	0.992335
240755	4933406M09Rik	mRNA	0.166667	0.5	0.03	0.03	0	0	0	0	0	0	0.950642
66711	Sbds	mRNA	779.833	675.25	34.71	31.19	32.04	34.74	50.52	41.78	39.16	38.75	0.0799667
664994	Isoc2a	mRNA	192	183	8.24	14.66	12.96	15.4	13.4	16.3	13.79	14.04	0.58206
19334	Rab22a	mRNA	1128	1180.25	53.85	39.56	39.28	45.58	43.89	42.46	47.07	43.04	0.94734
381353	Ajm1	mRNA	39.6667	40.5	0.38	0.45	0.46	1.09	0.73	0.81	0.64	0.63	0.804808
64340	Dhx38	mRNA	983.833	1500.25	32.36	23.13	22.59	19.61	18.53	16.95	15.54	16.58	0.2348
76415	Fam187b	mRNA	1.33333	1.75	0	0.05	0.2	0.1	0.05	0.11	0	0.1	0.961183
12448	Ccne2	mRNA	515.54	698.115	11.54	22.81	23.32	14.64	14.48	13.82	8.11	14.03	0.349015
73472	Spata18	mRNA	0	0.25	0	0	0	0.04	0	0	0	0	0.961183
338350	Acad12	mRNA	12.9917	13.3125	0.12	0.46	0.61	0.39	0.64	0.33	0.27	0.41	0.961183
60507	Qtrt1	mRNA	484.667	423.5	24.95	21.86	19.34	24.81	27.53	26.7	29.1	30.25	0.235403
68046	2700062C07Rik	mRNA	566.5	611	66	36.96	39.18	39.52	43.61	35.57	51.51	54.6	0.940962
71966	Nkiras2	mRNA	399.065	511.5	19.48	19.05	17.06	15.7	14.21	16.35	11.78	16.18	0.593578
110606	Fntb	mRNA	273.667	292.25	8.5	8.7	7.86	7.48	7.04	9.51	5.55	8.41	0.992745
628416	Gm6878	lncRNA	0	0.25	0	0	0.01	0	0	0	0	0	0.961183
60345	Nrip2	mRNA	4	5.25	0.21	0.31	0.15	0.15	0.18	0.25	0.04	0.04	0.881174
19344	Rab5b	mRNA	840.167	1062.5	16.32	28.45	27.96	21.01	18.42	26.12	17.81	15.05	0.803365
16429	Itln1	mRNA	2.16667	3.75	0.07	0.53	0.4	0	0	0.07	0	0.43	0.942557
84505	Setdb1	mRNA	1788.33	1886.5	22.07	30.23	29	31.82	31.26	31.7	21.37	29.74	0.813243
66056	Zfp524	mRNA	195	110.5	4.64	8	6.95	9.97	13.7	16.12	15.48	14.67	0.000971844
12508	Cd53	mRNA	942.667	869.75	8.8	27.29	30.48	21.34	40.63	35.18	24.43	16.46	0.468913
212943	Tent5a	mRNA	279.667	382	1.95	5.29	8.55	3.63	4.16	4.66	3.12	3.24	0.866087
109815	Selenos	mRNA	1289.67	1163.25	87.34	69.38	62.18	75.27	76.85	81.61	106.96	73.49	0.557903
258710	Olfr419	mRNA	0	0.25	0	0.07	0	0	0	0	0	0	0.961183
75775	4930402K13Rik	mRNA	0.5	0.5	0	0	0	0.08	0.04	0	0	0.04	0.994239
14869	Gstp2	mRNA	301.913	246.077	22.71	15.32	18.09	48.96	48.14	28.19	33.09	39.92	0.434188
102634581	LOC102634581	mRNA	2.65833	3.515	0.15	0.32	0.27	0.27	0	0.16	0.26	0.44	0.994639
65221	Slc15a3	mRNA	319.833	293.5	5.65	8.18	9.09	12.67	24	13.07	6.38	5.83	0.564547
20702	Serpina1c	mRNA	2.53	2.0525	0	0.24	0.19	0	0.22	0.49	0	0	0.947261
77799	Sla2	mRNA	22.5733	24.3875	0.37	0.53	0.63	0.67	0.59	0.66	0.38	0.52	0.999616
12572	Cdk7	mRNA	742.143	779.98	5.92	8.34	7.55	6.39	6.08	7.15	6.53	7.22	0.961183
432879	Kbtbd6	mRNA	77.4267	109.18	1.92	3.06	3.4	1.96	1.23	2.16	1.54	1.65	0.331569
16500	Kcnb1	mRNA	32.5	58.5	0.27	0.43	0.49	0.33	0.22	0.21	0.12	0.23	0.129356
66338	Cdrt4	mRNA	0.333333	0	0	0	0	0	0	0	0	0
108167576	Gm46066	mRNA	13.8383	19.755	1.35	0.4	0.75	0.94	0.51	0.62	0.72	0.64	0.852024
18119	Nodal	mRNA	1	1	0	0.1	0.03	0	0	0.11	0.07	0	0.961183
66208	Nenf	mRNA	564	403.75	49.73	39.37	46.09	68.56	72.07	73.01	83.25	76.09	0.0700688
102641086	LOC102641086	mRNA	0.0833333	0	0	0	0	0	0.28	0	0	0
19732	Rgl2	mRNA	346.333	337	8.09	7.04	8.96	8.28	11.15	10.32	4.42	9.15	0.824456
277360	Prex1	mRNA	297.167	359.25	0.97	4.82	6.83	2.59	6.29	4.57	1.65	1.9	0.992335
18073	Nid1	mRNA	5810.01	6965.73	47.98	77.5	93.19	98.58	82.61	72.97	63.68	69.5	0.978002
54138	Atxn10	mRNA	2134.17	3117.25	105.38	102.63	100.27	58.26	67.16	65.95	73.74	54.31	0.427838
213760	Prepl	mRNA	362.918	465.683	8.38	9.27	9.35	7.07	8.11	7.16	5.72	7.56	0.452786
217379	Ubxn2a	mRNA	1194.33	1901.25	42.26	29.63	28.62	19.63	16.6	17.06	16.68	17.84	0.175752
69815	Krtcap3	mRNA	6	1.75	0.09	0.18	0.18	0.17	1.17	0.28	0.36	0.08	0.480337
677156	Cyp4f37	mRNA	0.681667	1.3475	0.03	0.06	0.03	0.03	0	0	0.03	0.08	0.9833
73737	1110008P14Rik	mRNA	520.333	467	76.71	54.53	49.38	56.21	76.61	62.37	50.95	75.13	0.67227
66072	Sdhaf2	mRNA	601.833	556.5	10.49	13.12	12.78	14.11	14.97	14.61	13.71	15.53	0.166741
57320	Park7	mRNA	892	898.5	72.06	74.81	71.19	93.11	80.14	79.75	73.48	108.32	0.582171
216021	Stox1	mRNA	1.83333	0.5	0	0	0.02	0.02	0.06	0.04	0	0.07	0.703486
229323	Gpr171	mRNA	68.8333	38.75	0.32	1.83	1.23	1.6	3.51	4.12	1.62	1.81	0.135074
105247234	Gm42368	other	3164.3	3688.32	138.98	61.94	61.45	45.76	51.84	91.55	42.33	81.55	0.940962
110935	Atp6v1b1	mRNA	6	0	0	0	0	0	0.4	0.08	0.04	0	0.387996
15937	Ier3	mRNA	1845.17	1464.5	158.04	94.62	90.39	66.86	195.64	119.21	158.85	72.92	0.516929
16012	Igfbp6	mRNA	458.667	300	8.2	6.18	11.83	42.55	31.97	21.04	42.22	28.24	0.335682
70420	Arpin	mRNA	785.833	861.25	27.71	26.49	24.77	33.7	28.66	30.55	28.17	29.27	0.761429
14999	H2-DMb1	mRNA	526.217	352.075	9.34	15.18	20.81	36.23	63.31	27.44	24.92	25.43	0.223382
68693	Hnrnpul2	mRNA	2647.5	3175	52.02	51.48	55.85	48.53	39.24	39.65	34.48	38.49	0.812081
13853	Epm2a	mRNA	2.33333	1.75	0.07	0.07	0.21	0.14	0	0.91	0	0	0.940082
22064	Trpc2	mRNA	15.6667	16.5	0.65	0.28	0	0.45	0.36	0.09	0.19	0.59	0.983968
19941	Rpl26	mRNA	29899.5	20617.5	3670.84	3065.59	2777.13	3779.31	4339.45	3860.49	6435.95	5374.48	0.0860747
102633986	Gm31679	lncRNA	20.8533	20.9225	0.31	0.32	0.62	0.53	0.21	0.25	0.55	0.49	0.968021
67768	N6amt1	mRNA	196.5	262.5	15.16	9.47	9.38	9.47	6.61	9.04	6.53	10.94	0.693247
54711	Plagl2	mRNA	445.333	663.25	7.74	8.25	8.34	9.52	7.46	7.12	4.04	5.88	0.204076
241694	Ralgapa2	mRNA	489.167	726	4.02	6.44	6.13	4.18	3.18	4.72	2.87	3.51	0.193537
237887	Slfn10-ps	mRNA	13.6833	20.1525	0.1	0.54	0.51	0.46	0.41	0.68	0.23	0.19	0.996448
22709	Zfp51	mRNA	372.667	353.752	10.64	11.02	8.11	9.23	13.26	10.73	10.67	9.62	0.5198
66705	Dnase1l2	mRNA	7.5	9.25	0.3	0.37	0.51	0.54	0.23	0.29	0.19	0.29	0.866243
22045	Trhr	mRNA	0.166667	0	0	0	0	0	0	0	0.02	0	0.961183
619331	Zfp551	mRNA	2.66667	3.75	0.03	0.06	0.12	0.12	0.04	0.07	0.06	0.06	0.989596
21375	Tbr1	mRNA	1.5	2.75	0.09	0.04	0.05	0.02	0.02	0.02	0.05	0	0.853545
77767	Ermn	mRNA	1	0.25	0	0.02	0	0	0.04	0.06	0	0	0.857615
18949	Pnn	mRNA	2943.5	3309.5	59.49	71.06	66.72	69.76	57.34	63.27	62.85	72.74	0.95659
16514	Kcnj11	mRNA	3	15.75	0.61	0.05	0.46	0.44	0	0	0	0.02	0.00745747
20499	Slc12a7	mRNA	631.833	822.25	8.94	11.45	12.87	11.13	9.51	10.37	8.34	8.97	0.603718
17156	Man1a2	mRNA	687.667	1048.5	7.89	10.87	11.18	6.34	4.43	7.44	4.77	5.51	0.0950498
27050	Rps3	mRNA	25393.7	21185.5	921.75	727.63	686.16	917.55	985.76	851.84	1337.94	1024.87	0.276956
319415	Hs3st5	mRNA	0	0.5	0.02	0	0.02	0	0	0	0	0	0.950642
194237	Rimkla	mRNA	0.333333	0.75	0	0	0.03	0.02	0.02	0	0	0	0.961183
216292	Mettl25	mRNA	88.5	116.75	4.7	4.46	4.62	3.01	1.78	3.92	1.89	2.56	0.303754
20467	Sin3b	mRNA	1708.33	2130.5	214.24	131.92	117.98	101.04	138.48	106.31	126.48	101.42	0.9447
57431	Dnajc4	mRNA	254.167	212.5	20.52	14.37	12.77	23.6	26.76	17.85	24.44	27.96	0.327139
269470	Wdr3	mRNA	955.833	1421.75	28.12	32.05	33.06	23.17	17.8	21.52	18.2	19.75	0.0429468
170483	Grin3b	mRNA	8.83333	10.5	0.28	0.55	0.2	0.2	0.13	0.32	0.1	0.32	0.922508
107701	Sf3b4	mRNA	1804.83	1910	88.54	73.36	66.7	89.77	82.79	87.1	74.55	86.34	0.786945
107272	Psat1	mRNA	6339.33	7093.25	231.46	256.46	223	223.99	156.79	210.65	203.86	246.98	0.940962
433693	Akirin2	mRNA	935.333	688.75	29.49	27.58	28.29	33.49	43.77	38.98	43.71	42.7	0.0242596
11859	Phox2a	mRNA	0.166667	0	0	0	0	0	0	0	0	0
223752	Gramd4	mRNA	386.167	441.25	5.63	7.85	7.62	9.38	8.05	8.38	4.58	7.7	0.980952
228812	Pigu	mRNA	951.833	865.25	30.2	38.58	41.77	45.85	45.84	45.61	48.21	44.72	0.24222
56277	Tmem45a	mRNA	30.1667	44.5	0.46	2.15	2.92	0.19	1.49	1.88	0.85	0.05	0.942557
84544	Cd96	mRNA	15.1667	12.75	0.13	0.42	0.46	0.73	1.52	0.57	0.58	0.33	0.627477
69627	Fam89a	mRNA	93.3333	66.75	1.58	5.64	4.58	3.38	5.37	6.11	3.49	5.77	0.45526
64295	Tmub1	mRNA	183.5	164.25	10.57	5.79	7.53	11.09	12.93	9.73	10.25	9.84	0.557903
18004	Nek1	mRNA	474.5	607.25	6.6	9.75	8.64	6.71	6.38	8.41	4.07	6.26	0.458474
24013	Grk1	mRNA	39.375	40.5625	0.26	0.45	0.39	0.4	0.57	0.32	0.27	0.22	0.989913
66197	Cks2	mRNA	2451	2467.25	370.52	276	260.69	263.23	275.35	264.17	338.9	327.36	0.854657
56214	Scamp4	mRNA	885.333	771.5	29.27	26.48	26.22	41.8	35.26	41.4	34.19	41.35	0.300249
215999	Mcu	mRNA	421	432.25	7.53	11.07	9.88	13.88	13.27	9.82	10.14	12.87	0.67926
242891	Cct8l1	mRNA	0.166667	0	0	0	0	0	0	0	0	0
56620	Clec4n	mRNA	297.833	261.5	6.66	11.03	20.32	26.16	22.44	38.7	14.03	18.12	0.458712
58202	Nelfb	mRNA	1396.5	1505.25	44.47	37.56	36.48	42.47	39.96	40.58	42.19	39.18	0.867889
93721	Cpn1	mRNA	1.66667	1.75	0	0.04	0.12	0.12	0.2	0.04	0.04	0.08	0.961183
72958	Zfp493	mRNA	47.6667	41.5	0.09	1.17	0.84	1.45	1.12	0.92	0.66	1.37	0.920568
30935	Tor3a	mRNA	530.667	457.5	5.14	8.44	9.24	16.31	17.53	14.09	15.75	9.15	0.300249
98193	Dcaf8	mRNA	716.333	1092.5	22.61	18.74	20.66	17.13	16.08	14.59	13.44	11.3	0.162623
234069	Pcid2	mRNA	1041	1364	33.82	31.84	29.08	23.93	18.96	23.48	18.1	20.78	0.51269
67912	1600012H06Rik	mRNA	724.995	606.947	9.64	16.84	17.59	20.53	16.04	22.61	20.36	15.89	0.570751
20759	Sprr2e	mRNA	0.833333	0	0	0	0	0	0.12	0	0	0	0.961183
18636	Cfp	mRNA	481.167	506.25	7.96	23.27	42.91	16.68	32.01	40.27	12.15	15.22	0.920724
58250	Chst11	mRNA	273.833	239.25	1.62	3.26	3.13	3.87	3.67	5.08	1.76	3.17	0.776189
432613	Trim80	mRNA	0	1.5	0	0.11	0.11	0	0	0	0	0	0.788391
13120	Cyp4b1	mRNA	15	35.5	0.5	1.53	3.2	0.3	0.22	2.08	0.12	0.34	0.705395
380684	Nefh	mRNA	1.5	1	0.02	0.02	0.02	0.02	0.08	0.02	0	0	0.961183
238266	Syt16	mRNA	0	0.25	0.03	0	0	0	0	0	0	0	0.961183
70789	Kynu	mRNA	6.66667	5	0.02	0.25	0.33	0.04	0.41	0.24	0.19	0.22	0.791601
21346	Tagln2	mRNA	9950.83	9016.25	393.82	471.15	470.42	597.35	625.08	605.57	608.87	617.66	0.0712967
73792	4930401G09Rik	lncRNA	1	1.25	0	0.1	0.38	0	0	0.35	0	0	0.992335
71619	Arl14	mRNA	0.166667	0	0	0	0	0	0	0	0	0
15450	Lipc	mRNA	2.83333	1.75	0.04	0.04	0.04	0.16	0.2	0.18	0	0.08	0.922508
381628	Adgrf3	mRNA	1	1.75	0.06	0	0.04	0.04	0	0	0	0.07	0.961183
271457	Rab5a	mRNA	2228.86	2275	86.98	63.27	61.46	62.28	72	66.72	77.84	64.25	0.876914
73728	Psd	mRNA	133.167	139.5	5.35	4.41	4.13	5.09	3.46	4.6	4.11	5.5	0.985509
68904	Abhd13	mRNA	723	846.75	12.05	11.62	11.46	10.77	9.31	9.88	9.74	10.13	0.768211
230824	Grhl3	mRNA	0.333333	0.25	0	0.03	0	0	0	0	0.03	0	0.992335
15478	Hs3st3a1	mRNA	0.353333	0.25	0	0.02	0	0	0	0.02	0	0.02	0.961183
226970	Arhgef4	mRNA	62.8333	97	3.47	2.28	1.95	2.4	1.71	1.85	1.29	2.17	0.512087
209824	Vmn1r183	mRNA	0	0.75	0.17	0.09	0	0	0	0	0	0	0.896097
76295	Atp11b	mRNA	1312.17	1716.5	18.42	28.43	27.12	24.1	17.3	21.54	16.87	18.28	0.233449
625068	Vmn2r84	mRNA	0	0.5	0	0.06	0	0	0	0	0	0	0.950642
19261	Sirpa	mRNA	1527.5	1599.25	8.7	35.08	44.23	31.43	70.34	41.53	20.32	19.65	0.855638
21781	Tfdp1	mRNA	3213	3646	86.78	105.13	104.93	108.17	95.63	98.8	66.38	100.29	0.870281
107271	Yars	mRNA	1546	1619	39.6	39.24	34.18	47.31	40.12	34.43	41.95	48.46	0.84165
51885	Tubgcp4	mRNA	649.797	723.77	10.57	13.85	12.55	10.42	10.4	11.87	8.61	11.91	0.961183
22431	Wt1	mRNA	33.3333	24	0.16	0.79	0.92	0.33	0.33	1.52	0.09	0.77	0.929095
330671	B4galnt4	mRNA	154.167	135.75	2.54	3.43	2.4	3.9	2.82	4.54	2.84	4.45	0.569658
14421	B4galnt1	mRNA	200.667	285.75	2.8	11.33	16.59	5.29	10.33	8.95	2.98	4.56	0.866657
269902	Vmn2r57	mRNA	0.5	0.75	0	0.06	0.03	0	0.05	0	0	0	0.970393
17178	Fxyd3	mRNA	30.6667	5.75	0.85	0.34	0.86	1.81	15.82	2.55	3.78	0.98	0.062828
320080	Zbtb39	mRNA	201.667	281.75	4.69	2.7	2.92	2.71	3.06	2.51	2.5	2.27	0.753173
71687	Tmem25	mRNA	1.5	3	0.06	0.09	0.09	0.12	0.15	0	0.03	0.03	0.912274
20480	Clpb	mRNA	1068.5	1146	21.39	14.97	14.29	19.81	23.09	14.71	16.47	20.65	0.835149
73467	1700066M21Rik	mRNA	386.2	471	11.18	11.84	10.83	10.99	9.42	9.65	7.22	10.37	0.509985
56488	Nxt1	mRNA	1088.83	969.75	86.16	76.33	69.74	76.16	79.63	75.34	100.4	97.83	0.491511
72355	Cdpf1	mRNA	232.833	180.25	11.56	13.5	13.03	16.75	16.08	17.66	15.3	22.59	0.193548
22057	Tob1	mRNA	392.333	416	13	11.5	12.95	14.38	13.72	12.84	13.6	10.61	0.950642
102640527	Gm36566	pseudo	0.666667	1.5	0.03	0.03	0.03	0.09	0	0.07	0	0	0.856177
19181	Psmc2	mRNA	1960.17	2265.75	110.82	94.58	86.69	77.03	92.86	81.96	83.51	89.45	0.992335
636931	Trim71	mRNA	1.66667	3	0.04	0.03	0.05	0.04	0.03	0.01	0.05	0.01	0.954008
382406	Poc1b	mRNA	402.333	577	13.89	18.17	16.4	11.49	8.98	13.66	7.88	11.14	0.19761
192662	Arhgdia	mRNA	11022.7	11516.8	335.68	417.11	387.87	412.78	364.19	468.53	328.29	452.96	0.741876
78309	Cul9	mRNA	18.3333	41.5	0.22	0.42	0.57	0.24	0.4	0.21	0.03	0.12	0.561545
105734	Tigd5	mRNA	79	80.75	0.76	1.22	1.02	1.65	1.19	1.24	0.89	1.36	0.954008
73902	Psmb11	mRNA	0.166667	0	0	0	0	0	0	0	0	0
20220	Sap18	mRNA	181.197	214.757	2.97	4.67	6.62	3.18	2.77	4.11	2.77	4.9	0.930108
27276	Plekhb1	mRNA	9.66667	12.75	0.32	0.17	0.77	0.8	0.47	0.61	0.13	0.12	0.838487
26563	Ror1	mRNA	4.5	19.75	0.18	0.33	0.43	0.03	0.06	0.14	0.07	0.02	0.338179
192212	Prom2	mRNA	10.8333	0	0	0	0	0	0.35	0.26	0.05	0	0.0649811
207911	Mchr1	mRNA	2.83333	4.5	0.23	0.33	0.03	0	0.25	0.14	0.07	0.03	0.961453
245347	Gm4984	mRNA	0.833333	0.75	0	0.08	0.08	0.08	0	0	0.08	0	0.950642
78052	Tmem190	mRNA	3.16667	2.25	0.09	0.21	0.15	0.2	0.07	0.22	0.14	0.39	0.93683
21881	Tkt	mRNA	3883.17	4549.5	106.3	100.3	95.9	93.21	92.88	91.13	89.66	90.44	0.970293
14369	Fzd7	mRNA	460.667	429.75	3.96	5.88	5.65	9.2	8.49	7.48	6.54	6.14	0.578139
319197	Gpr4	mRNA	10.3333	8.75	0.13	0.33	0.29	0.35	0.24	0.42	0	0.28	0.996448
59012	Moxd1	mRNA	7.5	4.75	0.02	0.12	0.25	0.04	0.64	0.17	0.02	0.15	0.62466
211770	Trib1	mRNA	846.5	1245.5	22.29	22.34	26.31	15.36	9.76	17.82	15.85	9.55	0.222679
108167571	Gm43263	mRNA	8.38167	10.0675	1.38	1.01	0.19	0.54	0.81	1.02	0.4	0.68	0.994233
81879	Tfcp2l1	mRNA	5.33333	1	0.01	0	0	0.02	0.1	0.04	0.02	0.01	0.413848
14941	Gzmd	mRNA	91.6667	28.25	2.4	0.42	0.17	6.25	11.87	1.43	4.42	14.87	0.259019
100862368	Gm21680	mRNA	17.72	9.555	0.14	0.26	0.02	0	0	0.25	0.1	0.01	0.991561
108105	B3gnt5	mRNA	12.3333	10.75	0.16	0.17	0.15	0.15	0.17	0.37	0.16	0.15	0.80183
330485	Tmem145	mRNA	0.333333	0.25	0	0	0.03	0	0	0	0	0.03	0.992335
19108	Prkx	mRNA	463.167	516.75	6.78	9.87	9.98	8.56	9.57	9.29	6.75	6.56	0.992335
243822	Fam71e2	mRNA	0.166667	0	0	0	0	0	0.03	0	0	0	0.961183
12890	Cplx2	mRNA	9.45167	9.955	0.1	0.13	0.23	0.18	0.19	0.58	0.03	0.11	0.947357
433702	Ncbp1	mRNA	1679.33	2071	57.03	52.98	47.97	43.94	43.39	42.13	43.34	43.72	0.660301
26549	Itgb1bp2	mRNA	8.5	40.25	0.46	0.29	3.44	5.02	0	0.37	0	0.34	0.0504849
29807	Tpk1	mRNA	34	29.75	0.49	0.94	1.15	0.61	1.28	1.37	0.74	0.56	0.737494
52120	Hgsnat	mRNA	424.167	539.5	12.58	15.61	16.87	12.02	11.59	13.89	10.03	10.47	0.526979
207259	Zbtb7c	mRNA	21.5	29.25	0.2	0.45	0.38	0.8	0.41	0.3	0.4	0.46	0.961183
232670	Tspan33	mRNA	13.6667	19	0.11	0.91	1.31	0.42	0.87	0.58	0.33	0.56	0.966932
13858	Eps15	mRNA	2267.33	2561.25	28.32	36.39	37.24	37.28	34.12	38.07	33.3	33.32	0.983088
66809	Krt20	mRNA	13.1667	18.75	1.66	0.41	0.3	0.4	1.29	0.64	0.49	0.32	0.999042
17130	Smad6	mRNA	10.3333	6.25	0	0.13	0.26	0.23	0.34	0.54	0.08	0.07	0.800799
66493	Mrpl51	mRNA	1451	1104.25	42.86	55.12	48.76	67.3	66.74	72.85	69.97	81.76	0.0529204
12737	Cldn1	mRNA	1.83333	2.5	0.02	0.09	0.07	0.04	0.1	0	0.02	0	0.950642
20296	Ccl2	mRNA	565.833	438	35.21	33.02	42.87	61.85	108.85	45.23	63.8	46.43	0.215574
30933	Tor2a	mRNA	3198.49	3006.74	183.49	116.61	118.91	154.75	137.16	141.15	173.88	200.02	0.651387
320502	Lmod3	mRNA	6.16667	25	0.44	0.23	1.03	1.57	0	0	0	0.36	0.174948
674895	Nek10	mRNA	2.16667	11.25	0.18	0.07	0.19	0.02	0.04	0.05	0.01	0	0.220441
71591	Zfp251	mRNA	305.667	523.5	8.13	13.34	11.36	8.93	4.64	8.03	3.61	6.25	0.0323556
244867	Arhgap20	mRNA	1.5	2.25	0.02	0.02	0.05	0	0	0.06	0	0.01	0.961183
26462	Txnrd2	mRNA	202.5	183	6.35	7.58	6.8	7.4	8.54	7.94	7.36	8.81	0.285285
15416	Hoxb8	mRNA	61.5	55.75	1.05	1.82	1.97	1.93	1.67	2.58	1.41	2.02	0.724351
18643	Pfn1	mRNA	12285.7	10305.2	794.29	953.4	903.69	1078.28	1075.5	1320.72	1034.68	1287.52	0.0388976
67272	Cmtm5	mRNA	0.166667	0.25	0	0	0	0.09	0	0.09	0	0	0.992335
72157	Pgm2	mRNA	284.833	436.75	9.45	16.29	18.89	8.94	8.65	13.3	5.37	6.33	0.306026
22746	Zfp85	mRNA	53.4883	51.9925	1.67	1.87	1.53	1.64	1.81	1.74	2.42	1.9	0.642835
628705	Phf11c	mRNA	31.0917	22.27	0.35	0.8	0.67	2.26	1.72	1.93	1.08	1.59	0.617108
12518	Cd79a	mRNA	10.8333	11.25	0.34	0.51	1.3	0.38	0.38	0.54	0.17	0.65	0.895069
69736	Nup37	mRNA	744.333	873	53.32	52.06	49.56	50.26	45.52	43.98	46.21	44.9	0.91787
14827	Pdia3	mRNA	12011.3	11739.8	275.26	315.06	320.16	346.85	352.89	347.14	377.93	310.15	0.384616
26413	Mapk1	mRNA	2955.83	3504.5	80.37	88.14	84.61	68.78	68.32	72.85	76.96	62.31	0.792209
71713	Cdc40	mRNA	616.333	841.75	19.31	18.88	17.79	14.17	13.92	14.43	13.16	11.56	0.364678
21953	Tnni2	mRNA	142.5	542.75	80.74	4.17	58.16	67.03	1.79	2.94	0.88	6.79	0.00654577
230082	Nol6	mRNA	1265.17	1860	34.25	25.7	27.23	27.87	22.61	20.83	19.08	21.91	0.249871
73671	Sult6b1	mRNA	1.66667	5.5	0.25	0.11	0.11	0.41	0	0.04	0.04	0.1	0.435442
72504	Taf4b	mRNA	435.333	740.25	17.94	10.47	10.99	6.93	6.66	7.04	6.17	7.56	0.191373
76645	Pkd1l2	mRNA	1.66667	5	0.06	0.04	0.04	0.05	0.03	0.03	0	0.01	0.571423
75612	Gns	mRNA	2627.83	3132.75	38.46	61.65	70.39	56.4	77.67	57.68	41.27	41.36	0.961183
57741	Noc2l	mRNA	2768.94	3091.57	94.66	70.2	69.93	84.44	86.24	71.95	75.14	89.94	0.860183
12638	Cftr	mRNA	0.166667	0.5	0.01	0	0.01	0	0.01	0	0	0	0.961183
72318	Cyth4	mRNA	344.333	491.25	2.54	18.49	19.64	9.28	12.8	15.38	4.24	6.74	0.922508
26913	Gprin1	mRNA	0	0.5	0	0.02	0	0.02	0	0	0	0	0.950642
21754	Tesk1	mRNA	646.323	749.165	15.82	13.57	13.28	15.11	13.06	14.72	8.44	17.62	0.977508
245857	Ssh3	mRNA	394.5	346.75	6.26	9.66	9.73	10.95	14.15	12.4	8.59	10.18	0.223666
208164	Fam180a	mRNA	0.333333	0	0	0	0	0	0.05	0	0	0	0.961183
21912	Tspan7	mRNA	58.5	61.75	2.16	2.58	3.39	2	2.69	4.41	1.22	1.55	0.992335
212933	Pm20d1	mRNA	0.5	2.25	0	0.15	0.08	0	0.03	0.04	0	0	0.870409
102058	Exoc8	mRNA	634.833	647	3.83	6.75	6.75	6.66	5.26	6.41	4.53	6.67	0.961183
272347	Zfp398	mRNA	86.8333	129.25	1.38	1.36	1.62	1.14	0.88	1.2	0.86	0.84	0.362416
105351	AW209491	mRNA	388	371	9.37	15.43	13.92	14.89	14.06	12.6	14.64	16.61	0.666714
16682	Krt4	mRNA	0.5	0.25	0	0	0	0.03	0	0	0.07	0	0.961183
67669	Hikeshi	mRNA	839.833	655.25	34.6	52.83	55.86	56.67	51.54	64.55	59.18	62.56	0.26943
22264	Prap1	mRNA	0	0.5	0.14	0	0.14	0	0	0	0	0	0.950642
319984	Jph4	mRNA	0.166667	0.25	0	0.02	0	0	0	0	0	0.01	0.992335
14632	Gli1	mRNA	108	105	2.29	1.78	1.48	2.43	2.6	1.81	0.98	3.05	0.950642
399510	Map4k5	mRNA	1122	1790	33.23	30.33	29.49	18.68	19.49	21.02	16.45	14.81	0.128711
654801	Zfp784	mRNA	44.1667	50.75	1.43	1.53	2.02	1.8	1.19	2.05	0.72	1.94	0.961183
66066	Gng11	mRNA	59.5	60.25	2.65	5.79	8.35	6.11	5.5	12.98	3.98	4.04	0.869758
332397	Nanos1	mRNA	149.667	159.25	2.35	3.04	3.06	2.85	1.77	3.44	2.65	2.72	0.992335
70601	Ecd	mRNA	977.667	1308	33.76	29.46	28.61	25.83	26.87	24.58	20.9	24.58	0.607174
108168034	Gm46382	mRNA	0.5	1	0	0.02	0	0.04	0.01	0	0	0.01	0.961183
110835	Chrna5	mRNA	0	0.25	0	0	0	0.03	0	0	0	0	0.961183
108682	Gpt2	mRNA	893.333	1124.75	19.62	21.69	20.86	24.71	14.8	16.21	14.44	21.64	0.474182
107197	Uqcc3	mRNA	248.833	179	17.45	12.82	13.91	23.96	29.99	21.3	29.12	27.48	0.103481
69724	Rnaseh2a	mRNA	1101.83	1258.5	72.8	53.59	52.24	51.84	48.71	51.66	55.91	60.44	0.983431
218294	Cdc14b	mRNA	137.66	157.595	1.42	2.5	2.09	2.18	1.9	2	1.25	1.71	0.843656
56527	Mast1	mRNA	82.3333	104.5	1.77	2.15	2.32	1.92	0.95	2.57	1.1	1.7	0.639793
72699	Lime1	mRNA	305.833	281.5	9.59	10.05	9.55	12.17	12.87	13.2	7.71	14.86	0.46683
242297	Fam110b	mRNA	9.5	11.5	0.07	0.33	0.44	0.42	0.17	0.35	0.15	0.28	0.934863
114229	Kiss1r	mRNA	8.83333	16	0.19	0.3	0.37	0.22	0.09	0.14	0.05	0.18	0.384059
19775	Xpr1	mRNA	716.5	1031.25	8.15	10.24	10	8.62	7.87	7.71	5.09	5.98	0.0830411
103841	Cuedc1	mRNA	108.333	103.25	1.47	1.46	2.23	3.98	4.12	2.73	1.57	2.63	0.767483
67091	Trappc6a	mRNA	146	124.25	8.38	13.22	12.1	18.32	18.64	16.6	14.26	14.63	0.442756
66087	Emc3	mRNA	2607.17	2485.25	99.24	83.07	81.16	101.81	101.31	94.25	105.59	90.03	0.667469
212980	Slc45a3	mRNA	8.66667	5.5	0.11	0.2	0.14	0.06	0.15	0.46	0.13	0	0.860106
74427	Eaf1	mRNA	1734.5	2561	49.07	43.58	41.02	34.43	29.4	30.63	26.03	24.65	0.062483
15258	Hipk2	mRNA	296.78	410.567	4.01	3.42	3.41	3.1	4.02	2.56	3.37	2.24	0.784552
75528	Tex29	mRNA	0.166667	0	0	0	0	0	0.1	0	0	0	0.961183
20525	Slc2a1	mRNA	3685.67	3792.25	113.26	106.29	106.77	91.99	94.51	110.42	115.08	88.83	0.950642
17952	Naip6	mRNA	18.1033	38.36	0.14	0.5	0.68	0.25	0.45	0.2	0.1	0.17	0.650076
218639	Arl15	mRNA	183	251.5	3.88	6.2	5.9	5	4.31	4.31	3.06	4.11	0.384242
66627	Ogfod2	mRNA	157.833	116.25	4.21	4.63	4.66	6.95	7.89	8.42	7.71	6.33	0.0874846
27414	Sergef	mRNA	125.333	133.5	7.65	5.67	5.8	7.51	7.13	6.86	7.5	7.44	0.762944
193043	Zfp3	mRNA	83.8333	84	1.98	3.55	3.37	4.43	4.42	3.04	2.82	3.96	0.854657
22262	Uox	mRNA	3.33333	3.5	0.2	0	0.12	0.23	0.11	0.21	0.12	0.15	0.961183
380728	Kcnh4	mRNA	0.333333	0.25	0	0.02	0	0	0	0	0	0	0.961183
71994	Cnn3	mRNA	1852.83	1930.5	71.16	65.79	61.89	78.14	80.69	73.52	66.73	62.54	0.799439
67087	Ctnnbip1	mRNA	168.167	190.75	3.85	4.79	5.63	5.95	6.64	6.09	2.73	4.01	0.989853
55944	Eif3d	mRNA	4618.5	4711.75	213.28	151.83	153.72	188.84	202.06	160.64	223.22	186.01	0.702413
68002	Sdhaf4	mRNA	118.667	130.25	15.93	16.45	16.11	16.37	12.49	16.61	11.43	17.83	0.961183
98417	Cnih4	mRNA	2154.5	2124	62.34	40.64	43.21	44.51	43.18	47.29	51.97	51.66	0.842601
17764	Mtf1	mRNA	332.697	401.755	3.19	3.83	3.96	3.47	3.46	3.59	2.29	2.99	0.719813
20544	Slc9a1	mRNA	502.833	626.25	8.53	10	11.03	14.35	16.86	11.03	6.81	11.86	0.992335
77055	Krt76	mRNA	11.5	1.5	0	0	0.03	0.15	1.34	0.1	0.16	0.39	0.102973
55934	Rp9	mRNA	495.833	473	42.38	27.36	24.74	30.85	26.66	28.44	37.75	36.43	0.908836
212326	Fam149a	mRNA	24.8333	24.25	0.1	0.47	0.63	0.21	0.39	0.85	0.13	0.24	0.883558
56094	Cts8	mRNA	0.493333	0	0	0	0	0	0	0	0	0
229588	Gm128	mRNA	0.333333	0.5	0.05	0	0	0.05	0.05	0.05	0	0	0.994233
105193	Nhlrc1	mRNA	6	10	0.15	0.47	0.25	0.37	0.12	0.3	0.13	0.3	0.880479
93730	Lztfl1	mRNA	428.833	471.25	11.14	8.92	8.62	7.65	10.11	9.62	9	7.95	0.911601
68842	Tulp4	mRNA	427.37	513.385	1.74	3.62	4.08	4.19	4.08	3.73	1.7	2.61	0.961183
67452	Pnpla8	mRNA	235.5	329.5	4.25	5.66	6.24	4.3	4.47	4.68	3.36	3.06	0.453743
68146	Arl13b	mRNA	317.667	426.5	7.26	9.58	9.3	7.25	7.16	7.77	5.59	5.89	0.439449
231863	Fbxl18	mRNA	325.167	357.75	8.73	9.2	9.06	8.84	10.48	8.44	8.13	8.43	0.886947
20286	Zc3h7b	mRNA	455.5	496	3.14	5.63	6.01	9.56	7.44	7.32	4.75	6.57	0.879546
229697	Cym	mRNA	0.166667	0	0	0	0	0	0.06	0	0	0	0.961183
23983	Pcbp1	mRNA	5369.83	4485.5	188	197.91	187.9	205.2	228.92	245.02	243.09	263.26	0.0413356
12501	Cd3e	mRNA	30	30.75	0.26	1.2	2.96	1.91	3.33	2.47	0.69	1.71	0.835146
12283	Cab39	mRNA	1891.83	2586	58.29	49.19	50.63	41.65	38.69	41.21	38.8	34.64	0.396614
102634499	LOC102634499	unknown	12.0317	8.74	0.49	0.73	0.42	0.84	0.87	1.38	0.37	1.23	0.671299
72345	Amer1	mRNA	171.5	206.5	0.43	2.13	2.17	1.96	1.24	1.75	0.85	1.29	0.866088
13884	Ces1c	mRNA	0.5	0	0	0	0	0	0	0.13	0	0	0.883558
68839	Ankrd46	mRNA	548	538.5	12.28	15.41	15.24	18.35	15.59	19.49	13.44	17.63	0.57469
28071	Twistnb	mRNA	428.5	429.5	16.08	13.15	13.27	10.24	11.54	13.33	12.84	13.94	0.961183
18033	Nfkb1	mRNA	2205.83	2963.5	53.14	56.61	52.36	41.68	39.37	46.23	36.18	36.94	0.234062
75705	Eif4b	mRNA	11319.5	11702	179.67	211.28	209.15	245.86	192.76	215.65	234.21	224.39	0.754089
403185	Cfap97d2	mRNA	0	0.25	0	0.01	0	0	0	0	0	0	0.961183
18521	Pcbp2	mRNA	9141.9	8880.36	433.02	325.11	331.49	345.73	399.3	388.54	427.66	412.98	0.591284
64380	Ms4a4c	mRNA	441.333	277.75	0.34	12.62	12.99	20.5	46.88	21.06	15.83	15.25	0.57522
227545	Proser2	mRNA	1.33333	1.75	0.02	0.06	0.02	0.04	0.04	0.04	0.02	0	0.961183
18221	Nudc	mRNA	3323.83	3109.75	179.64	156.03	158.53	191.55	196.46	175.47	189.23	211.76	0.415684
66190	Acer3	mRNA	702.667	587.5	6.99	9.45	10.78	13.09	16.24	10.9	11.75	12.91	0.219245
56489	Ikbke	mRNA	394.167	370.25	4.53	8.31	9.33	11.42	15.84	9.94	7.06	9.8	0.436715
24045	Scamp3	mRNA	1072.79	1041.85	42.09	48.98	45.17	57.37	54.31	60.54	46.63	50.01	0.414952
353242	Mrpl21	mRNA	574.167	556	45.82	43.08	40.32	53.92	51.9	39.38	54.34	53.87	0.669452
210582	Coq10a	mRNA	157.333	151	8.69	7.1	7.38	8.68	11.08	9.95	7.4	9.02	0.449332
209630	Frmd4a	mRNA	596.333	918.75	7.49	12.05	13.03	9.35	8.39	8.6	5.53	6.87	0.154992
16527	Kcnk3	mRNA	0.5	3.5	0	0.04	0.13	0.09	0.02	0	0.02	0	0.516913
12261	C1qbp	mRNA	7568	7167.75	568.72	434.14	410.22	445.61	484.91	443.47	582.93	593.16	0.571127
217057	Ptrh2	mRNA	508.333	418.5	7.32	11.1	9.9	11.49	8.46	12.18	10.92	13.91	0.526875
16432	Itm2b	mRNA	7418.83	7471.25	186.23	312.79	410.15	315.5	472.56	324.79	383	233.14	0.581496
51938	Ccdc39	mRNA	0.61	0.815	0.04	0	0.08	0	0	0.12	0	0	0.994233
19016	Pparg	mRNA	97.1667	101.5	0.49	7.51	4.87	2.98	4.75	7.72	4.38	2.63	0.84165
53871	Pkd2l2	mRNA	6.75833	5.28	0.2	0.07	0.17	0.16	0.17	0.15	0.18	0.2	0.950642
236511	Ago1	mRNA	490.333	821.5	6.04	9.92	9.82	5.97	4.38	6.38	3.5	4.8	0.0653981
57908	Zfp318	mRNA	449.5	681	4.4	7.52	7.47	4.21	3.2	3.89	2.34	2.87	0.0872431
22227	Ucp1	mRNA	0	1	0.04	0	0	0.13	0	0	0	0	0.852434
67122	Nrarp	mRNA	1033.33	672.5	10.05	16.01	16.67	30.83	21.15	32.53	24.32	38.49	0.16448
68350	Mul1	mRNA	280.167	278	5.07	4.91	4.66	6.03	7.68	5.37	4.96	5.61	0.518819
330627	Trim66	mRNA	19.6667	35.75	0.21	0.41	0.3	0.17	0.13	0.23	0.08	0.09	0.311767
93879	Pcdhb8	mRNA	0.666667	0.5	0.03	0	0.03	0	0	0.1	0.03	0	0.942557
237558	Myrfl	mRNA	0.5	1	0	0.02	0	0.07	0	0.02	0	0.04	0.977908
66768	Pacrgl	mRNA	196.667	173.75	8.42	9.15	8.47	9.61	9.65	9.01	11.34	11.86	0.445986
66404	Rtf2	mRNA	1394	1318	42.33	40.36	40.73	52.6	55.89	47.41	55.89	44.2	0.398926
319170	Hist1h2an	mRNA	6.28167	2.835	1.04	0	1.01	0.33	0.66	1.73	2.37	2.51	0.324679
102632483	Gm17330	mRNA	5.29333	9.155	0.03	0.43	0.37	0.13	0.35	0.16	0.05	0.1	0.920519
67053	Rpp14	mRNA	760.667	705	20.63	20.65	18.56	21.16	19.48	21.33	24.78	23.49	0.560855
59069	Tpm3	mRNA	8977.8	11859.5	465.03	406.31	375.48	370.34	333.61	388.69	309.9	338.04	0.428249
102636907	Gm4275	mRNA	0.833333	0.25	0	0	0	0.08	0.08	0	0	0	0.992335
17242	Mdk	mRNA	16.5	23	1.02	1.79	5.11	1.21	2.76	2.67	0.21	1.54	0.950642
80294	Pofut2	mRNA	709	610.25	14.7	20.2	20.6	23.43	25.87	26.99	18.63	26.33	0.125883
107182	Btaf1	mRNA	990.667	1400	15.18	15.92	14.59	11.26	10.48	12.66	9.19	11.65	0.12892
100039227	Duxbl2	mRNA	0.221667	0.125	0	0.02	0	0	0.03	0.01	0	0	0.961183
22648	Zfp11	mRNA	20.6667	21.25	0.35	0.36	0.43	0.37	0.45	0.54	0.18	0.5	0.929942
74978	Lrriq1	mRNA	0	0.25	0.03	0	0	0	0	0	0	0	0.961183
14732	Gpam	mRNA	25.8333	68.5	0.22	0.64	1.8	0.48	0.41	0.28	0.09	0.17	0.135955
268567	Tmem229b	mRNA	210.5	218.5	0.72	4.77	5.13	5.65	5.88	5.86	2.77	3.61	0.919622
109552	Sri	mRNA	1637.83	1553.5	45.85	47.73	39.72	50.6	51.7	59.48	45.29	48.95	0.352409
50916	Irx4	mRNA	0.5	0	0	0	0	0	0.06	0	0	0	0.942557
93717	Pcdhga9	mRNA	2.23167	2.9475	0	0.06	0.11	0	0	0.21	0	0	0.967476
67896	Ccdc80	mRNA	77.6667	249.75	1.6	5.05	12.52	0.98	2.62	3.94	0.57	0.41	0.51718
18971	Pold1	mRNA	971.167	1087.75	21.16	20.23	22.42	25.05	20.96	22.75	18.82	25.94	0.889392
57080	Gtf2ird1	mRNA	434	568.25	10.89	8.52	9.5	11.92	11.74	7.71	7.83	8.07	0.930565
213452	Dstyk	mRNA	149	259	2.52	3.03	3.14	2.78	1.88	1.88	1.4	1.59	0.00403854
20505	Slc34a1	mRNA	0	0.25	0	0	0	0.04	0	0	0	0	0.961183
14132	Fcgrt	mRNA	326	747.5	9	33.64	74.36	8.77	9.13	34.08	7.87	6.6	0.597233
17123	Madcam1	mRNA	0.833333	2.5	0.36	0.11	0	0.05	0.15	0.06	0	0	0.843656
211484	Tsga10	mRNA	17.8333	28.75	0.59	0.88	1.35	0.32	0.66	0.66	0.13	0.57	0.671175
106557	Ldhal6b	mRNA	2.33333	4.75	0.36	0.31	0.1	0.2	0.15	0.22	0.1	0.2	0.925162
233836	Slc5a11	mRNA	0.666667	0.75	0	0.04	0	0.08	0.08	0	0.04	0	0.992335
12753	Clock	mRNA	911.5	1260.5	8.42	10.2	10.21	7.73	7.48	7.14	5.71	7.11	0.107349
14547	Gdap2	mRNA	359.667	453.5	11.27	11.48	12.87	8.39	10.47	9.98	7.45	9.32	0.784552
70348	Ube2cbp	mRNA	83.5	90.5	4.35	3.75	3.72	2.57	2.76	4.51	3.54	3.88	0.946732
18218	Dusp8	mRNA	118.333	79.75	0.72	0.93	0.99	2.13	2.38	1.34	1.8	2.32	0.224247
52392	D1Ertd622e	mRNA	990	952.25	24.76	23.83	23.89	25.55	24.18	27.14	29.46	25.22	0.655969
140703	Emid1	mRNA	3.16667	1.5	0	0.08	0	0.14	0.14	0.05	0	0.19	0.961183
381110	Rmdn2	mRNA	82.8333	87.25	2.71	2.12	2.47	3.01	2.97	2.94	2	2.93	0.91763
71746	Rgl3	mRNA	8.16667	9	0.05	0.42	0.36	0.11	0.56	0.18	0.06	0.05	0.96876
21985	Tpd52	mRNA	2364	2488.75	77.69	81.12	74.62	78.9	82.14	91.35	72.67	73.93	0.652499
80290	Gpr146	mRNA	114.333	198.25	1.62	4.01	5.86	2.06	2.37	2.95	1.46	1.71	0.491159
675812	Zfp605	mRNA	27.3333	27.75	0.1	0.6	0.92	0.65	0.75	0.48	0.42	0.63	0.959133
225339	Ammecr1l	mRNA	329.667	420.75	4.07	6.84	7.36	5.92	5.89	6.03	3.39	4.45	0.715997
77110	Gpbp1l1	mRNA	922.833	1073.5	20.15	22.16	23.49	19.95	20.67	20.88	17.41	16.69	0.831011
110639	Prps2	mRNA	649	713	10.34	15.18	13.91	15.81	12.62	14.68	12.26	13.45	0.961183
71827	Lrrc34	mRNA	0.333333	1	0.08	0	0.08	0	0	0.04	0	0	0.923808
67052	Ndc80	mRNA	484.167	547.75	17.91	18.68	17.27	17.33	16.8	15.13	16.84	17.16	0.996228
14007	Celf2	mRNA	207.167	275	0.37	2.78	4.04	1.95	2.65	2.87	0.99	1.08	0.954488
338349	Cntln	mRNA	247.167	396.5	4.88	8.29	6.93	4.11	3.94	5.65	3.56	4.21	0.189602
54486	Hpgds	mRNA	82.8333	149.25	0.47	4.28	6.57	1.64	2.26	3.91	1.69	0.83	0.806255
668661	2410002F23Rik	mRNA	1472.67	1514.48	61.87	41.99	40.38	51.67	50.34	51.26	55.91	57.63	0.749399
102635744	Gm28729	mRNA	2.83333	5.5	0.14	0.27	0.22	0.09	0.14	0	0.03	0.27	0.94734
71562	Afmid	mRNA	226.333	267.75	9.19	7.33	6.39	9.99	7.07	7.81	6.84	8.3	0.961183
226971	Plekhb2	mRNA	1137.17	1444.5	26.23	32.95	32.89	30.1	26.38	32.32	21.46	19.87	0.569658
667742	Piezo2	mRNA	13.3333	13.5	0.01	0.12	0.19	0.03	0.06	0.24	0.05	0.01	0.988017
20276	Scnn1a	mRNA	28.5	36.75	0.57	1.01	0.9	1.26	1.09	0.76	0.38	0.76	0.902736
74486	Osbpl10	mRNA	6.66667	4.5	0.22	0.03	0.09	0.3	0.37	0.13	0.13	0.12	0.899849
381157	Greb1l	mRNA	122.5	152.75	0.68	1.27	1.17	1.85	1.17	0.9	0.86	1.21	0.92678
235633	Als2cl	mRNA	1622.83	1595.75	23.03	17	18.16	30.36	28.99	21.43	22.62	30.74	0.557903
56485	Slc2a5	mRNA	88.5	57.5	0.71	1.28	1.04	2.99	1.9	2.63	2.93	2.45	0.346762
13047	Cux1	mRNA	563.167	732	7.76	11.98	12.06	11.57	10.94	10.2	7.08	8.6	0.759727
70873	Cnbd2	mRNA	785.967	910.038	59.64	28.98	30.47	23.69	31.97	39.23	37.12	33.16	0.992335
20955	Vamp7	mRNA	189.333	230.5	6.58	6.81	7.39	4.69	6.69	5.68	4.64	5.02	0.897587
16541	Napsa	mRNA	73.6667	57.25	2.03	3.19	3.63	2.58	7.17	4.13	2.2	3.28	0.379403
625249	Gpx4	mRNA	6876	4423.75	331.66	274.58	262.15	555.24	564.33	485.68	618.76	587.2	0.0860183
193670	Rnf185	mRNA	389.667	446.5	12	10.17	10.08	9.11	10.9	10.39	8.5	8.21	0.961183
14260	Fmn1	mRNA	26.8333	34.25	0.11	0.24	0.44	0.15	0.34	0.24	0.06	0.09	0.961183
66049	Rogdi	mRNA	182	187.25	8.95	10.06	10.92	10.05	10.44	12.39	6.78	12.22	0.806782
100862324	LOC100862324	mRNA	0	2.1425	0	0	0.13	0	0	0	0	0	0.730147
80720	Pbx4	mRNA	2.16667	1	0.26	0	0.09	0	0.25	0.28	0.09	0.17	0.832139
72440	Rhno1	mRNA	1456.67	1398.5	53.55	50.59	47.11	65.38	56.26	63.02	57.86	74.95	0.573221
68274	Toporsl	mRNA	0.666667	0.75	0	0	0.03	0.06	0.03	0.03	0	0.06	0.961183
18516	Pbx3	mRNA	281.5	268.75	5.26	8.78	6.62	7.21	8	8.64	5.95	8.83	0.567438
214254	Nudt15	mRNA	239.333	335.5	5.51	9.59	8.71	5.14	3.03	6.16	3.87	5.48	0.319454
93762	Smarca5	mRNA	2830.83	4444.74	72.95	74.62	71.36	47.23	44.29	43.54	41.3	42.46	0.0703127
27055	Fkbp9	mRNA	822.5	1142.25	19.38	28.28	35.71	23.62	20.2	23.99	16.46	20	0.377074
52202	Rbm34	mRNA	568.167	757.75	30.53	18.65	18.44	16.96	18.11	14.12	20.92	17.02	0.740502
16636	Klra5	mRNA	2.16667	1.5	0	0.15	0.07	0.19	0.07	0.31	0.07	0.07	0.961183
381549	Zfp69	mRNA	65	74.25	3.63	2.23	2.6	2.15	3.22	2.41	1.58	3.13	0.961183
66098	Chchd6	mRNA	86.1667	96.25	7.28	5.38	6.45	7	9.32	4.68	4.81	7.67	0.961183
71838	Phf7	mRNA	220	317	15.65	11.41	10.66	8.62	6.34	8.88	7.08	9.32	0.388333
11826	Aqp1	mRNA	174.5	246	2.6	7.44	13.06	2.28	2.92	14.35	1.71	1.49	0.961183
12234	Btrc	mRNA	234.5	284.75	4.41	4.3	3.75	4.11	4.18	4.33	3.01	3.69	0.942166
19724	Rfx1	mRNA	549.167	535	6.22	8.84	8.43	12.08	10.1	10.59	8.46	11.06	0.533981
13067	Cyct	mRNA	0	0.75	0	0.39	0	0	0	0	0	0	0.907084
224419	Map3k7cl	mRNA	0.833333	2.75	0.17	0.04	0.13	0.17	0	0	0	0	0.341931
66231	Thoc7	mRNA	770.667	752.75	76.95	55.8	54.52	55.27	64.72	56.94	66.51	74.18	0.753309
330192	Vps37b	mRNA	1092.67	866	27.29	19.09	17.56	33.56	43.35	29.7	36.2	38.34	0.123201
319636	Fsd1l	mRNA	132.167	189.75	1.42	2.29	1.84	1.68	1.1	1.42	1.31	1.33	0.28929
13823	Epb41l3	mRNA	82.3333	51.5	0.25	1.12	1.3	0.98	4.1	2.95	0.75	0.45	0.290357
268857	Nlrc3	mRNA	33.3467	52.25	0.29	0.4	0.88	0.52	0.4	0.63	0.16	0.33	0.566793
11994	Pcdh15	mRNA	1	1.75	0	0.02	0.02	0.01	0	0	0	0.01	0.846154
211914	Asap2	mRNA	327.002	580.525	10.58	7.07	7.55	3.95	4.03	5.31	3.87	2.98	0.15028
19218	Ptger3	mRNA	1.33333	3.25	0	0.04	0.3	0.1	0	0.12	0	0.03	0.794423
73744	Man2c1	mRNA	800.667	911	20.62	14.98	14.84	21.13	20.41	18.3	14.34	21.68	0.924097
320394	Cenpt	mRNA	625.833	864.25	39.7	35.79	33.66	31.05	23.94	34.17	20.61	30.18	0.4821
12057	Opn1sw	mRNA	1.5	1.25	0.06	0	0.06	0.03	0	0.06	0	0.03	0.961183
12229	Btk	mRNA	70.1667	92.25	0.31	3.55	4.69	1.84	2.84	3.17	1.32	1.65	0.966932
26914	H2afy	mRNA	1953.67	2299.25	93.95	69.77	69.42	85.79	84.35	74.15	70.07	79.52	0.966182
11717	Ampd3	mRNA	89.3333	228.732	4.03	4.93	8.72	2.36	4.14	2.35	0.56	1.45	0.164417
72144	Slc37a3	mRNA	406.667	447	6.44	7.93	8.56	7.18	7.71	8.65	6.74	7.06	0.84165
75646	Rai14	mRNA	3742.17	3339	34.96	38.65	37.21	78.88	78.02	47.43	71.44	48.79	0.456397
108012	Ap1s2	mRNA	716.167	863	13.97	24.37	28.12	17.5	16.63	22.91	14.37	15.66	0.595451
210009	Mtrr	mRNA	206.667	261.25	3.85	6.01	5.75	5.33	4.19	4.13	4.01	4.7	0.746375
142980	Tlr3	mRNA	89.5	120.75	0.53	2.32	2.42	2.52	1.62	1.88	1.76	1.2	0.961183
69774	Ms4a6b	mRNA	292	393.75	1.98	19.66	33.17	13.56	27	19.18	7.19	10	0.999418
70315	Hdac8	mRNA	39.1667	40.25	1.39	1.39	2.04	1.46	1.71	2.06	1.3	1.49	0.929095
13838	Epha4	mRNA	3.33333	5.5	0.02	0.05	0.18	0	0.04	0.11	0	0.01	0.951077
14182	Fgfr1	mRNA	118.5	317	2.3	6.06	10.84	0.89	3.45	2.55	1.04	0.49	0.268468
234094	Arhgef10	mRNA	39	73	0.12	1.64	2.55	0.42	0.24	2.02	0.19	0.65	0.859291
107829	Thoc5	mRNA	1035.5	1166	40.69	34.38	34.1	39.58	40.82	33.59	37.79	36.09	0.906397
64929	Scel	mRNA	10.8333	19	0.49	0.44	0.61	0.2	0.39	0.3	0.14	0.07	0.568149
66826	Taz	mRNA	429.833	380.75	7.96	16.25	14.4	20.71	18.67	18.01	19.5	18.22	0.396303
19731	Rgl1	mRNA	492.167	476.75	4.76	9.15	10.27	8.3	13.12	13.7	5.87	6.33	0.617109
67344	Tctex1d1	mRNA	0.166667	0	0	0	0	0	0.08	0	0	0	0.961183
434727	Fthl17c	mRNA	2.785	2.5625	0.5	0	0.18	0.28	0.69	0	0.23	0.24	0.961183
100294583	Alkal2	mRNA	0	0.25	0	0	0.05	0	0	0	0	0	0.961183
332131	Krt78	mRNA	0.666667	0.25	0	0	0	0.02	0.04	0.02	0	0	0.950642
382639	Zbtb42	mRNA	97.8333	99.75	1.57	2.08	1.72	2.82	2.79	1.96	1.36	2.32	0.961183
71302	Arhgap26	mRNA	42.8333	67.25	0.28	0.76	1.04	0.38	0.49	0.7	0.12	0.39	0.730127
234814	Mthfsd	mRNA	334.5	316	7.84	13.61	12.2	18.33	17.56	13.16	12.37	15.69	0.569658
278304	Zfp385c	mRNA	0.268333	1.25	0.05	0	0	0.08	0	0	0	0	0.809366
16886	Limk2	mRNA	294.5	384	8.29	6.77	6.12	7.87	8.45	7.22	5.01	6.23	0.791601
329942	Csmd2	mRNA	0.166667	0	0	0	0	0	0	0	0	0
67216	Mboat2	mRNA	4	2.25	0.05	0.08	0.03	0.01	0.17	0.03	0	0	0.961183
216441	Slc26a10	mRNA	8.5	7.5	0.19	0.09	0.26	0.26	0.19	0.24	0.12	0.11	0.961183
67501	Ccdc50	mRNA	1100.33	1447.5	12.2	17.58	16.06	11.05	11.28	13.06	9.79	10.53	0.472263
18213	Ntrk3	mRNA	2.83333	1.5	0	0	0.05	0.06	0.01	0.14	0.09	0.02	0.673492
625281	Gm6570	mRNA	0.666667	0.25	0	0	0.26	0	0	0.28	0	0.25	0.961183
244886	Tmem266	mRNA	2	3.5	0.18	0.16	0.11	0.04	0.06	0.04	0.08	0.07	0.816171
237782	Smcr8	mRNA	801.167	997.5	7.08	11.18	10.92	8.31	9.7	7.62	7.24	6.97	0.813028
14585	Gfra1	mRNA	336.5	327	2.69	4.59	4.78	7.96	6.38	7.21	6.68	4.09	0.625299
21343	Taf6	mRNA	587.9	573.312	13.66	18.18	17.11	21.76	20.15	22.02	16	21.19	0.429779
319150	Hist1h3b	mRNA	7.34167	9.7275	2.46	1.11	0.93	3.27	1.44	1.92	1.26	2.44	0.982718
434689	Gm10220	mRNA	30.1967	22.3975	0.96	1.04	0.12	0	0.02	1.23	0.3	0	0.961183
230751	Oscp1	mRNA	40	80.5	3.97	1.95	1.96	1.15	1.85	1.11	1.14	0.91	0.306835
210172	Zfp526	mRNA	102.667	204	3.23	4.44	4.84	3.18	2.17	2.9	1.33	1.7	0.0220237
70616	Sugp1	mRNA	416.833	479.75	16.9	15.05	14.84	14.88	17.16	13.57	13.77	15.47	0.961183
11472	Actn2	mRNA	63.6667	474.5	24.86	2.21	10.13	18.07	0.51	0.49	0.36	2.18	0.000919995
20500	Slc13a2	mRNA	0.333333	0.25	0	0.04	0	0	0	0.05	0	0	0.992335
12561	Cdh4	mRNA	0.166667	0.25	0	0	0	0.01	0	0	0	0	0.961183
328035	Fads6	mRNA	5.66667	4.25	0.02	0.08	0.06	0.03	0.12	0.12	0	0.03	0.961183
625360	BC147527	mRNA	41.6667	36.75	0.05	2.37	2.56	1.03	2.74	3.55	1.44	1.21	0.771903
12986	Csf3r	mRNA	327.377	333	2.52	9.01	13.32	6.81	18.8	14.06	5.34	5.85	0.799163
106861	Abhd3	mRNA	58.5	59.25	1.75	1.81	2.3	3.27	2.66	1.98	1.97	2.07	0.983708
320135	BC049715	mRNA	1	1	0	0.03	0.03	0.13	0.06	0.1	0.03	0	0.961183
109267	Ssc4d	mRNA	34.5	38.5	0.54	1.08	0.89	1.47	0.73	0.95	0.77	0.98	0.961183
14205	Vegfd	mRNA	16	59	0.81	3.59	4.83	0.5	0.75	1.96	0.04	0.51	0.337734
67260	Cers4	mRNA	11.3433	18.25	0.25	0.28	0.72	0.15	0.17	0.35	0.1	0.15	0.677989
239188	Enox1	mRNA	4	7.5	0.04	0.21	0.19	0.08	0.12	0.13	0.02	0.06	0.809366
380840	Lyrm4	mRNA	414.167	400.5	20.78	17.9	16.14	22.78	23.45	16.21	18.54	26.8	0.730127
110115	Cyp11b1	mRNA	0.166667	0	0	0	0	0	0	0	0	0
52323	Klhl7	mRNA	477.333	498.75	11.93	9.79	8.99	9.64	10.36	9.7	11.22	8.82	0.940962
67851	1700021F05Rik	mRNA	506.333	377.5	18.93	31.82	31.5	39.14	40.67	40.64	41.34	45.53	0.109371
319481	Wdr59	mRNA	336.167	409	5.3	5.69	5.6	6.01	5.67	5.05	5.17	4.81	0.992416
100862085	Gm16867	mRNA	7.11	2.7825	0.05	0.19	0.04	0.22	0.43	0.3	0	0.36	0.374599
105501	Abhd4	mRNA	400.667	510.25	13.41	16.3	18.05	12.71	15.08	17.02	10.36	8.5	0.828964
100042175	Gm10230	mRNA	2.83667	1.5975	0.56	0	0	0	1.02	0	0	0	0.961183
18976	Pomc	mRNA	0.5	0.75	0.08	0	0.15	0	0.07	0.08	0	0	0.961183
14388	Gab1	mRNA	2048.67	2724.25	41.87	47.14	48.78	46.09	38.57	37.79	33.55	36.88	0.146546
76899	Golga1	mRNA	377	439.5	4.21	7.95	7.28	5.25	5.7	6.83	3.86	6.2	0.961183
382562	Pfn4	mRNA	45.6667	62.5	4.47	4.02	2.54	2.4	1.57	1.98	2.24	2.82	0.331719
544717	1190007I07Rik	mRNA	136.333	95.25	6.42	10.1	10.37	20.9	11.52	17.49	17.62	25.98	0.343724
269016	Sh3rf2	mRNA	2.16667	7.25	0.16	0.03	0.12	0.12	0.14	0	0	0	0.471225
14088	Fancc	mRNA	202.167	171.75	3.37	4.09	3.89	4.28	5.86	4.26	5.19	6.12	0.152054
385668	Lca5l	mRNA	0.5	2.75	0.05	0.05	0.11	0.05	0	0.05	0	0.02	0.664139
75099	Lysmd4	mRNA	89.1667	108	2.79	2.3	2.36	2.54	2.82	2.07	2.46	1.82	0.971307
21906	Otop1	mRNA	0.166667	0	0	0	0	0	0	0	0.02	0	0.961183
54598	Calcrl	mRNA	46.5	47.5	0.35	0.8	1.24	0.4	0.88	1.5	0.33	0.37	0.950642
84113	Ptov1	mRNA	665.167	652.75	23.2	22.62	25.92	21.81	26.45	32.69	20.93	23.78	0.379836
242608	Podn	mRNA	20.1667	157	0.53	4.37	9.09	0.11	0.46	1.2	0.16	0.2	0.15885
78232	Trappc6b	mRNA	1149.83	921	49.83	52.38	51.72	63.11	67.39	74.9	74.73	71.57	0.0389383
54645	Gripap1	mRNA	211.5	255.5	3.66	6.91	6.3	6.19	6.44	6.5	3.38	4.9	0.961183
75296	Fgfr1op	mRNA	632.805	682.5	19.43	12.18	13.7	16.07	16.71	13.08	16.43	15.06	0.951101
56863	Cldn9	mRNA	4.5	15.5	0.51	0.62	0.16	1.85	0.25	0.17	0	0.69	0.553249
76820	Fam49a	mRNA	261.333	288	2.33	6.02	5.33	3.03	5.62	6.02	3.68	2.53	0.886189
71970	Zbed5	mRNA	136.628	139.262	5.55	3.6	3.56	3.69	3.57	3.54	6	4.17	0.908328
68891	Cd177	mRNA	12.5	28.75	1.04	0.9	0.7	0.38	0.6	0.37	0.34	0.16	0.266343
235300	Tmem136	mRNA	2.16667	2.5	0.02	0.08	0.1	0	0.06	0.02	0.08	0.06	0.961183
13586	Ear1	mRNA	0	0.245	0	0	0	0.11	0	0	0	0
18741	Pitx2	mRNA	1	4	0.09	0.03	0.2	0.37	0	0	0	0.05	0.271175
67717	Lipf	mRNA	0	0.5	0	0	0.11	0	0	0	0	0	0.950642
72023	Cyb561d1	mRNA	95	139.5	2.11	1.88	2.41	2.5	1.87	1.89	1.32	1.53	0.414306
68278	Ddx39	mRNA	2229.5	2323.25	96	106.5	97.8	107.08	85.24	100.12	99.31	119.74	0.873629
268491	Meioc	mRNA	0.666667	3.25	0.05	0.02	0.09	0.06	0.04	0.02	0	0	0.573221
242425	Gabbr2	mRNA	26.3333	42.75	0.83	0.53	0.53	1.07	0.81	0.38	0.56	0.54	0.866088
53886	Cdkl2	mRNA	304.5	368.25	4.77	8.28	6.99	5.93	3.38	6.4	3.91	4.77	0.466474
380768	Ccdc177	mRNA	0.5	0.5	0	0	0	0.03	0	0	0	0	0.950642
66959	Dusp26	mRNA	1.16667	4.5	0.42	0	0.04	0.23	0.08	0.04	0	0	0.516128
77766	Elp4	mRNA	145.833	217.725	2.5	2.57	2.17	1.64	1.57	1.7	1.15	1.72	0.287652
77031	Slc9a8	mRNA	567.167	825.75	14.29	10.39	10.97	12.94	9.62	10.24	7.07	10.92	0.43132
99100	Cep152	mRNA	230	351.75	6.67	4.31	4.27	3.19	4.29	3.25	2.58	3.74	0.526875
13039	Ctsl	mRNA	8234.01	8733.25	436.04	443.04	374.34	295.19	370.33	436.73	410.02	299.7	0.951545
331374	Dgkk	mRNA	0.5	0.75	0.01	0.01	0.01	0	0.01	0.02	0	0	0.994239
16004	Igf2r	mRNA	81.8333	130.5	0.59	0.85	1.72	0.85	1.3	0.79	0.36	0.32	0.728041
68176	Inka1	mRNA	41.8333	47.25	3.88	2.12	3.13	4.43	4.8	3.41	3.02	3.14	0.938459
17879	Myh1	mRNA	62.6517	1439.01	22.3	1	23.26	19.04	0.01	0	0	0.29	0.00144296
23873	Faim	mRNA	422.833	452	49.13	27.38	28.49	31.2	34.77	32.47	31.63	35.3	0.961183
13346	Des	mRNA	573.333	2899.25	94.3	6.88	55.41	107.38	0.64	0.62	0.12	8.03	0.0126997
67619	Nob1	mRNA	1413	1406.25	77.17	55.88	52.05	63.86	67.81	61.81	72.44	69.86	0.690816
22218	Sumo1	mRNA	2286.33	2275.25	166.13	140.35	136.7	120.37	132.62	146.89	154.51	138.96	0.85042
239037	Lrit1	mRNA	0.166667	0	0	0	0	0	0	0	0	0
105247109	Gm42267	pseudo	839.84	915.25	104.67	51.65	46.1	47.16	47.34	68.59	38.35	81.68	0.99091
17906	Myl2	mRNA	1.5	4	0.66	0.14	0.54	0.78	0	0.14	0	0.64	0.762047
14127	Fcer1g	mRNA	1852	1320.75	58.97	213.85	246.18	151.92	448.93	394.49	153.72	197.52	0.163719
12418	Cbx4	mRNA	905.833	876.5	9.99	8.56	8.55	19.28	15.53	11.69	12.07	16.46	0.607299
258121	Olfr1465	mRNA	0.166667	0	0	0	0	0	0	0	0	0
65972	Ifi30	mRNA	1924.83	1719.5	72.07	132.3	183.74	154.15	234.53	159.33	126.23	144.64	0.451991
105244717	Gm40275	mRNA	36.3333	31.5	1.2	1.05	2.26	0.92	0.71	1.85	0.97	1.62	0.992335
12519	Cd80	mRNA	29.6667	21.75	0.66	0.44	0.59	1.25	1.5	1.47	0.48	1.15	0.558127
70240	Ufsp1	mRNA	118.833	122.5	9.89	8.34	6.73	12.86	7.63	6.84	12.38	11.55	0.94734
94282	Sfxn5	mRNA	79.3333	98.75	0.79	1.93	2.44	2.25	1.79	1.67	0.87	1.91	0.950642
211986	Tmem18	mRNA	1186.17	1514.75	41.39	39.06	34.82	29.12	27.55	32.45	35.98	24.06	0.843656
142682	Zcchc14	mRNA	501.5	700.25	6.67	8.49	8.38	6.68	5.27	6.5	4.08	6.24	0.192474
320528	Vps13c	mRNA	320.5	637.25	3.6	6.27	6.36	3.08	2.84	3.49	1.99	2.27	0.0387372
73533	1700080G18Rik	mRNA	6.45333	12.53	1.27	0.54	0.44	0.05	0.29	0.27	0.33	0.29	0.709961
110175	Ggct	mRNA	139.167	163.5	10.56	11.42	9.72	9.97	7.15	8.24	7.33	12.04	0.854657
78354	2210407C18Rik	mRNA	1.66667	0.25	0.09	0	0	0	0.86	0	0	0	0.767071
78321	Ankrd23	mRNA	201.833	549	20.37	5.88	24.29	17.26	3.26	4.03	2.16	5.24	7.32171e-05
72123	Ccdc71l	mRNA	224.833	208	1.66	4.06	4.55	3.67	4.94	5.31	2.53	3.2	0.739325
268420	Alkbh5	mRNA	2119	2765.75	28.37	36.13	37.04	25.19	20.61	27.43	21.26	23.02	0.205891
12516	Cd7	mRNA	12	14.75	0.07	1.27	2.08	0.93	0.64	0.95	0.45	0.93	0.913809
232854	Zfp418	mRNA	3.16667	3.5	0	0.16	0.13	0.08	0.2	0.11	0.03	0.08	0.961183
66645	Pspc1	mRNA	603.333	785.5	23.08	25.98	23.7	22.23	24.36	19.15	18.51	21.46	0.636962
105245236	LOC105245236	mRNA	11.5	10	0.91	1.99	1.58	0.76	1.51	1.12	1.33	2.65	0.826571
268882	Fbxo45	mRNA	395.5	536.5	10.14	10.34	9.94	6.56	5.44	7.44	5.76	6.52	0.208363
16427	Itih4	mRNA	0.833333	3	0.07	0.02	0.16	0.02	0	0.07	0	0	0.713132
328440	Npm2	mRNA	2.88667	3.645	0.11	0.31	0.11	0.08	0.22	0.13	0.24	0.07	0.961183
12626	Cetn3	mRNA	1704.5	1893.75	154.06	148.56	141.73	105.8	112.89	126	143.65	130.05	0.996448
258938	Olfr1417	mRNA	0.5	0	0	0	0	0	0.08	0.18	0	0	0.886947
226090	Ermp1	mRNA	326.333	436.75	4.24	6.87	6.45	4.81	4.03	5.08	3.4	4.27	0.368277
66694	Uqcrfs1	mRNA	3243	3187.5	225.41	178.96	159.22	160.37	155	183.06	192.52	211.66	0.871709
208718	Dis3l2	mRNA	78.6667	126.25	3.75	2.4	3.13	2.02	2.66	2.25	1.38	1.81	0.559867
17146	Mageb2	mRNA	33.2933	37.5075	3.3	3.81	3.44	1.17	1.37	3.75	2.02	2.71	0.961183
243270	Hcar1	mRNA	1.5	1.25	0	0	0.09	0.02	0.06	0.09	0	0.02	0.950642
622976	Gm6377	mRNA	54.8333	54	1.13	2.13	1.17	1.04	1.83	2.26	1.58	0.68	0.822896
12176	Bnip3	mRNA	2337.33	2438.5	103.33	121.81	122.52	57.22	55.04	114.74	89.04	66.28	0.846727
105518	A630023A22Rik	mRNA	9	10.75	0.39	0.85	0.22	0.92	0.81	0.42	0.4	0.48	0.980206
71743	Coasy	mRNA	383.667	350	8.41	11.95	10.95	17.67	16.02	16.78	16.4	18.06	0.456833
20319	Sfrp2	mRNA	102.333	817.5	8.73	32.46	76.89	1.02	2.71	5.46	0.67	0.84	0.0479843
66096	Lamtor4	mRNA	377.333	268	23.81	23.43	18.14	30.56	35.61	35.55	36.35	34.31	0.0574051
14726	Pdpn	mRNA	846.333	714.75	22.68	30.91	31.2	27.85	34.51	42.6	35.27	22.23	0.36746
74434	Sohlh2	mRNA	0.5	0.5	0	0	0.03	0.03	0.03	0	0	0	0.961183
11778	Ap3s2	mRNA	480.167	543.75	6.24	6.07	6.52	6.98	6.33	6.39	5.53	5.74	0.992335
22420	Wnt6	mRNA	283.167	182.25	3.47	4.57	6.11	10.97	12.95	8.42	9.83	13.05	0.112577
225215	Rsl24d1	mRNA	1731.67	1968.25	109.57	91.3	88.54	90.63	68.92	82.17	99.23	83.03	0.957984
214944	Mob3b	mRNA	7.66667	8.5	0.06	0.16	0.32	0.06	0.11	0.21	0.02	0.06	0.982387
74637	Shpk	mRNA	32	50.5	1.13	1.17	1.68	1.62	1.56	0.93	0.71	0.51	0.517053
217682	Plekhd1	mRNA	0.333333	0.25	0	0	0	0.02	0.02	0.02	0	0	0.961183
13489	Drd2	mRNA	0	0.25	0.03	0	0	0	0	0	0	0	0.961183
20682	Sox9	mRNA	14.6667	7	0.03	0.07	0.27	0.1	0.73	0.22	0.1	0.03	0.569998
56221	Ccl24	mRNA	44.1667	32.5	1.1	1.04	2.18	4.76	1.14	6.17	3.63	1.15	0.834041
208994	Fam83b	mRNA	0.666667	0	0	0	0	0	0.03	0.02	0	0	0.889711
93893	Pcdhb22	mRNA	103.833	130.5	3.06	3.05	2.87	2.99	2.66	3.73	2.38	1.71	0.950642
226182	Taf5	mRNA	236.667	261	5.07	5.99	5.9	5.52	5.58	4.83	4.5	5.59	0.961183
76233	Dnttip1	mRNA	495.5	671	52.81	36.47	37.63	34.73	28.57	34.52	32.69	31.86	0.6616
619665	Klf14	mRNA	0	0.5	0	0	0.05	0	0	0	0	0	0.950642
110312	Pmch	mRNA	1.14	2.875	0	0	0.46	0.77	0	0	0.26	0.14	0.836542
30944	Zfp354c	mRNA	4	15.75	0.04	0.17	0.53	0.08	0.05	0.15	0.01	0.02	0.411262
13998	Fgd6	mRNA	339.833	461	6.57	5.64	5.11	4.65	6.71	5.76	5.08	5.08	0.188926
234404	Nxnl1	mRNA	5.5	5	0.05	0.15	0.15	0.15	0.17	0.25	0.13	0.07	0.935085
13680	Ddx19a	mRNA	1062.72	1535.41	49.77	42.18	44.65	30.31	29.59	33.88	27.44	27.48	0.281115
237029	4932411N23Rik	mRNA	0.166667	0	0	0	0	0	0	0	0	0
14829	Grpr	mRNA	1.33333	1.25	0.05	0	0	0.08	0.08	0	0.06	0.03	0.961183
278279	Tmtc2	mRNA	172.5	223.5	1.84	3.58	3.05	2.43	1.79	3.07	1.6	1.75	0.621292
59001	Pole3	mRNA	394.667	453.25	81.94	52.77	55.37	66.09	65.37	48.09	71.58	66.12	0.961183
12460	Ccs	mRNA	191	197.75	15.9	14	13.78	13.86	20.37	14.97	13.87	12.83	0.726816
68922	Dnaic1	mRNA	3	0.75	0	0.03	0.03	0.03	0.21	0.03	0	0.03	0.728477
68026	Pclaf	mRNA	1758	1569.5	34.11	55.01	49.97	48.29	46.35	50.63	45.71	60.33	0.533392
104625	Cnot6	mRNA	2045.83	2715.25	25.29	43.46	39.19	26.82	21.02	30.34	18.55	24.55	0.217578
81877	Tnxb	mRNA	32.3333	294.25	0.38	3.47	3.34	0.09	0.18	0.58	0.03	0.12	0.129356
70103	Znhit1	mRNA	913.007	724.68	66.63	72.31	69.8	80.54	106.53	106.69	99.62	79.2	0.0351885
100503361	Tmem95	mRNA	1.5	1	0	0.26	0.09	0	0.08	0.09	0	0	0.961183
232449	Dera	mRNA	267	291	10.31	11.36	13.17	15.33	13.56	13.12	10.33	12.92	0.912212
73390	Msl3l2	mRNA	10.1667	11.75	0.27	0.37	0.68	0.26	0.49	0.72	0.24	0.16	0.963767
217305	Cd300ld	mRNA	103.327	150.493	0.55	4.91	6.13	5.96	5.13	2.45	2.25	3.61	0.936205
226849	Ppp2r5a	mRNA	949.17	1028.04	23.74	25.07	24	21.05	22.25	25.09	19.55	20.37	0.989066
66136	Znrd1	mRNA	598.833	545	66.35	58.16	56.48	72.89	71.42	72.29	77.82	76.48	0.350878
93747	Echs1	mRNA	873.833	983.75	51.19	52.13	44.32	46.7	45.91	48.8	43.41	37.79	0.961183
227292	Ctdsp1	mRNA	2113.67	2140.5	43.37	57.1	54.75	62.54	46.94	67.84	42.47	58.34	0.922508
13389	Dll3	mRNA	0.666667	0.75	0.07	0	0	0.03	0.03	0	0	0.03	0.961183
239114	Il17d	mRNA	0	0.75	0	0.06	0.12	0	0	0	0	0	0.908328
13732	Emp3	mRNA	2437.17	2234.5	315.55	208.45	206.08	221.4	236.08	275.97	329.95	271.07	0.544872
13211	Dhx9	mRNA	2251	5049.5	83.43	84.29	83.39	51.37	33.91	40.22	28.39	37.03	3.81348e-05
210554	Hus1b	mRNA	3.16667	1.75	0.38	0	0	0.06	0.25	0	0.65	0.12	0.830322
12738	Cldn2	mRNA	0.666667	4	0.12	0.04	0.38	0.08	0	0	0	0	0.218518
102634333	1110002E22Rik	mRNA	8.16667	30.75	0.21	0.04	0.28	0.31	0.05	0.01	0.02	0.03	0.0167676
72787	Ndc1	mRNA	872.167	1028.5	19.34	20.98	21.65	23.93	18.63	17.25	17.51	19.62	0.902126
109054	Pfdn4	mRNA	1367.33	1100.75	119.45	103.79	93.7	108	108.67	122.18	148.29	146.83	0.288468
21646	Tcte2	mRNA	22.5	13.75	0.26	0.8	0.64	1.18	1.02	1.42	0.65	1.58	0.533455
18106	Cd244a	mRNA	81.8333	75.5	0.32	2.66	1.88	1.08	1.39	3.93	1.63	0.61	0.854657
101985	Usb1	mRNA	726.333	639.25	19.56	25.01	25.32	35.08	33.73	34.92	26.87	31.03	0.276085
268885	Stfa2l1	mRNA	56.1667	107.75	42.71	17.57	29.07	11.76	27.89	9.78	8.72	7.45	0.434646
78655	Eif3j1	mRNA	19.5567	25.9575	0.32	1.09	0.58	1.07	0.36	0.41	0.22	0.77	0.641353
17215	Mcm3	mRNA	2626	3794.75	87.18	101.62	96.61	85.72	61.43	67.3	65.7	74.41	0.122315
22245	Uck1	mRNA	563.167	629.5	24.62	25.07	22.13	21.01	22.96	23.44	21.69	22.51	0.942418
22141	Tub	mRNA	0.666667	1	0.01	0	0.02	0.01	0.03	0	0	0	0.963767
26405	Map3k2	mRNA	731	1049.25	6.18	7.75	7.66	5	5.06	5.29	4.38	3.82	0.175382
108168049	Gm46390	mRNA	40.27	41.035	3.11	1.67	2.46	1.95	2.42	1.91	2.56	2.56	0.950642
12496	Entpd2	mRNA	10	33.25	0.78	1.44	2.37	0.4	0.4	1.36	0.15	0.11	0.458474
14809	Grik5	mRNA	26.6667	30.5	0.66	0.52	0.7	0.4	0.82	0.59	0.19	0.56	0.983001
21648	Dynlt1b	mRNA	245.833	298.072	30.35	32.94	38.39	23.16	25.49	35.27	16.6	26.86	0.816415
68058	Chd1l	mRNA	504.667	636	18.07	13.32	12.76	16.54	14.41	11.24	12.96	16.06	0.961183
238055	Apob	mRNA	1.66667	0	0	0	0	0	0	0.05	0	0	0.646192
67859	Cysrt1	mRNA	3.83333	1.25	0	0.1	0.21	0.2	0.6	0.78	0.32	0.1	0.496824
12223	Btc	mRNA	1.5	1	0	0.02	0.07	0	0.09	0.08	0	0.02	0.903265
15166	Hcn2	mRNA	2.16667	2	0.02	0.07	0.07	0.02	0.02	0.09	0.02	0.04	0.985359
60440	Iigp1	mRNA	2013.61	1122	1.27	25.86	31.07	48.76	141	29.19	46.29	43.84	0.471607
50931	Il27ra	mRNA	99	81	0.88	2.3	3.2	2.43	1.67	3.67	1.56	2.78	0.866674
14778	Gpx3	mRNA	656.667	1446	33.15	60.56	151.65	36.54	16.3	57.65	9.95	14.69	0.238683
192652	Wdr81	mRNA	582.5	631	4.82	6.32	6.24	6.11	7.11	6.5	4.31	5.38	0.858912
66366	Ergic3	mRNA	1984.5	1965.25	123.62	99.95	109.13	117.82	114.21	117.41	136.68	108.53	0.718533
100502736	Gm19345	mRNA	1.76167	1	0.08	0.24	0	0	0.15	0.08	0	0.27	0.961183
545655	Gm13287	mRNA	0.2	0.5575	0.12	0	0.24	0	0	0	0.19	0	0.992335
140792	Colec12	mRNA	181.295	262.695	3.53	6.98	8.6	3.19	5.38	4.99	2.41	2.82	0.617108
59021	Rab2a	mRNA	1443.33	1428	51.67	47.84	49.71	52.06	50.15	56.1	49.33	51.94	0.629224
28078	Prl5a1	mRNA	0	0.5	0	0	0	0.14	0	0	0	0	0.950642
20170	Hps6	mRNA	153.667	173.25	4.31	4.29	4.11	5.45	5.38	4.36	3.64	4.7	0.943525
102635661	LOC102635661	pseudo	4.21167	6.5025	0.16	0.18	0.12	0.06	0.04	0.09	0.06	0.04	0.537509
246229	Bivm	mRNA	470.833	616.75	12.82	14.25	13.71	11.93	8.41	11.45	8.55	10.24	0.122933
240120	Zfp119b	mRNA	73.5	91	2.61	2.98	3.18	2.53	2.8	2.98	2.2	2.4	0.950642
259051	Olfr658	mRNA	0	0.25	0	0	0.02	0	0	0	0	0	0.961183
100034684	BC100530	mRNA	7.5	65.2375	32.81	6.94	11.89	4.35	2.06	2.06	1.3	1.45	0.00261813
233904	Setd1a	mRNA	1497.5	2094.25	26.85	24.06	24.04	22.79	18.2	20.57	11.09	21.86	0.288529
320302	Glt28d2	mRNA	32.5	40.25	1.03	0.92	1.02	1.19	1.17	0.67	0.88	1.05	0.983382
667794	Gm8817	mRNA	0.166667	0.25	0	0	0	0.15	0	0	0	0	0.961183
70650	Zcchc8	mRNA	737.167	893.25	25.65	24.31	23.59	23.33	24.3	21.32	19.64	23.45	0.800664
18951	2021-09-05	mRNA	299.842	289.132	9.39	9.91	8.59	11.03	10.56	14.77	10.49	7.38	0.69171
68047	Mpnd	mRNA	884.167	699.5	26.03	26.44	23.57	41.86	34.01	42.24	36.36	43.34	0.198721
100647	Upk3b	mRNA	0.333333	0.25	0	0.04	0	0	0	0	0.07	0	0.961183
380712	Tlcd2	mRNA	23.1667	28	1.13	1.42	2.34	1.36	1.72	2.78	0.29	1.41	0.992335
547097	B020011L13Rik	mRNA	0.166667	2.5	0.05	0.13	0.03	0.05	0	0	0	0.03	0.467257
625424	Gm6583	mRNA	0.5	0.5	0	0.06	0	0	0	0.03	0	0.06	0.961183
66570	Cenpm	mRNA	423.5	362.75	23.22	20.32	20.87	30.02	32.08	26.65	26.59	45	0.281646
65086	Lpar3	mRNA	1.66667	1.5	0	0.06	0.06	0.06	0.11	0.06	0	0.08	0.942557
11642	Akap3	mRNA	0.833333	0	0	0	0	0	0.02	0	0	0.04	0.888428
194908	Pld6	mRNA	0.166667	0.5	0	0.04	0	0.04	0	0.04	0	0	0.961183
17254	Slc3a2	mRNA	9158.24	8257.35	281.61	238.12	238.34	359.07	423.97	321.58	470.23	409.62	0.250306
230376	Haus6	mRNA	867	1218.25	19.32	18.92	18.57	13.94	14.05	12.86	13.31	13.35	0.312524
72325	Vps9d1	mRNA	205.167	274.25	6.02	6.48	7.82	6.03	5.14	6.7	3.37	5.87	0.597431
57837	Eral1	mRNA	614.5	733.25	39.05	19.12	20.25	26.07	26.44	22.29	25.66	25.29	0.992335
19951	Rpl32	mRNA	32316.3	27092.8	6070.58	4316.17	3866.89	5023.79	6296.62	4828.12	8006.83	6755.74	0.250634
19935	Mrpl23	mRNA	1033.33	709.75	95.22	84.23	84.19	148.94	173.8	134.76	202.96	165.57	0.0514265
14248	Flii	mRNA	1742.17	2149.75	34.29	38.8	36.33	37.99	36.53	35.08	30.1	31.11	0.920724
320981	Enpp6	mRNA	1.16667	2.5	0.03	0.05	0.08	0	0.05	0.03	0	0.01	0.892011
18595	Pdgfra	mRNA	141.667	487.75	1.94	7.49	9.53	1.65	2.14	2.08	1.21	0.73	0.050233
20524	Slc25a17	mRNA	890.333	901	38.8	39.38	41.56	37.96	37.63	43.47	41.35	38.44	0.729806
26430	Parg	mRNA	796	1041.25	15.71	16.07	16.66	13.65	12.83	11.71	11.65	11.54	0.311751
74781	Wipi2	mRNA	1300.83	1615	32.43	29.14	28.58	23.03	22.98	24.98	20.09	24.72	0.640182
227656	Rexo4	mRNA	689.5	792.25	20.85	27.58	25.84	25.08	23.85	24.18	20.38	24.12	0.994229
668110	Syce1l	mRNA	0	0.5	0.21	0	0	0	0	0	0	0	0.950642
12928	Crk	mRNA	2934.67	2836.5	52.64	50.79	47.63	44.55	41.84	48.04	36.71	40.46	0.835149
64659	Mrps14	mRNA	703.667	544.5	35.05	31.01	29.83	36.01	42.23	44.23	47.03	47.4	0.0856667
209200	Dtx3l	mRNA	834.413	888.847	2.58	11.88	12.84	20.02	17.7	13.03	14.78	10.6	0.777414
15446	Hpgd	mRNA	28.8333	27.25	0.08	1.25	2.65	0.66	0.78	3.42	0.3	0.16	0.99091
56174	Nagk	mRNA	394.167	307.75	8.29	18.11	18.87	24.79	27.41	27.5	20.84	23.4	0.218518
243978	Mrgprx2	mRNA	0.333333	3.5	0.03	0.05	0.12	0.01	0	0	0	0	0.269604
67903	Gipc1	mRNA	1786.17	1858	88.91	75.01	67.59	103.91	89.59	91.52	75.85	97.04	0.77273
18538	Pcna	mRNA	4607	4639.75	254.26	302.85	270.96	275.38	269.21	264.54	281.1	297.42	0.756017
104080	Nxph4	mRNA	123.833	104.25	3.42	3.76	3.69	7.2	3.91	6.99	3.93	5.78	0.791901
236749	Gm4907	mRNA	0.166667	0	0	0	0	0	0	0.06	0	0	0.961183
67988	Tmx3	mRNA	971.333	1196	14.75	21.61	20.72	15	11.99	18.95	11.63	11.45	0.415223
68401	G6pc3	mRNA	904.833	758.5	30.36	35.04	35.44	43.32	36.92	52.09	38.89	48.76	0.189759
403395	Clec3a	mRNA	0	0.25	0	0	0.02	0	0	0	0	0	0.961183
15482	Hspa1l	mRNA	99.265	95.1575	1.82	2.87	2.86	3.65	2.53	3.68	2.28	3.43	0.841961
240055	Neurl1b	mRNA	18.3333	33.5	0.08	0.61	0.61	0.21	0.27	0.34	0.16	0.14	0.737556
74488	Lrrc15	mRNA	24.6667	25	0.03	0.41	0.85	0.03	0.83	0.83	0.05	0.01	0.950642
67020	Tmem88	mRNA	431.225	350.5	9.98	10.14	9.99	34.12	17.19	18.27	26.26	25.11	0.568149
74145	F13a1	mRNA	625.167	3077.5	13.8	70.26	135.58	4.03	5.64	29.78	1.43	4.93	0.254993
14465	Gata6	mRNA	2.16667	5.25	0.07	0.13	0.27	0	0	0.12	0.05	0.02	0.791601
71653	Shtn1	mRNA	115.833	194.25	0.75	4.35	5.79	2.46	4.25	3.02	1.21	0.93	0.838487
59057	Zfp24	mRNA	817.167	1099.5	27.41	22.73	22.03	15.82	19.12	15.64	14.16	16.5	0.329735
319277	Washc4	mRNA	746.44	1051.94	10.23	15.75	14.85	12.16	10.75	11.16	10.31	9.04	0.321245
207819	4930539E08Rik	mRNA	3.83333	7.25	0.04	0.1	0.12	0.13	0.1	0.12	0.06	0.01	0.961183
225896	Ubxn1	mRNA	2275.67	2093.25	169.96	128.91	127.33	171.71	183.58	149.24	193.2	181.59	0.448835
26441	Psma4	mRNA	3525.83	3399.5	239.25	231.16	216.37	253.5	280.38	237.1	258.7	256.58	0.447662
98999	Znfx1	mRNA	837.833	1085.25	6.3	13.08	16.07	22.48	20.05	15.47	11.2	12.5	0.961183
67197	Zcrb1	mRNA	1391	1361.75	163.61	117.45	108.65	132.77	123.11	115.06	148.4	158.66	0.838487
70359	Gtpbp3	mRNA	432.833	437.75	8.82	10.09	10.67	15.14	14.04	11.16	12.38	11.61	0.631453
102632693	Gm30698	mRNA	1.33333	1	0	0	0	0.26	0	0	0.27	0	0.98205
226351	Tmem185b	mRNA	649.5	657.75	13.42	17.68	17.62	16.92	14.03	18.95	16.37	15.37	0.895069
83995	Mmp1a	mRNA	3.5	8.25	0.18	0.61	0.36	0.03	0.03	0.11	0	0.14	0.424381
14426	Galnt4	mRNA	219.5	342.25	5.17	4.92	5.07	3.38	2.82	3.78	2.73	2.73	0.139027
170732	Trhr2	mRNA	0.833333	1	0	0.06	0	0.07	0.04	0.12	0.06	0	0.961183
60596	Gucy1a1	mRNA	5.5	7.5	0.01	0.23	0.17	0.04	0.04	0.16	0.11	0.01	0.961183
14086	Fscn1	mRNA	226.333	215.75	2.74	5.85	9.65	4.73	6.52	11.39	2.73	5.5	0.866088
67949	Nifk	mRNA	1671	1789.25	86.26	66.01	60.35	60.22	57.46	65.14	68.05	64.95	0.994628
66997	Psmd12	mRNA	2496.67	3144.25	150.13	142.38	134.91	104.16	108.81	102.91	108.18	115.37	0.699118
24061	Smc1a	mRNA	1555	2234.75	40.51	46.15	42.98	35.59	29.96	32.25	29.55	34.28	0.163371
101055672	LOC101055672	mRNA	8.15833	5.125	0.08	0.27	0.33	0.55	0	0.85	0.48	1	0.715022
14934	Gypa	mRNA	2	0.25	0	0	0.04	0	0	0.3	0.04	0	0.719702
65255	Asb4	mRNA	3	4.75	0.02	0.17	0.09	0.1	0.02	0.12	0.04	0.04	0.84035
24057	Sh3yl1	mRNA	148.333	179.25	8.69	8.58	8.37	4.45	5.91	7.95	5.75	5.42	0.876031
102635360	Gm32719	mRNA	1.74833	3.2125	0.24	0.34	0.34	0.16	0.28	0.09	0	0.16	0.882138
74178	Stk40	mRNA	618.833	713	14	14.39	13.89	14.33	13.94	15.18	9.52	15	0.992335
12823	Col19a1	mRNA	6	33	0.17	0.04	0.45	0.19	0	0	0	0	2.28084e-05
20564	Slit3	mRNA	46.5	232.5	1.89	4.88	5.78	0.45	1	1.13	0.34	0.17	0.0389383
385674	Zfp174	mRNA	26	33	0.2	0.38	0.53	0.48	0.4	0.6	0.24	0.2	0.999095
75352	4930550L24Rik	mRNA	0.166667	0	0	0	0	0	0	0.05	0	0	0.961183
619297	Ccdc194	mRNA	2.5	1.75	0.05	0.02	0	0.05	0.03	0.04	0.02	0.07	0.961183
29867	Cabp1	mRNA	45.3333	34	1.19	2.81	2.1	3.16	1.49	4.31	1.05	4.92	0.840429
232087	Mat2a	mRNA	3417.67	3769.25	31.95	109.49	100.28	137.55	77.77	97.07	65.2	95.89	0.961183
71764	C2cd2l	mRNA	452.167	565.25	12.65	11.26	12.5	9.48	9.91	10.66	6.69	10.76	0.613892
76072	Rnf183	mRNA	13.5	23.5	1.32	1.59	1.03	1.47	0.72	0.91	0.38	0.53	0.269604
12177	Bnip3l	mRNA	2676.33	3114.5	77.63	75.07	73.31	44.55	40.94	68.94	56.65	46.62	0.718533
72098	Tmem68	mRNA	525.5	519.5	14.82	18.29	15.21	14.55	15.62	18.94	14.47	14.72	0.973517
56760	Clec1b	mRNA	6.5	5.75	0.14	0.26	0.13	1.01	1.31	0.28	0.6	0.13	0.837989
240038	Zfp994	mRNA	295.29	274.103	2.81	4.94	3.65	4.17	3.74	4.97	3.68	4.44	0.655307
22239	Ugt8a	mRNA	0.833333	0.5	0	0.02	0.02	0	0	0.06	0	0	0.961183
74670	Zfp943	mRNA	116	143.25	2.88	4.2	4.08	3.67	3.55	3.26	2.71	2.83	0.796869
64136	Sdf2l1	mRNA	686.667	661.5	45.21	44.49	41.76	49.95	58.21	50.57	52.13	49.92	0.260842
74337	Palm3	mRNA	45	54.25	1.59	1.71	1.66	1.39	0.87	1.44	1.25	1.14	0.689922
77035	Kdm8	mRNA	98.5	116	2.57	4.06	3.28	3.05	1.72	2.97	1.65	3.56	0.773623
67115	Rpl14	mRNA	15551.7	13020.5	1120.65	1026.22	991.52	1194.73	1340.01	1148.58	1609.63	1712.01	0.128635
69277	3300002I08Rik	mRNA	10.5	21.25	2.96	1.97	2	1.93	1.01	1.32	1.84	0.63	0.54167
66245	Hspbp1	mRNA	818.333	645	33.83	26.22	25.48	40.14	36.46	41.52	35.86	48.54	0.256086
78914	Nadsyn1	mRNA	150.5	119.5	2.83	4.13	3.21	4.26	4.91	6.13	3.89	5.66	0.245659
94088	Trim6	mRNA	45.3333	58.25	1.19	0.87	0.96	1.39	1.1	0.74	1.35	1.03	0.980952
63958	Ube4b	mRNA	778.833	915.25	8.05	13.7	13.35	10.8	9.9	12.49	6.56	9.69	0.799391
386655	Eid2	mRNA	9.33333	14.5	0.64	0.94	1	0.79	0.9	1	0.18	0.34	0.865886
232345	A2m	mRNA	4.16667	55.25	0.06	1.05	2.2	0	0.11	0.03	0	0.03	0.0571377
70771	Gpr173	mRNA	1.33333	5	0.01	0.12	0.12	0.04	0.04	0.03	0	0.03	0.634347
242341	Atp6v0d2	mRNA	223	144.25	2.01	1.17	2.73	9.99	18.96	6.74	4.06	4.8	0.325089
16971	Lrp1	mRNA	1400.5	2246	6.25	12.22	14.29	8.39	9.91	8.57	3.52	6.53	0.463527
77951	Cyp20a1	mRNA	597.765	644.885	20.5	22.41	19.81	20.95	18.5	21.14	22.17	19	0.961183
100502967	Speer4c	mRNA	0	0.245	0	0.06	0	0	0	0	0	0
17119	Mxd1	mRNA	354	304.25	2.97	4.24	4.81	6.02	10	5.63	5.06	3.9	0.356251
66455	Cnpy4	mRNA	549.667	459	13.58	20.86	22.23	18.21	20.59	29.5	16.7	19.3	0.439575
223774	Alg12	mRNA	307.5	254.5	8.37	7.75	7.4	10.72	11.85	11.36	10.07	12.99	0.123201
171188	Vmn1r32	mRNA	0.666667	0.75	0	0.03	0.03	0.03	0	0	0	0.03	0.950642
110172	Slc35b1	mRNA	1005.33	1096	80.97	57.61	54.92	61.86	71.63	61.87	63.49	68.65	0.90386
59053	Hgh1	mRNA	791.833	723.75	28.03	23.41	23.81	30.81	29.99	26.67	31.09	36.63	0.415223
67219	Med18	mRNA	125.833	158.75	5.97	8.35	7.03	6.29	6.64	4.82	5.54	6.32	0.883558
72667	Zfp444	mRNA	219.167	169	6.89	5.37	5.35	8.66	10.8	10.12	8.74	7.28	0.229196
327951	Cyb5d1	mRNA	412.5	521.75	6.48	13.13	12.42	9.51	8.45	10	6.36	7.8	0.634558
229801	Tram1l1	mRNA	0.5	0.25	0	0	0.03	0	0.03	0	0.03	0	0.961183
56036	Ccnl2	mRNA	2266.33	1973.75	42.23	36.79	38.17	50.03	61.52	50.27	63.27	61.13	0.133385
668894	Gm14025	mRNA	3.5	9.5	0.06	0.07	0.09	0.06	0	0.02	0.02	0.04	0.297474
67169	Nradd	mRNA	28	16.5	0.58	1.06	1.38	1.27	1.44	2.1	0.67	2.2	0.573221
232798	Leng8	mRNA	1270.5	1916.25	18.27	31.01	33.64	30.83	20.04	22.63	14.47	21.7	0.190811
22695	Zfp36	mRNA	519.167	711.5	33.94	30.67	28.85	23.7	35.18	27.13	16.82	17.1	0.780658
73542	Tssk5	mRNA	0.666667	0.25	0	0.04	0	0	0.05	0	0.04	0	0.961183
12933	Crmp1	mRNA	2.66667	4.75	0	0.27	0.14	0.05	0.09	0.1	0	0.09	0.947357
14673	Gna12	mRNA	250.167	527.25	18.09	21.59	27	14.59	14.19	14	6.32	10.02	0.0505041
619597	Gal3st2c	mRNA	0.166667	0.5	0.02	0	0	0.02	0	0	0	0	0.950642
243914	Lgi4	mRNA	12.6667	19.25	0.13	0.5	0.73	0.25	0.24	0.88	0.09	0.06	0.942557
68876	Atp23	mRNA	337.667	354	24.87	18.63	19.87	20.82	17.62	21.4	24.14	24.83	0.923235
66717	Ccdc96	mRNA	16.6667	23.75	0.39	0.52	0.59	0.36	0.43	0.17	0.28	0.51	0.892092
53324	Nptx2	mRNA	0.333333	0	0	0	0	0	0.05	0	0	0	0.942557
102462	Imp3	mRNA	1395.67	1027.5	100.87	84.5	71.73	100.56	92.34	124.18	147.71	129.98	0.169483
22371	Vwf	mRNA	63	103	0.78	0.79	1.38	0.27	0.69	1.09	0.25	0.29	0.792209
19942	Rpl27	mRNA	15037.2	10901.6	1419.62	1017.44	998.21	1385.86	1398.7	1489.35	2039.83	2031.99	0.13013
69638	Enho	mRNA	15.3333	15	0.42	0.98	1.22	1	1.57	0.78	0.31	1.22	0.961183
100043254	Nps	mRNA	0	0.25	0	0.09	0	0	0	0	0	0	0.961183
211064	Alkbh1	mRNA	388.41	390.998	19.39	12.81	12.75	12.85	14.55	13.51	16.61	18.45	0.775157
320590	Svopl	mRNA	0.666667	0.75	0	0.05	0	0.03	0	0	0	0.02	0.961183
12023	Barx2	mRNA	4.16667	4.5	0.16	0.25	0.25	0.08	0.23	0.31	0.04	0.08	0.985359
193736	Zbtb12	mRNA	271	305	7.03	12.68	10.44	16.85	10.06	12.71	8.82	14.44	0.961183
12331	Cap1	mRNA	4705.73	5728.75	130.47	168.78	161.34	126.46	129.3	154.33	116.55	108.13	0.814326
58916	Myot	mRNA	23.3333	155	7.66	0.96	7.11	4.59	0	0	0	0.16	0.000154085
75761	Apol7a	mRNA	172.5	110.5	0.56	1.23	1.35	9.36	8.78	3.19	7.99	7.41	0.400332
56228	Ube2j1	mRNA	1143.83	1305.75	30.83	24.65	25.65	23.15	25.27	25.37	23	24.98	0.991765
211673	Arfgef1	mRNA	1483.17	2539	22.1	30.05	27.75	19.35	14.01	17.64	12.04	13.17	0.00172509
77929	Yipf6	mRNA	539.5	700.75	9.78	11.93	10.39	8.31	8.19	8.03	8.09	6.11	0.413613
16891	Lipg	mRNA	73.6667	654	0.99	31.96	15.69	0.2	0.36	5.98	1.66	0.21	0.380111
15968	Ifna5	mRNA	0.166667	0	0	0	0	0	0	0	0.15	0	0.961183
13637	Efna2	mRNA	62.3333	49.75	0.94	1.74	1.36	2.63	1.66	2.57	2.04	2.51	0.555442
76229	Vmn2r29	mRNA	1	1.25	0.06	0.03	0	0.05	0	0.03	0.03	0.03	0.961183
404337	Olfr1383	mRNA	4.33333	3.25	0.25	0.25	0.42	0.16	0.56	0.27	0.09	0.32	0.961183
11544	Adprh	mRNA	959.667	881.5	37.96	42.59	41.99	40.64	38.23	51.16	42.34	51.86	0.335682
67145	Tomm34	mRNA	833.833	798	30.41	23.16	23.35	37.74	33.63	34.97	32.89	33.03	0.598777
271278	BC024139	mRNA	0.333333	0	0	0	0	0	0	0	0	0.05	0.940128
76594	Dnajc18	mRNA	310	369.5	4.81	4.48	4.75	5.64	5.36	4.24	4.13	4.41	0.98205
230648	Efcab14	mRNA	478.5	675.5	9.41	11.04	11.27	9.35	7.24	9.36	5.87	6.78	0.0511786
381104	Prickle4	mRNA	6.5	8.25	0.32	0.39	0.83	0.37	0.49	0.55	0.27	0.18	0.950642
233752	Insc	mRNA	0.166667	0.5	0	0.03	0	0.03	0	0	0	0	0.950642
67153	Rnaseh2b	mRNA	321.833	341	18.81	17.65	15.92	16.69	17.86	14.24	17.68	18.55	0.93807
226695	Ifi205	mRNA	398.022	318.745	3.54	24.18	21.2	9.27	21.59	59.83	7.02	9.88	0.689552
11774	Ap3b1	mRNA	1600.67	1934	32.76	34.62	33.12	33.46	35.72	30.47	27.61	26.74	0.942557
12257	Tspo	mRNA	1221.5	912.25	65.39	76.16	70.83	123.2	181.62	107.43	139.99	90.8	0.121321
17850	Mut	mRNA	345.333	478.5	5.48	11.77	10.75	8.45	6.98	7.86	5.35	6.87	0.376935
74213	Rbm26	mRNA	376.5	483	5.81	10.72	8.7	7.57	7.01	6.3	7.02	6.11	0.751605
12350	Car3	mRNA	312	1164.25	28.73	2.33	103.39	87.1	0.6	6.54	0.69	5.37	0.0218928
217201	Rundc1	mRNA	353.822	369.21	7.59	7.87	7.81	8.93	9.16	7.91	7.86	8.71	0.674975
223455	2021-03-06	mRNA	2636.33	3098.25	27.21	38.89	38.39	32.43	25.79	32.93	25.86	28.39	0.579446
73723	Sh3bgrl3	mRNA	1296	1036.5	96.72	109.81	116.06	156.94	187.31	193.15	129.67	149.93	0.0531514
12828	Col4a3	mRNA	2.83333	2	0.02	0	0.03	0.02	0.02	0.04	0.01	0.03	0.915302
574403	Fam196b	mRNA	0	0.75	0	0.01	0.03	0	0	0	0	0	0.908328
385377	Pnma5	mRNA	420.293	408.525	9.87	9.88	8.15	17.71	17.31	11.59	14.85	13.39	0.527462
67895	Ppa1	mRNA	3769.17	4111	271.57	236.45	216.43	225.92	222.46	227.21	214.06	246.32	0.961183
22255	Uncx	mRNA	0	0.25	0.04	0	0	0	0	0	0	0	0.961183
69073	Kdf1	mRNA	3.5	0.25	0	0	0	0.04	0.44	0.05	0	0	0.611282
108167415	Gm45978	mRNA	126.068	221.795	22.66	5.22	3.36	1.81	6.59	6.14	5.97	4.84	0.833386
27375	Tjp3	mRNA	107.833	102.25	2.4	1.73	1.99	3.44	3.94	3.1	2.1	2.74	0.583871
12192	Zfp36l1	mRNA	1150.5	984.5	13.8	25.02	31.33	22.92	28.88	28.36	37.47	20.37	0.414468
380959	Alg10b	mRNA	855.5	1658.25	33.59	35.84	33.14	21.9	16.17	16.5	16.68	14.25	0.0021198
23830	Capn10	mRNA	170.167	258.25	8.48	5.88	5.82	5.14	4.45	5.34	2.98	4.3	0.281646
434246	Trim72	mRNA	10.6667	58.25	1.34	0.32	2.21	2.5	0	0.03	0.06	0.13	5.22172e-05
234683	Elmo3	mRNA	45.3333	31	0.33	0.52	0.77	1.86	1.65	0.92	1.09	1.82	0.528715
98558	Mael	mRNA	123.667	106.75	4.44	4.77	4.85	6.18	7.39	5.53	5.75	6.85	0.300459
228876	Zfp334	mRNA	4.83333	7	0.01	0.08	0.25	0.04	0.09	0.13	0.07	0.03	0.974042
30794	Pdlim4	mRNA	52.8333	68.5	0.89	4.01	7.66	4.91	4.18	6.72	1.83	2.22	0.961183
223332	Ranbp3l	mRNA	0.5	0.25	0	0	0.02	0	0	0	0.03	0	0.961183
210583	Gm4767	mRNA	82.28	82.95	2.37	3.2	2.84	2.02	2.66	2.58	3.35	2.69	0.784552
383435	Ms4a14	mRNA	43	80	0.29	1.71	2.55	0.78	1.51	1.01	0.37	0.46	0.746674
70717	Medag	mRNA	97.1667	253.5	5.43	7.79	10.52	1.32	1.49	6.63	0.78	0.93	0.286406
78323	Fam219b	mRNA	298	310.25	6.15	7.15	7.91	7.42	6.4	7.59	6.5	7.8	0.89933
60364	Donson	mRNA	481	473.5	11.49	18.08	17.67	12.6	13.11	18.3	12.13	20.06	0.92745
668257	Dgat2l6	mRNA	0.5	0	0	0	0	0	0	0	0	0
16492	Kcna4	mRNA	0.333333	1.75	0	0.04	0.01	0.04	0.01	0	0	0	0.724786
67973	Mphosph10	mRNA	1515.67	1779.75	62.56	60.87	54.62	53.22	53.65	47.68	55.51	56.08	0.992335
69900	Mfsd11	mRNA	712.278	623.5	12.83	19.01	21.65	20.89	22.37	23.99	16.9	21.44	0.349736
242594	Fyb2	mRNA	14	9.25	0.03	0.22	0.26	0.37	0.12	0.39	0.07	0.65	0.955262
12049	Bcl2l10	mRNA	0.166667	0.5	0	0	0.06	0.06	0	0	0	0	0.950642
52858	Cdipt	mRNA	1057.67	979.5	25.37	27.78	29.07	39.45	36.28	38.71	30.56	34.58	0.379169
19326	Rab11b	mRNA	1822.83	2127	75.72	71.53	73.73	76.42	70.47	79.28	62.46	66.09	0.961183
231103	Gckr	mRNA	0.833333	0.5	0	0.03	0.03	0	0.03	0.07	0	0.03	0.937064
207777	Tspoap1	mRNA	177.667	159	0.42	0.3	0.32	5.86	4.18	0.68	3.16	3.3	0.834963
227059	Slc39a10	mRNA	1439.17	1955.5	19.47	39.91	32.43	17.62	6.3	30.65	11.48	19.36	0.486485
217830	Dglucy	mRNA	110.667	100.5	1.46	2.77	2.68	2.6	2.82	3.31	2.42	2.3	0.679996
241915	Phc3	mRNA	549	785.75	4.17	5.72	5.63	4.2	3.67	4.52	2.6	3.15	0.175195
69367	Glrx2	mRNA	438.162	423.25	42.29	33.39	32.37	36.41	38.77	37.26	41.06	49.8	0.823627
223267	Ggact	mRNA	146.333	187.75	18.42	11.73	11.36	9.14	10.47	10.69	11.22	9.09	0.85042
73412	Nme8	mRNA	0	0.25	0	0	0	0.05	0	0	0	0	0.961183
12821	Col17a1	mRNA	8.5	3.75	0.03	0.01	0.1	0.05	0.37	0.04	0.07	0.04	0.506968
319701	Fbxo48	mRNA	40.1667	80	1.24	3.93	3.51	2.2	1.93	1.31	1.15	1.63	0.312924
56716	Mlst8	mRNA	358.637	408.983	8.84	8.8	7.7	8.71	8.78	8.21	8.21	8.15	0.950642
76561	Snx7	mRNA	330.167	449.75	17.5	16.6	14.47	11.58	11.13	11.99	8.51	11.45	0.262596
83796	Smarcd2	mRNA	1370	1362.75	35.01	39.41	38.98	41.25	40.71	44.12	34.67	43.13	0.548619
70370	Fbln7	mRNA	3.5	19.75	0.1	0.66	1.08	0.09	0.02	0.24	0.1	0.05	0.246926
14733	Gpc1	mRNA	1947.67	2418	61.34	47.86	42.03	47.11	49.32	44.84	37.14	44.77	0.870658
75471	1700009N14Rik	mRNA	0.166667	0	0	0	0	0	0.06	0	0	0	0.961183
100155	AI481877	mRNA	0.333333	0.25	0	0.01	0	0	0.01	0	0	0	0.992335
69719	Cad	mRNA	2322.33	3945.25	40.93	39.16	41.79	30.22	21.17	25.94	16.73	29.7	0.0448944
224291	Csnka2ip	mRNA	0	0.25	0	0.03	0	0	0	0	0	0	0.961183
70238	Rnf168	mRNA	512.085	663.61	9.23	11.22	11.13	9.68	8.36	8.16	6.93	9.36	0.379192
231296	Lrrc66	mRNA	0	1.25	0	0	0.09	0.02	0	0	0	0	0.820317
217351	Tnrc6c	mRNA	277.667	317	1.02	3.83	3.74	2.55	2.33	2.93	1.19	2.19	0.910594
52468	Ctdsp2	mRNA	1461.33	1610.75	15.62	25.11	27.53	26.71	24.7	32.42	19.31	20.83	0.940962
504193	Npcd	mRNA	412.127	364.433	4.47	5.09	4.76	7.68	7.33	8.2	5	7.28	0.297973
74053	Grip1	mRNA	3.16667	1	0.02	0.04	0.02	0	0.07	0.02	0.02	0.02	0.904392
69923	Agk	mRNA	281.167	352.75	11.38	10.98	9.74	11.36	9.64	9.2	9.19	9.7	0.839158
237397	C2cd4c	mRNA	0	0.25	0	0.01	0	0	0	0	0	0	0.961183
18639	Pfkfb1	mRNA	43.8333	42	1.29	1.87	1.73	1.95	1.49	2.43	1.42	1.87	0.936205
382034	Gse1	mRNA	473.833	451.75	2.99	3.92	4.82	6.96	6.34	5.28	4.32	6.55	0.515813
622307	5830473C10Rik	mRNA	2.66667	3	0.13	0.05	0.07	0.1	0.03	0.05	0	0.06	0.756261
16205	Gimap1	mRNA	42.3333	25.25	0.34	1.64	1.68	1.34	2.28	3.85	1.46	2.08	0.234367
227746	Rabepk	mRNA	814.333	769.75	34.82	26.7	24.31	27.39	29.45	29.16	30.91	33.03	0.653056
113868	Acaa1a	mRNA	505.053	457.365	13.31	18.15	19.08	25.3	26.34	23.01	20.44	22.91	0.272064
71801	Plekhf2	mRNA	571.167	607	15.6	14.76	13.97	14.25	16.85	13.95	14.56	14.62	0.787909
71103	Glt6d1	mRNA	0.166667	0	0	0	0	0	0	0	0	0
13654	Egr2	mRNA	193.395	295.392	11.56	6.16	6.22	3.57	5.03	4.28	2.51	2.86	0.315686
117599	Helb	mRNA	264.333	356.25	4.96	5.95	5.91	5.02	4.59	4.08	4.08	4.05	0.345361
246729	Oas1h	mRNA	0.166667	0.5	0	0.12	0	0	0.04	0	0	0	0.961183
109264	Me3	mRNA	3.66667	16.25	0.28	0.15	0.29	0.42	0.02	0.04	0.1	0	0.0427462
244757	Glb1l2	mRNA	0.5	2.5	0.02	0	0.17	0	0	0.04	0	0	0.818282
14859	Gsta3	mRNA	2.16667	0.75	0	0	0.11	0.05	0.26	0.39	0	0	0.738211
242705	E2f2	mRNA	315.167	309.25	2.41	4.05	5.44	6.86	5.53	4.57	3.72	7.89	0.794025
66128	Mrps36	mRNA	580.667	481	51.82	54.47	53.27	60.17	55.04	63.72	64.99	83.78	0.264837
12801	Cnr1	mRNA	0.166667	0.5	0	0	0.03	0	0	0	0	0	0.950642
14296	Frat1	mRNA	2.035	2.75	0.03	0.06	0.19	0.03	0.08	0.15	0.03	0.05	0.985509
216565	Ehbp1	mRNA	121.5	214.25	3.42	3.11	3.06	2.38	1.7	2.65	1.15	1.78	0.133447
217303	Cd300a	mRNA	171.692	136.702	0.66	3.43	4.6	5.73	13.49	5.87	3.36	2.63	0.505647
105244343	Gm39972	other	5514.19	7434.6	403.98	255.56	273.96	162.28	166.22	257.91	115	245.02	0.603401
109181	Trip11	mRNA	254.833	447	3.6	3.47	3.41	2.71	2.43	2.31	1.47	1.55	0.025175
72050	Kdelc1	mRNA	792.5	716.25	20.13	22.07	22.08	25.78	23.38	27.02	23.69	27.23	0.272438
408068	Zfp738	mRNA	67.8783	82.4275	0.91	1.88	1.53	1.14	1.48	2.22	0.83	1	0.961183
320840	Negr1	mRNA	4.83333	22	0.04	0.65	0.45	0.16	0.12	0.17	0.07	0.01	0.384149
75906	Fam184a	mRNA	0.5	1.25	0.03	0	0.03	0	0.02	0	0	0.03	0.961183
97159	A430005L14Rik	mRNA	212	202.5	13.68	14.51	15.23	12.87	12.6	13.94	14.62	16.59	0.82611
213056	Fam126b	mRNA	2513	2573	20.13	23.23	17.32	19.66	21.04	24.69	17.16	19.18	0.780403
240754	Lax1	mRNA	18.1667	15.5	0.16	0.55	0.73	0.44	0.73	0.44	0.52	0.79	0.773445
103406	Zfr2	mRNA	17.5	17	0.08	0.17	0.23	0.93	0.87	0.39	0.22	0.54	0.837244
13058	Cybb	mRNA	610.333	756.25	3.29	15.81	16.93	8.32	23.79	10.35	5.98	5.92	0.961183
17859	Mxi1	mRNA	897.833	1120.5	36.33	41.26	37.46	20.46	22.96	35.24	23.29	21.88	0.511461
89867	Sec16b	mRNA	9.5	28.5	0.19	0.54	0.97	0.22	0.27	0.3	0	0.02	0.450621
11532	Adh5	mRNA	1800.67	1858.5	95.13	83.87	81.64	78.43	83.13	82.19	85.04	86.61	0.894074
110960	Tars	mRNA	4924	5733	157.11	167.96	148.47	142.77	118.87	126.93	152.92	147.64	0.961183
18750	Prkca	mRNA	266.333	243.75	1.12	2.1	1.74	2.99	2.51	2.74	1.64	2.59	0.603814
70237	Bhlhb9	mRNA	9.66667	12.25	0.15	0.25	0.58	0.22	0.36	0.57	0.18	0.12	0.978002
637896	Vmn2r78	mRNA	2.83333	5.75	0.28	0.22	0.11	0.03	0.21	0	0	0.03	0.746674
68481	Mpzl1	mRNA	1248.83	1332.5	36.33	40.7	40.36	46.49	40.51	45.28	35.5	43.14	0.895398
381605	Tbc1d2	mRNA	80.3333	86.25	1.74	1.27	1.19	2.44	4.12	1.25	1.16	2.12	0.863975
67893	Tmem86a	mRNA	230.333	177	3.71	6.58	9.78	8.6	19.18	7.77	7.74	7.92	0.335682
22682	Zfand5	mRNA	1037.83	1003.5	26.55	24.93	26.68	25.82	33.92	26.61	32.88	26.66	0.360828
17909	Myo10	mRNA	1701.83	3175.25	22.59	34.03	32.44	25.5	14.85	21.92	10.97	17.5	0.00451457
208366	Rpp40	mRNA	408.5	418.5	25.06	27.78	24.71	26.99	28.61	21.13	25.1	37	0.819034
68802	Mypn	mRNA	13.5	62.75	0.89	0.07	1.56	0.79	0	0.01	0.01	0.01	2.28084e-05
14598	Ggt1	mRNA	7.83333	3.5	0.23	0.03	0.07	0.13	0.89	0.04	0.28	0	0.708542
21763	Tex2	mRNA	378.5	312.75	1.83	4.51	4.68	6.55	6.87	5.81	5.05	4.94	0.471454
30805	Slc22a4	mRNA	177.333	178	6.55	3.67	3.9	7.51	10.7	3.12	5.81	6.42	0.740617
16560	Kif1a	mRNA	26.3333	23.75	0.15	0.2	0.27	0.18	0.6	0.18	0.12	0.19	0.73131
12398	Cbfa2t3	mRNA	41.5	50.75	0.13	0.56	0.78	0.35	0.37	0.61	0.1	0.35	0.940082
246707	Emilin2	mRNA	481.167	712	7.97	18.81	19.04	5.13	15.03	14.76	4.21	5.79	0.881084
107976	Babam2	mRNA	929.833	978	50.16	52.82	52.57	51.63	44.46	53.47	44.66	57.6	0.940128
320563	Islr2	mRNA	7.66667	14.75	0.21	0.2	0.33	0.29	0.3	0.19	0.13	0.09	0.792209
18125	Nos1	mRNA	1.83333	3.75	0.04	0.01	0.05	0.01	0.01	0	0	0.01	0.505093
67459	Nvl	mRNA	898.268	1220.52	17.49	20.14	18.51	11.87	9.53	9.91	10.16	6.76	0.26674
17968	Ncam2	mRNA	0	0.5	0	0.03	0	0	0	0	0	0	0.950642
268977	Ltbp1	mRNA	987.333	1075	12.62	13.38	11.89	15.93	11.31	15.27	16.75	11	0.908328
11908	Atf1	mRNA	1699.33	2264.75	72.12	75.22	71.3	57.79	52.72	53.71	52.05	53.73	0.308056
14677	Gnai1	mRNA	6.33333	8	0.04	0.09	0.47	0.11	0.26	0.28	0.05	0.13	0.98205
381835	Sbk3	mRNA	39.8333	49.25	0.31	1.29	1.4	1.24	0.58	1.59	0.78	0.35	0.919387
21816	Tgm1	mRNA	33.6667	46	1.06	0.96	1.8	0.9	1.17	1.63	0.34	0.75	0.933323
76376	Slc24a2	mRNA	0.5	0	0	0	0	0	0	0.01	0	0.01	0.884087
66314	Tpd52l2	mRNA	2293.5	2148.75	64.26	58.88	55.91	58.52	54.91	49.39	67.19	53.46	0.469555
215114	Hip1	mRNA	217.5	384.25	0.81	4.46	5.59	2.62	2.72	3	0.76	1.59	0.564743
219135	Mtmr6	mRNA	688.833	924.5	14.81	19.35	19.37	13.74	14.83	15.73	10.3	10.78	0.37668
243725	Ppp1r9a	mRNA	11	33	0.23	0.32	0.52	0.1	0.15	0.09	0	0.13	0.212365
18984	Por	mRNA	764.167	990.75	30.63	27.73	30.36	22.75	33.17	24.31	19.3	21.44	0.922508
72053	Tmub2	mRNA	667.333	580.5	16.45	19.03	17.18	21.39	20.84	26.22	17.24	21.94	0.331707
17248	Mdm4	mRNA	1260.33	1632.75	13	17.1	18	15.59	13.46	13.8	13.73	13.23	0.605779
98758	Hnrnpf	mRNA	12660.3	14246.5	473.56	485.97	458.72	423.28	415.28	432.05	427.85	454.56	0.992601
78304	Naa38	mRNA	993.275	1012.75	207.48	168.46	167.1	153.18	135.92	161.17	151.1	190.03	0.983382
70699	Nup205	mRNA	2104.5	3115.25	47.37	42.68	42.57	38.79	38.71	33.75	31.93	38.4	0.151398
68634	Tm2d3	mRNA	607	613.75	63.36	45.93	44.17	54.63	50.48	48.11	55.69	56.01	0.922061
67732	Iah1	mRNA	199	176.25	18.34	14.19	15.03	12.58	14.98	19.62	15.16	15.29	0.692436
268297	Scml4	mRNA	5	6	0.04	0.05	0.15	0.09	0.12	0.15	0	0.07	0.961183
17762	Mapt	mRNA	14.8333	31.25	0.39	0.15	0.43	0.55	0.13	0.2	0.07	0.12	0.11593
66625	Pnisr	mRNA	1222.17	1428	19.14	25.46	25.39	22.51	19.17	22.55	18.61	21.66	0.725246
627049	Zfp800	mRNA	824.333	1099.25	15.17	17.72	16.73	12.26	10.92	13.42	10.5	10.61	0.184026
319887	E030030I06Rik	mRNA	140.533	73.1175	2.85	2.84	3.21	3.27	5.9	4.2	5.97	5.6	0.077866
20624	Eftud2	mRNA	3259.5	4560	118.49	97.09	94.84	73.52	72.66	70.09	66.42	71.93	0.323947
271127	Adamts16	mRNA	2.16667	5.5	0	0.17	0.22	0.02	0.11	0.04	0	0	0.881796
15275	Hk1	mRNA	3893	5503.25	97.19	95.65	96.18	104.63	89.81	80.67	62.48	85.67	0.236026
231866	Zfp12	mRNA	625.012	769.25	12.3	13.13	12.93	10.6	8.68	12.08	8.1	10.79	0.556788
235380	Dmxl2	mRNA	43.5	66.5	0.27	0.45	0.82	0.18	0.73	0.26	0.26	0.16	0.961183
67074	Mon2	mRNA	772	1077.5	11.91	12.29	14.94	11.49	12.96	11.4	9.06	11.12	0.330278
99887	Tmem56	mRNA	48.1667	6.25	0.11	0	0.11	0.05	1.52	0.28	0.23	0	0.179838
319478	Cxxc4	mRNA	1.5	0.75	0.01	0	0.02	0	0.05	0.01	0	0	0.917158
213582	Map9	mRNA	4.16667	3.25	0	0.02	0.09	0.03	0.01	0.13	0.01	0.02	0.961183
13876	Erg	mRNA	16.8333	24.5	0.52	0.8	0.53	0.45	0.34	1.29	0.09	0.28	0.961183
215690	Nav1	mRNA	214.167	324	0.81	1.71	2.37	1.68	1.71	1.51	0.62	1.32	0.730127
224224	Impg2	mRNA	2.5	1.5	0	0.02	0.02	0.02	0.03	0.03	0	0.05	0.868869
11991	Hnrnpd	mRNA	4128.33	5213.5	57.31	52.92	50.64	37.25	34.03	41.69	31.81	49.12	0.700349
233099	Scgb2b27	mRNA	0	103	0	0	0	58.92	0	0	0	0	7.52538e-09
18100	Mrpl40	mRNA	711.833	674.25	49.18	47.32	47.15	51.87	49.54	48.13	56.19	60.91	0.538392
72168	Aifm3	mRNA	31.8333	36.75	0.62	0.42	0.69	1.7	1.06	0.78	0.56	1.09	0.997107
16531	Kcnma1	mRNA	2	13.5	0.12	0	0.33	0.04	0	0.01	0	0.02	0.122933
70620	Ube2v2	mRNA	914.5	929.5	16.94	15.22	13.65	12.2	12.73	14.9	11.8	15.19	0.99181
72634	Tdrkh	mRNA	9.66667	14	0.05	0.33	0.26	0.29	0.2	0.32	0.19	0.18	0.974633
217119	Xylt2	mRNA	431.333	451.5	7.19	10.22	9.47	11.24	10.85	10.28	7.5	9.98	0.800664
108078	Olr1	mRNA	2.83333	1.75	0	0.06	0.06	0.03	0.14	0.08	0.1	0.02	0.767071
20441	St3gal3	mRNA	99.8333	147	3.74	5.3	4.48	4.45	3.43	4.28	2.12	3.34	0.44721
76608	Hectd3	mRNA	256	279	3.92	3.88	4.65	4.61	5.33	4.83	3.19	4.5	0.761911
12793	Cnih1	mRNA	1856.5	1792.25	108.67	80.05	78.68	87.71	77.9	94.7	89.36	100.01	0.879986
97440	B3gnt9	mRNA	194.375	196.088	3.57	7.87	7.06	5.38	5.1	9.74	3.7	4.73	0.961183
17228	Cma1	mRNA	31.8333	67.25	1.05	6.82	9.61	1.5	1.96	0.9	1.43	2.71	0.322906
18763	Pkd1	mRNA	689.262	903.05	3.27	4.7	4.73	4.76	3.2	4.15	2.15	4.21	0.574194
17147	Mageb3	mRNA	23.8467	22.1925	0.74	0.71	0.63	0.64	0.42	0.93	0.38	0.62	0.961183
56516	Rbms2	mRNA	1277.83	1006	7.52	12.16	12.69	20.66	20.15	17.7	20.52	18.07	0.170482
22594	Xrcc1	mRNA	541.667	470.75	11.96	14.71	15.47	19.36	23.79	18.26	16.59	18.39	0.178406
56233	Hdac7	mRNA	482.167	486.25	4.85	8.75	9.54	10.93	10.42	11.39	6.47	12.05	0.589102
14562	Gdf3	mRNA	13.1667	8.75	0.07	0.28	0.6	0.44	0.07	0.83	0.46	1.62	0.575083
71268	Lrrfip2	mRNA	1147.67	1227	38.81	26.63	25.68	30.94	37.53	25.69	31.29	35.17	0.888468
15039	H2-T22	mRNA	1131.08	931.072	18.8	36.48	43.14	58.75	71.44	55.98	56.82	45.36	0.205875
19376	Rab34	mRNA	663.5	592.75	22.41	31.13	27.53	42.41	32.06	38.96	38.22	39.44	0.373548
21942	Tnfrsf9	mRNA	220.167	151.75	4.61	4.54	4.89	6.81	8.66	11.82	6.28	6.5	0.0609689
286942	Kif19a	mRNA	9.16667	9.75	0.06	0.29	0.31	0.14	0.24	0.33	0.13	0.06	0.997112
269831	Tspan12	mRNA	14.8333	14.25	0.38	0.3	0.75	0.26	0.49	0.96	0.09	0.34	0.961183
20469	Sipa1	mRNA	580.667	600	6.93	12.56	13.29	13.12	13.82	14.95	7.38	12.96	0.820714
20768	Sephs2	mRNA	790.167	847	21.77	28.7	26.13	34.43	24.58	23.7	26.39	28.23	0.992335
21423	Tcf3	mRNA	958	1134.25	23.43	24.19	25.68	26.68	22.78	25.02	16.97	28.42	0.949141
68792	Srpx2	mRNA	23.5	86.75	0.32	2.32	5.56	0.31	1.15	1.31	0.13	0.17	0.392559
104681	Slc16a6	mRNA	68.3333	110.25	0.93	2.22	3.09	1.36	1.87	1.4	0.9	1.02	0.642835
67313	Inava	mRNA	5.33333	4.5	0.05	0.15	0.17	0.07	0.31	0.13	0	0.09	0.950642
20475	Six5	mRNA	166.5	109.5	1.45	2.62	2.78	3.99	4.15	5.4	2.08	4.62	0.281021
105246618	Gm41885	other	207.897	564.582	16.23	10.66	12.66	6.45	4.58	5.75	1.84	4.86	0.00769481
15464	Hrc	mRNA	7.83333	39	0.7	0.3	1.63	1.92	0.03	0.06	0.18	0.09	0.00256219
71382	Pex1	mRNA	182.525	295.64	5.56	5.42	5.05	3.8	3.65	3.44	3.18	3.08	0.0804221
71843	R3hcc1	mRNA	327	374.75	19.85	10.64	11.33	19.14	18.79	14.03	15.28	16.25	0.927435
330463	Zfp78	mRNA	2.83333	3.75	0	0.1	0.13	0.04	0.07	0.07	0.03	0.07	0.961183
56412	Noa1	mRNA	722.333	821.75	28.64	25.07	25.3	22.66	19.82	22.16	21.39	24.75	0.890197
20402	Zfp106	mRNA	2480.83	4442.75	32.8	39.41	40.35	26.24	20.77	22.27	14.48	19.61	0.000542015
18049	Ngf	mRNA	7	3.25	0	0.29	0.29	0.35	0.83	1.15	0.15	0.62	0.388333
102595	Plekho2	mRNA	1205.5	1527.75	20.3	37.16	33.89	31.86	31.14	33.55	25.86	22.77	0.990172
231148	Ablim2	mRNA	5	19	0.22	0.16	0.4	0.68	0	0	0	0.02	0.0014865
68625	Cfap57	mRNA	0.333333	0	0	0	0	0	0.02	0	0.02	0	0.940962
20147	Rs1	mRNA	0.5	0.25	0	0	0	0.01	0.01	0.01	0	0	0.961183
241627	Wdr76	mRNA	341.333	505.75	5.18	10.36	9.88	7.65	5.99	6.91	4.06	6	0.27507
74288	Spem1	mRNA	6.33333	2.75	0.45	0.08	0.08	0.22	0.22	0.64	0.15	0.65	0.726607
72042	Cotl1	mRNA	651.833	538.75	7.85	24.81	32.33	31.03	51.24	46.67	19.55	22.88	0.421594
227682	Trub2	mRNA	385.833	486.75	10.07	10.48	10.94	11.68	9.68	9.33	9.34	9.78	0.873877
110074	Dut	mRNA	2105.67	1776.25	55.27	55.28	52.32	55.81	52.49	63.47	62.17	78.14	0.32836
12916	Crem	mRNA	83.5	48.25	0.76	1.61	1.95	2.27	4.41	4.05	1.68	2.49	0.111136
233802	Thumpd1	mRNA	1106.67	1470.5	48.43	38.08	36.77	31.5	24.92	32.84	28.16	29.34	0.415892
229003	Helz2	mRNA	649	810	3.42	4.64	3.78	9.93	5.75	5.54	4.63	4.92	0.978002
102632837	Rnf212b	mRNA	0	0.25	0	0	0	0.06	0	0	0	0	0.961183
67719	2310057J18Rik	mRNA	0	2.5	0	0	0	0.55	0	0	0	0	0.680295
224092	Lsg1	mRNA	658.5	905	36.21	27.46	26.26	19.49	22.79	21.12	20.98	24.3	0.78658
15251	Hif1a	mRNA	1606.67	1938.5	28.6	32.91	35.73	28.9	39.46	31.5	22.21	20.17	0.961183
22756	Zfp94	mRNA	75.5	77.98	1.02	2.19	1.51	3.01	2.05	2.17	1.23	2.18	0.961183
14457	Gas7	mRNA	243	279.5	1.23	3.52	5	1.48	1.41	7.91	0.6	1.56	0.978078
208154	Btla	mRNA	14.8333	18.5	0.24	0.53	0.66	0.17	0.21	0.57	0.07	0.27	0.84547
271005	Klhdc1	mRNA	65.3333	60.5	0.81	1.69	1.6	1.77	2.23	1.91	1.33	1.29	0.686612
108167368	LOC108167368	mRNA	4.66667	6.5575	0.16	0.06	0.3	0.2	0.17	0.14	0.13	0.09	0.881796
68817	Ddi2	mRNA	261.693	596.688	11.17	13.28	13.46	9.34	7.94	5.85	4.84	4.56	0.00114004
66648	Tpgs2	mRNA	161	205	5.21	3.45	3.53	2.82	3.13	3.45	2.43	3.24	0.812554
80883	Ntng1	mRNA	0.333333	0	0	0	0	0	0.01	0	0	0	0.961183
11625	Ahsg	mRNA	4.83333	0.75	0.07	0	0.07	0.05	0.14	1.15	0	0	0.414077
236848	Tmem185a	mRNA	198.167	221	5.9	6.27	7.09	6.22	6.77	7.35	5.34	6.35	0.781831
68564	Nufip2	mRNA	1537	1808.75	13.55	19.38	18.5	13.08	14.79	11.84	13.1	11.42	0.818273
18291	Nobox	mRNA	0	0.5	0	0.04	0.04	0	0	0	0	0	0.950642
19255	Ptpn2	mRNA	1758.83	1963.25	109.23	88.62	79.94	80.98	88.32	79.92	86.1	89.78	0.99468
66233	Dmap1	mRNA	416.833	443.75	27.69	17.53	16.95	22.26	20.44	21.81	20.87	23.73	0.925242
16639	Klra8	mRNA	1.40833	23.4375	0	2.06	4.23	0	0.07	0	0.07	0.13	0.122902
98970	Fibcd1	mRNA	0	0.25	0	0	0.01	0	0	0	0	0	0.961183
22758	Zscan12	mRNA	203.333	269.75	6.04	3.52	3.54	3.42	4.07	3.2	3	3.54	0.83176
235315	Rnf214	mRNA	1104.84	1090.11	9.33	12.43	12.04	14.05	15.93	12.9	12.8	13.89	0.495674
73732	Muc16	mRNA	2	0.25	0	0	0	0	0.02	0	0	0	0.702841
234214	Sorbs2	mRNA	21.3333	22	0.16	0.44	0.5	0.21	0.47	0.66	0.03	0.2	0.992335
14164	Fgf1	mRNA	7.5	14.25	0.57	0.2	0.18	0.07	0.19	0.12	0.06	0.1	0.55577
101488	Slco2b1	mRNA	23.1667	104	0.38	1.91	4.93	0.16	0.17	1.54	0.02	0.18	0.346064
64540	Tspan4	mRNA	1023.58	840.727	30.84	49.03	51.92	45.07	59.74	69.6	42.08	52.93	0.158992
208092	Chmp6	mRNA	918.333	1043.75	58.04	43.38	38.8	55.85	46.24	47.71	42.54	51.72	0.973771
16582	Kifc3	mRNA	30.5	63.5	0.36	1.94	2.8	0.45	0.98	1.35	0.27	0.4	0.618278
72612	Hpf1	mRNA	1013.83	879	40.81	46.75	40.89	58.34	54.33	48.99	62.23	65.27	0.409941
209478	Tbc1d12	mRNA	234.667	275.5	5.33	5.98	6.17	5.42	5.06	6.04	5.5	5.39	0.961183
207565	Camkk2	mRNA	140.5	206.75	1.76	3.18	3.81	2.21	2.12	2.73	1.16	2.1	0.584538
74167	Nudt9	mRNA	910.167	863.75	46.43	41.01	41.07	41.17	44.16	47.43	44.12	49.04	0.505093
57257	Vav3	mRNA	194.333	232.75	2.15	3.66	4.06	5.19	5.9	3.56	2.66	3.43	0.961183
433294	Mettl21c	mRNA	0.5	2.25	0.14	0.07	0.28	0.14	0.07	0	0	0	0.516128
232943	Klc3	mRNA	112.542	143.13	8.25	4.93	4.61	4.04	4.71	4.81	4.11	3.91	0.891825
338359	Supv3l1	mRNA	1349.5	1817.75	55.4	51.6	47.22	46.32	40.79	42.35	36.73	47.03	0.639558
22156	Tuft1	mRNA	169.5	209	6.61	5.21	5.13	5.79	6.27	5.02	6.67	3.8	0.990356
19054	Ppp2r3d	mRNA	17	12.25	0.45	0.37	0.26	0.3	0.6	0.64	0.23	0.66	0.586945
21678	Tead3	mRNA	139	148.5	3.69	4.42	4.1	4.77	5.63	5.75	3.13	3.37	0.871051
67569	Mgat4c	mRNA	0.166667	0	0	0	0	0	0	0.02	0	0	0.961183
18032	Nfix	mRNA	252.5	277	1.08	3.33	5.19	4.1	3.58	5.73	1.56	3.1	0.961183
74374	Clec16a	mRNA	674.568	919.533	16.01	21.61	21.39	17.67	15.26	17.96	9.99	16.31	0.326845
105242472	LOC105242472	mRNA	0	0.5	0	0.01	0.01	0	0	0	0	0	0.950642
69875	Ndufa11	mRNA	1148.17	1109.25	36.4	27.56	25.64	28.31	31.91	30.77	25.62	38.35	0.752189
433091	Pnpla1	mRNA	9.33333	7.25	0.05	0.13	0.13	0.15	0.15	0.17	0.16	0.1	0.832218
380732	Milr1	mRNA	70	67.75	1.26	4.31	5.12	3.38	7.41	4.63	2.09	2.82	0.78331
81003	Trim23	mRNA	354.833	567.5	12.32	12.01	10.78	6.09	6.5	7.43	5.38	5.55	0.122379
68526	Gpr155	mRNA	165.667	212.75	2.56	3.47	3.44	2.44	2.16	2.66	1.93	2.44	0.477839
55987	Cpxm2	mRNA	5.16667	48.75	0.8	0.47	2.98	0.29	0.25	0.16	0	0.03	0.0375237
75410	Kmt2b	mRNA	762.333	1064.5	11.57	10.3	10.1	10.87	9.82	10.33	5.18	10.65	0.509056
12667	Chrd	mRNA	22.6667	22.25	0.25	0.24	0.57	0.8	0.49	0.16	0.39	0.82	0.992335
669149	Vmn2r88	mRNA	0.493333	0.9975	0	0.06	0.06	0	0	0	0	0	0.908328
13844	Ephb2	mRNA	6.66667	20	0.01	0.15	0.3	0.04	0.09	0.06	0.03	0.02	0.562762
54004	Diaph2	mRNA	353.667	471.75	3.27	4.21	4.03	3.71	3.93	3.56	2.73	2.77	0.756017
66330	1700020L24Rik	mRNA	10.3417	7.09	0.45	0.37	0.13	1.36	1.28	0.63	0.75	1.11	0.761825
83383	Tfap4	mRNA	411.167	403.25	13.19	10.89	12.56	14.8	12.52	14.2	14.94	15.52	0.712757
15466	Hrh2	mRNA	16.8333	31.25	0.17	0.77	1.01	0.27	0.65	0.35	0.09	0.47	0.798341
70028	Dop1b	mRNA	261.667	327.5	2.7	3.43	3.47	3.38	3.54	3.54	1.85	2.75	0.961183
105244808	Gm40353	mRNA	0.166667	0.5	0.13	0	0	0	0	0	0	0	0.950642
12837	Col8a1	mRNA	268.333	500.25	5.49	6.43	10.87	4.37	2.36	4.54	3.47	3.55	0.0890201
12834	Col6a2	mRNA	393.167	510.75	4.31	14.28	15.25	4	12.71	12.93	3.44	3.32	0.961183
20304	Ccl5	mRNA	412.167	238	24.08	38.09	52.16	43.52	180.66	48.85	57.61	78.6	0.0285497
20345	Selplg	mRNA	306.833	375.5	2.74	18	20.98	10.17	21.37	16.43	8.9	5.93	0.961183
53868	Rab25	mRNA	11.1667	4.75	0.79	0.22	0.15	0.21	3.14	0.54	0.3	0.28	0.436715
108167371	Gm45966	lncRNA	2.67	4.2625	0	0.25	0.32	0.51	0.25	0.21	0.07	0.3	0.961183
353187	Nr1d2	mRNA	975.5	1050.75	19.71	13.26	13.65	16.07	13.71	18.94	15.93	12.97	0.961183
72085	Osgepl1	mRNA	374.167	464.25	27.56	19.88	16.57	15.51	16.46	16.25	18.36	23.63	0.742607
192173	Mcrip1	mRNA	1086.67	816.25	50.04	45.01	48.01	59.88	52.94	81.28	70.01	66.38	0.123201
666060	Frmpd1	mRNA	1.16667	0.5	0	0.01	0	0.01	0.08	0	0	0	0.920551
108097	Prkab2	mRNA	214.833	327	4.42	5	5.41	4.26	3.03	3.62	2.24	3.29	0.033387
66487	Smim4	mRNA	72	80.5	20.96	16.58	21.45	9.6	12.66	12.66	11.53	17.76	0.934921
52712	Zkscan6	mRNA	239.833	204.5	7.02	5.79	5.68	6.97	9.81	7.27	7.55	7.95	0.244893
66844	Ormdl2	mRNA	1005.91	793.505	53.83	39.7	42.2	49.88	48.48	56.6	66.27	54.26	0.251186
114679	Selenom	mRNA	458.5	444.75	48.57	33.32	34.33	44.16	59.48	45.42	31.97	42.59	0.707739
544881	BB287469	mRNA	0.166667	0.25	0	0	0	0.04	0	0	0.04	0	0.992335
53317	Plrg1	mRNA	822	1141	55.56	50.59	46.76	34.4	35.77	34.28	34.11	34.46	0.389598
11842	Arf3	mRNA	1251.17	1693.25	21.11	37.34	42.7	35.1	33.49	31.08	20.47	24.78	0.692257
17095	Lyl1	mRNA	47.1667	80.75	0.29	4.55	6.51	2	2.93	3.72	0.59	1.97	0.880479
80289	Lysmd3	mRNA	563.667	701.75	9.59	15.46	15.44	8.71	7.44	10.55	9.26	7.19	0.518819
22346	Vhl	mRNA	524.333	618.5	18.9	15.68	15.02	14.45	15.12	14.38	12.47	13	0.819189
69307	Pxt1	mRNA	95	112	11.79	8.09	7.74	6.37	5.34	8.08	5.36	8.37	0.815363
30939	Pttg1	mRNA	726.667	733.5	105.81	67.77	67.53	80.84	80.09	72.89	84.48	81.24	0.940962
63954	Rbp7	mRNA	11.8333	10.75	0.14	1.75	2.61	1.46	0.83	4.2	0.44	1.06	0.961183
14873	Gsto1	mRNA	5233.83	4465.75	303.34	221.04	213.38	400.93	483.3	278.78	366.57	401.48	0.301601
214547	She	mRNA	15.6667	14.75	0.13	0.2	0.29	0.09	0.16	0.66	0.06	0.03	0.936871
12780	Abcc2	mRNA	0.166667	0	0	0	0	0	0	0	0	0
116847	Prelp	mRNA	45.6667	183.25	0.84	3.49	9.83	0.23	1.48	2.01	0.18	0.21	0.438311
69276	Sec62	mRNA	2386	2048.75	35.35	37.37	36.98	38.74	43.99	44.31	51.53	39.02	0.216534
56347	Eif3c	mRNA	8178.83	11908.8	369.09	269.53	263.32	262.84	237.96	180.26	234.44	240.02	0.574341
347722	Agap1	mRNA	48.1667	52	0.34	0.44	0.51	0.2	0.56	0.93	0.09	0.13	0.961183
67749	Mgarp	mRNA	546.667	522	39.32	33.96	27.75	26.41	23.81	34.5	30.59	34.44	0.961183
271209	Rp1l1	mRNA	0	0.25	0.01	0	0	0	0	0	0	0	0.961183
238330	Irf2bpl	mRNA	496.833	415.5	2.86	7.03	6.21	11.93	9.06	8.94	9.22	7.46	0.597594
14570	Arhgdig	mRNA	1.33333	4.5	0.52	0.15	0.3	0.36	0.07	0.08	0	0	0.271108
102633740	Gm31493	mRNA	0.333333	0.5	0	0	0.06	0.09	0	0	0	0.06	0.961183
68760	Synpo2l	mRNA	12	49.75	0.83	0.12	0.89	1.69	0.03	0.04	0	0.13	0.00166598
12227	Btg2	mRNA	75.5	105	3.2	2.08	2.74	1.56	2.25	2.31	1.1	1.22	0.622971
381077	Ccdc78	mRNA	3.66667	5	0.31	0.25	0.19	0.17	0.21	0.2	0.14	0.22	0.961183
213484	Nudt18	mRNA	196.5	191.5	7.53	6.48	7.61	8.77	10.1	9.44	8.97	7.42	0.49677
18988	Pou2f3	mRNA	0.166667	0.5	0	0.03	0.03	0	0	0	0.03	0	0.961183
242662	Rims3	mRNA	5.33333	7.25	0	0.1	0.31	0.08	0.08	0.19	0.01	0.03	0.988606
12466	Cct6a	mRNA	6988.33	7661	277.27	260.28	249.49	222.74	204.37	221.16	235.08	257.13	0.961183
11844	Arf5	mRNA	1892.33	1581.5	161.66	114.37	110.67	140.69	136.28	170.94	154.1	175.46	0.3759
13849	Ephx1	mRNA	141.5	120.75	3.7	4.93	5.66	5.89	13.33	5.77	4.6	4.39	0.456645
19276	Ptprn2	mRNA	0	0.5	0	0	0.01	0.01	0	0	0	0	0.950642
234199	Fgl1	mRNA	0.5	2.75	0.14	0.21	0.33	0.13	0	0.26	0	0	0.718572
78651	Lsm6	mRNA	699.167	690	13.53	11.77	12.11	13.39	11.35	13.99	12.74	15.31	0.728184
236792	Mmgt1	mRNA	687.667	1017	19.27	19.5	19.33	11.35	10.38	13.67	9.9	10.85	0.129356
226041	Pgm5	mRNA	3.525	10.1725	0.04	0.05	0.18	0.08	0.01	0.07	0	0.01	0.409044
20201	S100a8	mRNA	214.167	329.75	100.42	74.8	114.08	45.73	67.4	50.46	65.21	21.74	0.496824
664804	Gm7347	mRNA	6.075	3.0025	0.24	0.28	0	0	0	0.68	0.24	0	0.940082
332937	Tfap2e	mRNA	0	0.25	0.03	0	0	0	0	0	0	0	0.961183
667764	Gm15854	pseudo	2	1.165	0	0.42	0	0.1	0	0.36	0.11	0.21	0.930817
382137	Fdxacb1	mRNA	176.167	197.5	9.2	6.47	6.51	6.56	5.24	6.44	7.9	7.41	0.992335
211948	Pde12	mRNA	860.167	882.25	21.26	15.82	16.1	16.69	19.47	15.94	18.91	18.38	0.820327
26395	Map2k1	mRNA	2144.67	2225.5	57.65	71.06	69.36	67.14	56.96	74.77	63.71	59.39	0.950642
69305	Dcps	mRNA	476.333	490	28.55	32.38	30.56	32.19	34.63	33.93	27.83	34.96	0.458712
15484	Hsd11b2	mRNA	10	4.75	0	0.36	0.16	0.23	0.38	0.21	0.24	0.64	0.622376
101568	Vrk3	mRNA	341.333	315.75	11.05	13.47	14.49	13.01	12.02	17.69	10.9	15.21	0.637943
435965	Lrp3	mRNA	6.16667	15.25	0.09	0.46	0.44	0.09	0.07	0.39	0.05	0.02	0.741876
677296	Fcrl6	mRNA	2.33333	3	0.13	0	0.15	0.24	0.09	0.13	0.04	0.15	0.970287
75764	Slx1b	mRNA	125.228	105.097	1.58	1.88	1.79	2.68	2.64	2.53	1.96	2.68	0.399155
353047	Plekhm1	mRNA	385.833	452.25	4.76	6.75	6.08	6.8	8.21	7.02	3.82	4.89	0.961183
100039139	Ccdc152	mRNA	0	0.75	0.31	0	0	0	0	0	0	0	0.890634
217410	Trib2	mRNA	117	133.5	2.44	2.41	3.46	2.28	2.46	3.47	1.93	2.06	0.871218
100900	Hscb	mRNA	101.833	79.25	7.87	5.91	8.47	9.88	15.75	10.12	10.92	10.77	0.176121
56407	Trpc4ap	mRNA	1582	2066	46.54	46.49	47.55	41.01	38.92	42.14	35.23	35.91	0.560855
140494	Atp6v0a4	mRNA	39.2	89.75	2.99	1.93	1.98	0.77	0.54	1.38	0.53	0.56	0.114328
70317	Arl16	mRNA	293.833	271.75	8.56	9.93	9.63	10.5	8.14	11.88	11.11	10.74	0.639999
15900	Irf8	mRNA	1058.67	855.5	9.78	22.18	23.04	29.68	51.34	25.06	23.52	28.05	0.223769
102640171	Gm38525	mRNA	7.57167	9.8125	0.16	0.23	0.24	0.84	0.11	0.35	0.58	0.18	0.988017
54396	Irgm2	mRNA	1478.48	1362.08	1.86	23.19	23.65	59.11	61.45	22.88	34.43	35.07	0.81734
26893	Cops6	mRNA	2054.17	2126.5	150.59	151.17	138.37	151.88	161.41	144.52	149.78	143.35	0.779117
74600	Mrpl47	mRNA	865.5	669.25	58.67	58.56	49.77	74.3	75.96	68.47	87.13	86.32	0.16778
18824	Plp2	mRNA	4280.28	3514.41	230.81	203.11	205.3	277.85	258.16	315.49	362.14	290.04	0.13895
21947	Cd40lg	mRNA	0.833333	1	0	0	0.12	0.12	0.06	0.19	0	0.06	0.961183
12321	Calu	mRNA	12124.7	14595	314.23	358.33	357.47	241.31	244.88	330.55	243.07	227.57	0.60317
17064	Cd93	mRNA	552	475.25	1.21	5.33	7.01	6.15	11.29	9.74	3.27	4.09	0.565866
12833	Col6a1	mRNA	590.833	711.25	5.78	18.38	20.23	5.78	19.15	18.92	5.3	4.65	0.992335
67118	Bfar	mRNA	369.667	279.5	3.89	8.17	7.88	6.65	11.18	10.93	7.57	7.96	0.189671
67839	Gpsm1	mRNA	125	174	4.41	4.12	3.66	2.6	2.26	3.72	1.16	2.78	0.442756
13426	Dync1i1	mRNA	0.166667	0	0	0	0	0	0	0	0	0
56087	Dnah10	mRNA	6	12.25	0.08	0.04	0.04	0.07	0.05	0.03	0	0.02	0.469431
108168336	Gm46592	mRNA	0.833333	0.5	0	0.04	0	0	0	0.02	0	0.03	0.961183
70785	Dennd1c	mRNA	59.4	83.925	0.62	2.87	4.17	2.04	2.87	2.22	1.35	1.85	0.961183
30927	Snai3	mRNA	13	16.5	1.15	0.47	0.88	0.54	0.53	0.55	0.52	0.62	0.868216
100862433	LOC100862433	mRNA	96.795	46.05	5.58	7.07	5.94	9.51	12.37	15.88	21.48	12.56	0.0182523
57746	Piwil2	mRNA	20	30.5	0.5	0.2	0.4	0.4	0.38	0.32	0.08	0.2	0.741876
21787	Tfg	mRNA	1250.83	1292.75	57.35	44.99	43.99	47.31	54.83	53.38	49.88	53.4	0.560855
77045	Bcl7a	mRNA	11.1667	14	0.04	0.3	0.5	0.2	0.42	0.3	0.09	0.07	0.970179
208768	Sde2	mRNA	562.333	599	11.82	13.39	12.84	14.66	15.92	11.06	13.26	10.97	0.956915
67469	Abhd5	mRNA	439.167	437	9.47	9.91	9.4	10.31	12.25	10.78	10.4	8.97	0.556788
67739	Slc48a1	mRNA	1200.5	1057.75	22.44	24.37	25.21	46.37	64.37	31.53	28.5	41.92	0.309482
105855	Nckap1l	mRNA	519.333	699.5	3.22	13.03	17.48	7.97	15.35	11.87	4.65	4.77	0.961183
66911	Nudt16l1	mRNA	470.5	451.5	26.92	27.8	24.02	26.75	25.15	29.14	30.61	29.18	0.60126
268481	Krt222	mRNA	2.5	3	0.1	0.11	0.03	0.04	0.08	0.03	0	0.1	0.961183
320522	Bhlha9	mRNA	0.166667	0	0	0	0	0	0.06	0	0	0	0.961183
18415	Hspa4l	mRNA	1532.83	1534.75	16.32	23.44	21.25	20.06	22.33	20.42	22.75	16.42	0.778721
68709	Cilp2	mRNA	1.83333	1.5	0	0.02	0.02	0.07	0.05	0.02	0.04	0.05	0.925145
53314	Batf	mRNA	61.8333	49	1.12	5.63	6.83	3.47	6.44	10.07	4.52	4.78	0.490489
240066	Zfp870	mRNA	8.16667	10.75	0.04	0.19	0.27	0.06	0.15	0.23	0.07	0.1	0.992335
100101919	Dnah7c	mRNA	2.5	4.375	0.05	0.03	0.01	0.05	0.01	0.02	0.02	0	0.590951
100044193	Gm20939	mRNA	51.74	31.99	0.23	1.59	0.87	0.98	0.96	1.94	1	1.64	0.529696
231452	Sdad1	mRNA	1364.83	2184.25	38.43	30.19	27.96	23.84	20.89	19.72	19.56	19.42	0.141212
68177	Ebpl	mRNA	222.5	179	6.36	5.62	5.41	7.31	4.94	8.16	7.07	8.61	0.595574
15220	Foxq1	mRNA	246.333	220.25	6.98	4.83	4.8	5.52	4.5	7.05	7.22	5.73	0.765128
320609	Strip2	mRNA	78.8333	107	1.28	1.72	1.55	1.22	1.09	1.35	0.96	1.01	0.559168
110084	Dnah1	mRNA	6.33333	10.5	0.07	0.04	0.06	0.06	0.05	0.03	0.04	0.03	0.881174
26379	Esrra	mRNA	934.333	691.25	14.66	23.61	20.28	33.44	31.7	37.38	24.98	38.35	0.16778
214048	Larp1b	mRNA	780.333	850.25	35.29	27.77	27.16	32.84	30.77	26.39	31.27	34.68	0.982472
223978	Cpped1	mRNA	544.667	504	10.17	11.22	12.92	19.05	17.59	15.49	14.23	17.15	0.327023
231713	Naa25	mRNA	1176.67	1585	27.79	27.16	27.05	23.39	21.01	14.01	18.62	19.05	0.473238
12396	Cbfa2t2	mRNA	628.333	950.25	12.66	11.16	11.02	8.72	7.58	8.47	7.09	8.29	0.155346
54667	Atp8b2	mRNA	956.333	1148.5	8.35	17.14	16.7	16.06	10.15	16.85	9.5	12.64	0.879546
19185	Psmd4	mRNA	3350.17	3426.25	236.28	165.28	160.71	198.25	222.95	173.11	239.76	194.96	0.718533
17700	Mstn	mRNA	1.16667	2.5	0	0	0.18	0.08	0	0.03	0	0	0.690816
19727	Rfxank	mRNA	217.928	225.423	3.91	4.51	4.76	4.05	4.62	4.61	3.64	4.58	0.797796
546049	C330021F23Rik	mRNA	1.82667	1.995	0.05	0.09	0.05	0.17	0	0.05	0.14	0	0.961183
67661	Ift172	mRNA	195.833	212.5	2.54	2.31	2.76	3.23	3.77	2	2.66	2.75	0.892326
50929	Il22	mRNA	0.166667	0	0	0	0	0	0	0	0	0.08	0.961183
76261	0610040J01Rik	mRNA	9.66667	14.75	0.04	0.79	1.33	0.15	0.78	0.67	0.16	0.07	0.961183
330695	Ctxn1	mRNA	85.3333	69.75	4.52	3.86	4.09	4.61	4.97	8.38	3.39	5.58	0.458795
18036	Nfkbib	mRNA	582.667	548.97	38.8	26.85	25.67	26.54	43.84	31.97	32.57	33.48	0.487874
105372	Utp15	mRNA	1417.67	1879.5	33.51	34.57	32.85	27.68	23.11	27.41	24.33	25.91	0.380134
76787	Ppfia3	mRNA	63.3333	71.25	0.93	1.76	1.56	1.62	1.23	0.71	1.56	1.56	0.97819
93739	Gabarapl2	mRNA	982.333	877.25	79.08	64.46	66.53	66.73	79.26	86.85	78.95	69.31	0.411149
50794	Klf13	mRNA	1043.33	1470.5	15.04	16.55	16.67	15.03	11.43	14.93	7.94	11.23	0.11879
54411	Atp6ap1	mRNA	3181.33	2781	73.61	91.29	98.35	99.26	94.61	126.94	105.05	86.84	0.32517
100040213	Gm2666	pseudo	31.49	28.89	0.19	0.67	0.89	2	1.41	1.75	1.79	0.51	0.707146
18814	Prl7d1	mRNA	2	2.5	0.23	0.24	0.32	0	0.08	0	0	0	0.557822
20494	Slc10a2	mRNA	0.166667	0	0	0	0	0	0	0	0	0
54196	Pabpn1	mRNA	4255.5	3969	166.82	156.66	155.32	168.15	166.19	186.27	183.49	189.9	0.473576
217265	Abca5	mRNA	692.667	883.5	7.11	9.42	9.35	7.17	5.57	6.76	7.22	4.3	0.668653
170716	Cyp4f13	mRNA	110.167	104.25	4.41	3.82	4.48	6.21	8.6	4.37	4.43	6.2	0.741977
224860	Plcl2	mRNA	97.1667	115.25	0.63	2.04	3.55	1.7	2.66	3.02	0.91	1.26	0.961183
243780	E330009J07Rik	mRNA	88.8333	92.25	0.37	1.03	1.04	1.21	1	1.06	0.64	0.89	0.961183
216821	Tmem11	mRNA	974.5	798.75	54.06	39.11	38.2	57.42	62.81	52.34	69.7	63.39	0.27087
103963	Rpn1	mRNA	2891	3101.5	62.98	56.07	60.3	58.5	52.55	58.6	54.43	59.16	0.975474
102640376	Gm36448	mRNA	0.165	0	0	0	0	0	0	0	0	0
23853	Def6	mRNA	348.5	364.75	11.41	10.38	9.79	14.05	13.67	12.81	7.64	11.94	0.944619
71932	Ephx3	mRNA	7.33333	6	0.23	0.42	0.25	0.06	0.23	0.25	0.12	0.23	0.978312
15112	Hao1	mRNA	5.66667	10.75	0.42	0.5	0.47	0.14	0.21	0.23	0.07	0.17	0.506055
14230	Fkbp10	mRNA	90.8333	174.678	1.43	6.08	9.98	1.68	3.89	4.31	1.01	1	0.573221
100036518	Vmn1r223	mRNA	0	0.25	0	0	0.07	0	0	0	0	0	0.961183
23882	Gadd45g	mRNA	500.833	437.75	46.29	17.07	25.32	34.47	28.56	22.96	71.96	43.81	0.569658
67773	Kat8	mRNA	416.833	410.5	18.66	20.56	20.82	20.5	23.54	20.56	22.07	24.41	0.368373
71609	Tradd	mRNA	360.167	273.25	10.93	12.84	12.07	22.46	19.71	22.04	20.28	18.26	0.218142
215280	Wipf1	mRNA	188.333	251.5	0.85	5.63	6.73	2.47	4.11	5.65	1.51	1.76	0.961183
23992	Prkra	mRNA	471.167	354.5	12.58	14.82	16.23	23.3	23.41	26.41	29.5	23.32	0.0930039
14419	Gal	mRNA	2	1.25	0	0	0.48	0.11	0	0.76	0.12	0.23	0.91896
19943	Rpl28	mRNA	19872.2	14984	3133.8	2314.51	2251.45	3140.61	3446.33	3261.2	4261.25	4605.84	0.102994
621603	Aldh3b2	mRNA	2.16667	3.25	0.03	0.03	0.3	0.06	0.29	0	0.03	0	0.961183
215274	Il1f10	mRNA	0.166667	0.25	0	0.17	0	0	0	0	0	0	0.961183
81703	Jdp2	mRNA	404.833	373	13.23	16.27	16.23	20.34	23.07	20.7	15.97	19.66	0.257393
231507	Plac8	mRNA	653	497.75	9.21	73.36	87.77	62.54	137.94	137.85	46.45	51.47	0.482086
638262	Gm7233	mRNA	0.166667	0	0	0	0	0	0	0	0	0.06	0.961183
70261	Chp2	mRNA	16.8333	14	0	0.72	2.35	0.57	0.06	3.79	0.07	0.31	0.961183
258173	Olfr1532-ps1	mRNA	0.166667	0.25	0	0.09	0	0	0.08	0	0	0	0.992335
229699	Slc16a4	mRNA	1.17667	1.9825	0.12	0.08	0.09	0	0.07	0	0	0.08	0.949869
327942	Pigl	mRNA	68.8583	74.335	2.15	3.44	3.72	3.78	4.03	4.03	2.65	3.5	0.792209
625662	Ankrd31	mRNA	0	0.25	0	0.01	0	0	0	0	0	0	0.961183
666907	Ms4a4a	mRNA	114.5	161.25	12.59	12.51	18.09	6.96	12.87	14.35	4.2	8.18	0.832716
436022	Dnaaf3	mRNA	31.8333	35.75	0.99	1.21	1.59	1	1.85	1.44	0.67	0.89	0.961183
223262	Timm8a2	mRNA	0.833333	0.5	0.17	0	0	0	0	0	0.17	0.08	0.950642
329375	Cfap77	mRNA	3.33333	4.75	0.29	0.21	0.31	0.53	0.21	0.5	0.28	0.26	0.992335
56374	Tmem59	mRNA	1611.33	1370.75	63.19	64.77	71.88	60.96	85.68	84.43	84.71	65.03	0.127847
69237	Gtpbp4	mRNA	3130.83	4000.25	133.14	107.47	100.63	85.34	76.48	80.91	89.08	91.32	0.718533
73381	Cmtm2a	mRNA	0.5	0.75	0	0	0.21	0	0.07	0	0.07	0.07	0.992335
75577	Dynap	mRNA	36.6667	16.75	0.61	0.68	0.74	2.03	1.6	2.31	4.65	1.48	0.176432
114142	Foxp2	mRNA	0.166667	0.75	0.01	0.01	0.01	0	0	0	0	0	0.902606
56448	Cyp2d22	mRNA	11.8333	24.5	0.53	0.52	1.26	0.2	0.35	0.5	0.32	0.1	0.572498
218304	Prss47	mRNA	0	0.25	0	0	0.06	0	0	0	0	0	0.961183
18261	Ocm	mRNA	0.166667	0	0	0	0	0	0	0	0	0.11	0.961183
329384	Ptrh1	mRNA	953.165	540.5	22.84	32.63	28.27	104.5	103.67	64.71	116.46	91.62	0.13013
212139	Cc2d1a	mRNA	750.167	899	19.52	18.51	16.98	19.28	18.22	17.29	13.38	19.93	0.961183
16988	Lst1	mRNA	273.333	152.5	4.19	41.27	38.02	57.29	120.61	94.39	36.53	51.34	0.234062
54709	Eif3i	mRNA	3897.33	3804	286.8	255.24	246.66	254.26	251.14	253.84	308.09	292.37	0.688542
230577	Pars2	mRNA	44.6667	43.5	0.9	1.04	1.06	1.92	1.67	1.94	0.86	1.72	0.783636
319875	Tmprss11b	mRNA	14	70.25	1.83	3.57	3.55	0.19	0.19	0.83	0.46	0.16	0.0632165
21461	Tcp10a	mRNA	0	0.255	0.03	0	0	0	0	0	0	0	0.961183
627367	Vmn2r97	mRNA	0	0.25	0	0	0.03	0	0	0	0	0	0.961183
77578	Bcl9	mRNA	292.5	459.25	3.77	5.95	5.62	5.73	3.94	4.58	1.69	3.65	0.252843
446099	Nlrp4e	mRNA	1.66667	0.5	0	0	0	0.04	0.04	0.04	0.04	0.08	0.56583
16193	Il6	mRNA	16	39.75	9.16	0.27	0.74	0.39	0.9	2.93	0.49	0.71	0.668698
230163	Aldob	mRNA	0.833333	0	0	0	0	0	0	0.19	0	0	0.791601
100503710	Gm5741	mRNA	0.333333	0.25	0.34	0	0	0	0	0	0	0.32	0.992335
107815	Scml2	mRNA	1.66667	1.25	0	0.03	0.04	0	0.03	0.03	0.02	0	0.991576
70884	Ccdc81	mRNA	0.166667	0.5	0.06	0	0	0	0	0.03	0	0	0.961183
18146	Npdc1	mRNA	298.667	251.75	9.21	11.74	11.72	12.45	11.2	18.17	14.57	13.87	0.21928
272396	Tarsl2	mRNA	378	644.75	16.98	14.82	14.73	10.22	8.56	9.31	7.76	9.5	0.0708157
68818	Zfand2b	mRNA	228.167	198.5	10.72	10.48	11.84	16.28	17.03	15.09	15.17	15.45	0.241571
18671	Abcb1a	mRNA	59.4	80.6625	1.18	1.29	1.07	0.88	0.8	1.6	0.3	0.58	0.733471
269060	Dagla	mRNA	318.167	254.25	1.13	2.64	2.9	5.7	4.6	4.57	1.42	6.9	0.610866
228875	Slc35c2	mRNA	540.833	532	17.13	22.14	17.41	20.15	16.69	23.26	17.98	21.96	0.760289
107435	Hat1	mRNA	1224.33	1377.75	61.01	71.18	68.04	56.3	61.33	53.56	55.63	59.68	0.961183
18674	Slc25a3	mRNA	9965	9679.5	458.97	474.16	447.01	516.06	507.15	493.8	523.88	541.92	0.448835
24115	Best1	mRNA	1.66667	3	0.1	0.04	0.17	0.1	0	0.07	0.14	0.1	0.961183
17449	Mdh1	mRNA	2235.67	2389.5	93.05	78.51	83.95	95.8	93.8	77.94	85.39	93.56	0.890937
192170	Eif4a3	mRNA	3449.83	4334.25	263.68	217.54	204.61	188.49	173.69	164.78	176.94	207.57	0.763574
78016	Ccdc150	mRNA	7	10.5	0.34	0.2	0.21	0.14	0.18	0.17	0.03	0.16	0.691522
66945	Sdha	mRNA	4050.67	5308.25	114.71	144.41	140.52	124.66	100.92	110.81	95.48	102.97	0.141357
271842	Rpusd2	mRNA	129.167	219.25	3.55	3.25	2.79	2.23	1.93	1.74	1.32	2.35	0.173198
99138	Stard7	mRNA	1009.5	1302	25.93	34.28	31.3	25.75	21.17	27.9	19.46	22.81	0.307477
11727	Ang	mRNA	20.5	21	1.1	1.55	3.63	2.04	2.12	2.64	1.33	2.42	0.961183
12417	Cbx3	mRNA	3655.83	3800.25	158.39	165.01	158.33	157	126.38	153.97	142.38	176.02	0.953963
20706	Serpinb9b	mRNA	814.5	567.25	5.13	7.93	8.35	62.21	66.72	19.9	24.9	38.92	0.681385
20481	Ski	mRNA	926.5	1034.5	8.23	12.49	15.69	16.24	16	15.37	8.89	12.11	0.956263
54562	Lrrc6	mRNA	0	0.25	0	0	0.03	0	0	0	0	0	0.961183
328795	Ubash3a	mRNA	9	11.75	0.09	0.34	0.46	0.24	0.32	0.44	0.07	0.18	0.98794
12830	Col4a5	mRNA	19.5	14	0.03	0.16	0.26	0.15	0.25	0.31	0.21	0.09	0.724456
59041	Stk25	mRNA	1403.96	1338.04	45.28	41.18	39.19	50.58	51.05	54.03	50.1	47.96	0.337734
21948	Cd70	mRNA	0.666667	1	0.09	0.1	0.1	0.09	0	0.1	0.1	0.09	0.967177
16519	Kcnj3	mRNA	0.5	2.75	0	0.09	0.06	0.02	0	0.02	0	0	0.552014
27277	Golga5	mRNA	292.5	485	16.86	11.12	11.38	9.08	9.37	8.2	8.06	7.29	0.260842
246198	Mllt6	mRNA	782.333	924.5	7.94	8.52	10.13	8.63	7.37	9.93	4.09	8.78	0.840015
243339	Tmem130	mRNA	0.5	1.25	0	0.03	0.05	0.05	0.05	0	0	0.03	0.961183
74616	Scrn3	mRNA	53.8333	59.5	0.69	1.26	1.48	1.75	1.5	1.43	1.03	1.1	0.994239
11551	Adra2a	mRNA	27.8333	23.25	0.44	0.48	0.15	0.63	1.12	0.51	0.3	0.34	0.809256
74190	Exoc3l4	mRNA	139	93.5	1.87	1.72	1.63	2.94	3.11	2.96	3.43	3.67	0.0820138
22428	Dctn6	mRNA	319.833	283.25	22.31	17.2	16.67	18.4	26.78	25.27	20.03	20.46	0.288418
100043133	9130023H24Rik	mRNA	51.935	56.42	0.26	1.37	1.66	1.13	0.85	1.03	0.77	1.17	0.961409
66138	Bud23	mRNA	376.5	375	18.6	17.13	17.66	23.02	25.36	18.43	19.56	25.07	0.575081
22004	Tpm2	mRNA	773.167	1473.25	57.22	15.12	54.79	86.34	27.67	21.57	22.77	25.8	0.0898679
20198	S100a4	mRNA	664.667	550.25	109.75	109.79	112.92	54.25	76.02	126.96	141.77	81.63	0.796527
229317	Eif2a	mRNA	444	497.75	15.72	16.06	16.59	13.52	14.64	16.44	16.25	13.74	0.950642
66307	Isoc1	mRNA	63.6667	79	0.28	2.75	4.03	1.73	3.16	3.64	0.6	1.15	0.992335
232748	Tcaf2	mRNA	4.33333	9.75	0.05	0.23	0.26	0.1	0.14	0.07	0.02	0.03	0.578583
66615	Atg4b	mRNA	827.333	866.75	25.45	19.46	18.03	19.33	21.44	21.16	22.38	20.66	0.818437
14104	Fasn	mRNA	2842	4542.75	31.32	35.92	34.68	23.22	15.42	26.85	15.43	22.24	0.111812
52626	Cdkn2aipnl	mRNA	1059.33	1381.75	80.99	44.49	42.81	45.85	43.49	41.39	37.76	45.1	0.690312
104601	Mycbpap	mRNA	15.5	12.5	0.45	0.29	0.23	0.2	0.28	0.08	0.23	0.48	0.999042
11640	Akap1	mRNA	1358	1662.75	25.16	33.36	34.49	31.46	24.59	27.92	21.57	28.56	0.512087
54630	Prickle3	mRNA	19.8833	28.84	0.53	0.9	1.3	0.87	0.79	1.11	0.17	0.57	0.846154
78373	Nudt17	mRNA	108.5	95	5.89	4.76	4.59	5.7	5.75	5.89	5.73	6.37	0.51899
108168936	LOC108168936	mRNA	1.83333	4.5	0.04	0	0.01	0.04	0.01	0.01	0	0.01	0.683929
[truncated: 15,622 more rows]
