# Supplementary material for: Aqueous extract of Sanghuangporus baumii induces autophagy to inhibit cervical carcinoma growth
Source: Royal Society of Chemistry journal article supplement (doi:10.1039/d2fo02887e), 2023-01-01

Electronic Supplementary Material (ESI) for Food & Function.  
This journal is © The Royal Society of Chemistry 2023

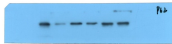

Supplement: d2fo02887e6.pdf [file d2fo02887e6.pdf]
