# Supplementary figures and images for: Aqueous extract of Sanghuangporus baumii induces autophagy to inhibit cervical carcinoma growth
Source: Royal Society of Chemistry journal article supplement (doi:10.1039/d2fo02887e), 2023-01-01

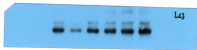

Supplement: d2fo02887e5.pdf [file d2fo02887e5.pdf]

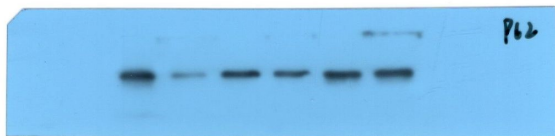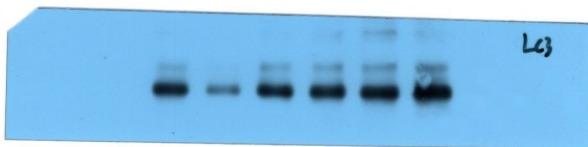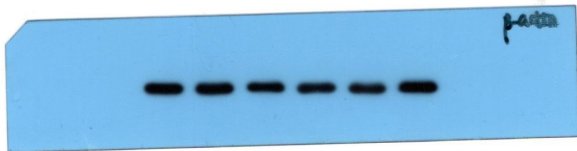

Supplement: d2fo02887e7.pdf [file d2fo02887e7.pdf]
